# Supplementary material for: High-Interface Alkalinity Induced by Intercalated Squaric Acid Anions for 700 Hours of Oxygen Evolution at 3 A cm−2
Source: Research Square preprint supplement (doi:10.21203/rs.3.rs-5261089/v1), 2025-02-27
Supplement: Supplementary file 1 [file 505739640d3a640f4d7e10bd.xlsx]

## Sheet: Fig. 2a
NiFe-SQ/NF-R	NiFe-SQ/NF-R	NiFe-LDH/NF-R	NiFe-LDH/NF-R	NF-R	NF-R
x	y	x	y	x	y
1.03534	-7.22986	1.06664	-8.15278	1.80618	334.861
1.03594	-7.04159	1.06744	-7.97589	1.80668	333.552
1.03154	-7.13705	1.06074	-7.87531	1.80628	327.171
1.03254	-6.98411	1.06184	-7.53362	1.80768	324.784
1.03334	-6.86937	1.06244	-7.22264	1.80758	321.557
1.03374	-6.73502	1.06354	-6.93536	1.80658	319.598
1.03514	-6.61847	1.06504	-6.66028	1.80588	316.49
1.03634	-6.48493	1.06614	-6.42339	1.80568	309.44
1.03704	-6.39147	1.06704	-6.19625	1.80418	306.349
1.03864	-6.28428	1.06774	-5.98662	1.80258	299.036
1.03984	-6.19987	1.06894	-5.78133	1.79988	295.083
1.04084	-6.10892	1.07014	-5.58522	1.79968	289.347
1.04124	-6.03321	1.07054	-5.40391	1.80028	286.858
1.04264	-5.95578	1.07204	-5.22831	1.79868	282.215
1.04404	-5.86471	1.07344	-5.05626	1.79728	272.844
1.04444	-5.80558	1.07384	-4.90431	1.79608	272.904
1.04504	-5.74045	1.07474	-4.75074	1.79518	268.114
1.04604	-5.66015	1.07624	-4.59493	1.79388	266.492
1.04704	-5.58292	1.07684	-4.45852	1.79318	260.221
1.04864	-5.5073	1.07824	-4.33289	1.79318	257.359
1.04954	-5.43708	1.07924	-4.20655	1.79298	255.441
1.05074	-5.3887	1.07964	-4.10019	1.79178	250.854
1.05204	-5.31966	1.08084	-3.97942	1.79118	246.968
1.05224	-5.27736	1.08224	-3.86669	1.79008	242.189
1.05314	-5.2184	1.08324	-3.76195	1.78898	234.914
1.05374	-5.1532	1.08434	-3.67111	1.78828	232.904
1.05584	-5.09236	1.08564	-3.57876	1.78638	224.341
1.05704	-5.02997	1.08584	-3.49544	1.78478	222.018
1.05734	-5.00256	1.08704	-3.40893	1.78238	218.549
1.05874	-4.94055	1.08834	-3.31861	1.78078	212.709
1.05934	-4.88806	1.08904	-3.24399	1.77958	210.024
1.06004	-4.85115	1.09014	-3.16669	1.77628	205.958
1.06184	-4.79143	1.09104	-3.09809	1.77568	203.675
1.06284	-4.74765	1.09234	-3.02682	1.77528	202.239
1.06314	-4.70872	1.09324	-2.95921	1.77348	198.244
1.06384	-4.66189	1.09434	-2.89102	1.77268	197.259
1.06594	-4.60383	1.09524	-2.82761	1.77118	191.807
1.06624	-4.55578	1.09604	-2.76792	1.77018	190.363
1.06754	-4.53487	1.09704	-2.71203	1.76978	189.257
1.06944	-4.47169	1.09834	-2.65331	1.76888	184.941
1.06914	-4.45196	1.09934	-2.59763	1.76868	183.949
1.07004	-4.40998	1.10054	-2.54187	1.76838	182.785
1.07204	-4.3564	1.10084	-2.48912	1.76628	176.794
1.07254	-4.32234	1.10204	-2.44363	1.76638	177.34
1.07324	-4.30179	1.10334	-2.38995	1.76498	173.035
1.07434	-4.24859	1.10414	-2.34995	1.76368	172.053
1.07604	-4.21152	1.10544	-2.29854	1.76258	168.068
1.07714	-4.16802	1.10624	-2.25304	1.76118	165.425
1.07724	-4.15487	1.10804	-2.20808	1.75998	164.254
1.07834	-4.11556	1.10874	-2.16963	1.75738	159.285
1.07964	-4.07786	1.10924	-2.13892	1.75618	158.25
1.08044	-4.04124	1.11084	-2.09837	1.75378	155.505
1.08164	-4.01035	1.11114	-2.06021	1.75328	153.328
1.08284	-3.96843	1.11184	-2.02369	1.75288	152.28
1.08344	-3.94455	1.11394	-1.97985	1.75078	149.893
1.08484	-3.91538	1.11484	-1.9487	1.75018	148.019
1.08534	-3.87923	1.11554	-1.92187	1.74898	145.878
1.08584	-3.85923	1.11624	-1.89073	1.74928	145.963
1.08764	-3.80813	1.11744	-1.85816	1.74828	143.983
1.08854	-3.77859	1.11894	-1.82223	1.74708	142.757
1.08984	-3.74949	1.11984	-1.79251	1.74738	142.373
1.09124	-3.7192	1.12054	-1.76749	1.74648	138.988
1.09144	-3.7053	1.12144	-1.74225	1.74518	137.064
1.09254	-3.67233	1.12224	-1.71593	1.74458	136.741
1.09344	-3.63927	1.12364	-1.68548	1.74298	135.347
1.09504	-3.60785	1.12464	-1.65707	1.74268	134.174
1.09614	-3.57795	1.12524	-1.63021	1.74068	130.31
1.09644	-3.56852	1.12654	-1.60704	1.73998	127.805
1.09724	-3.53846	1.12774	-1.58358	1.73778	125.621
1.09834	-3.50483	1.12864	-1.56428	1.73638	123.961
1.09954	-3.47108	1.12974	-1.53964	1.73438	123.373
1.10144	-3.44028	1.13054	-1.51376	1.73158	120.293
1.10164	-3.41879	1.13114	-1.49294	1.73088	120.214
1.10224	-3.41533	1.13244	-1.4698	1.73098	119.229
1.10434	-3.36812	1.13384	-1.45002	1.72918	118.211
1.10444	-3.35042	1.13434	-1.4316	1.72748	118.082
1.10534	-3.33238	1.13554	-1.41242	1.72798	116.92
1.10694	-3.29565	1.13664	-1.38425	1.72738	115.838
1.10804	-3.27511	1.13734	-1.36961	1.72718	115.025
1.10904	-3.26003	1.13894	-1.34664	1.72638	114.547
1.10944	-3.23219	1.13954	-1.33454	1.72548	113.157
1.11034	-3.21565	1.14044	-1.31724	1.72538	111.391
1.11194	-3.1785	1.14144	-1.29796	1.72408	110.13
1.11294	-3.15862	1.14254	-1.27448	1.72408	108.893
1.11344	-3.14521	1.14374	-1.25702	1.72278	107.592
1.11474	-3.12484	1.14454	-1.24206	1.72128	105.812
1.11584	-3.09373	1.14554	-1.23152	1.72048	104.269
1.11624	-3.07669	1.14664	-1.21329	1.71848	102.323
1.11794	-3.04788	1.14724	-1.19865	1.71688	100.609
1.11884	-3.02257	1.14854	-1.17647	1.71558	100.075
1.11974	-3.01913	1.14964	-1.16052	1.71458	98.3991
1.12104	-2.98208	1.15064	-1.14724	1.71168	96.8263
1.12094	-2.97336	1.15164	-1.13616	1.71088	95.4901
1.12284	-2.94681	1.15244	-1.12273	1.71008	95.2185
1.12444	-2.91184	1.15394	-1.10686	1.70928	93.8764
1.12484	-2.90921	1.15474	-1.08689	1.70728	93.6218
1.12554	-2.897	1.15554	-1.07781	1.70658	91.3215
1.12654	-2.86781	1.15644	-1.06224	1.70748	92.4201
1.12724	-2.84833	1.15674	-1.05529	1.70618	90.8962
1.12874	-2.82205	1.15904	-1.03794	1.70628	90.9437
1.13024	-2.79718	1.16014	-1.02173	1.70588	90.7526
1.13104	-2.78898	1.16054	-1.01425	1.70458	89.2545
1.13154	-2.77716	1.16154	-0.99644	1.70428	88.2933
1.13274	-2.7551	1.16224	-0.9888	1.70318	87.4008
1.13344	-2.72797	1.16354	-0.97681	1.70098	84.5796
1.13464	-2.71601	1.16444	-0.96632	1.70088	84.404
1.13574	-2.68525	1.16514	-0.95319	1.69998	83.6185
1.13654	-2.67821	1.16674	-0.93539	1.69748	81.6586
1.13814	-2.65673	1.16754	-0.92105	1.69638	80.3845
1.13864	-2.63598	1.16844	-0.91832	1.69518	79.9259
1.13944	-2.62215	1.17004	-0.90456	1.69298	77.6301
1.14124	-2.59218	1.17044	-0.89877	1.69008	77.0332
1.14164	-2.58442	1.17154	-0.88843	1.69018	75.9012
1.14284	-2.57647	1.17284	-0.86776	1.69058	76.363
1.14394	-2.5447	1.17314	-0.86311	1.68828	75.8629
1.14444	-2.53768	1.17444	-0.85113	1.68738	75.0738
1.14594	-2.51376	1.17604	-0.84249	1.68758	74.8844
1.14694	-2.4977	1.17654	-0.83479	1.68728	74.8926
1.14764	-2.48927	1.17754	-0.82905	1.68628	73.6011
1.14884	-2.47302	1.17854	-0.80838	1.68528	73.4277
1.15014	-2.44825	1.17944	-0.80466	1.68438	73.004
1.15084	-2.43653	1.18074	-0.79033	1.68408	71.9182
1.15194	-2.4131	1.18154	-0.78905	1.68398	71.7594
1.15274	-2.39767	1.18264	-0.77752	1.68318	70.4189
1.15414	-2.37865	1.18334	-0.77002	1.68118	68.8316
1.15554	-2.36067	1.18474	-0.75357	1.67998	68.4426
1.15644	-2.34901	1.18564	-0.74455	1.67848	65.9776
1.15654	-2.33779	1.18704	-0.73831	1.67798	65.1916
1.15784	-2.31956	1.18784	-0.73406	1.67658	64.8649
1.15884	-2.29288	1.18844	-0.73275	1.67398	63.6308
1.16014	-2.28867	1.18944	-0.71715	1.67298	63.044
1.16164	-2.26136	1.19044	-0.70481	1.67158	62.3617
1.16184	-2.25822	1.19194	-0.69236	1.66928	61.0134
1.16304	-2.24097	1.19254	-0.68748	1.66938	61.0043
1.16404	-2.21847	1.19344	-0.68725	1.66828	60.2722
1.16474	-2.21414	1.19484	-0.67615	1.66818	60.405
1.16594	-2.19342	1.19584	-0.66605	1.66698	60.2658
1.16734	-2.17854	1.19644	-0.6578	1.66588	59.3808
1.16854	-2.15724	1.19754	-0.64806	1.66478	59.013
1.16904	-2.15429	1.19874	-0.63941	1.66438	57.6263
1.17004	-2.1365	1.19924	-0.64037	1.66468	57.8647
1.17064	-2.12487	1.20064	-0.6292	1.66338	57.1327
1.17194	-2.11177	1.20204	-0.61622	1.66338	57.0625
1.17344	-2.08475	1.20284	-0.60937	1.66268	55.6177
1.17414	-2.07579	1.20374	-0.60049	1.66158	55.3118
1.17494	-2.05981	1.20464	-0.59967	1.65958	54.0397
1.17634	-2.04613	1.20534	-0.59147	1.65868	53.101
1.17734	-2.02759	1.20634	-0.58977	1.65738	52.1949
1.17814	-2.03036	1.20784	-0.57104	1.65508	50.5536
1.17924	-2.00564	1.20864	-0.56513	1.65378	50.4896
1.17984	-1.99624	1.20974	-0.55665	1.65228	49.4003
1.18074	-1.9811	1.21074	-0.55257	1.65068	48.7142
1.18144	-1.96024	1.21174	-0.5501	1.64948	48.3727
1.18324	-1.95139	1.21264	-0.5438	1.64918	47.8632
1.18494	-1.91991	1.21354	-0.53357	1.64818	47.5552
1.18524	-1.92538	1.21474	-0.52199	1.64708	46.8306
1.18524	-1.90759	1.21564	-0.51033	1.64678	46.7681
1.18714	-1.89468	1.21674	-0.51171	1.64608	46.5375
1.18874	-1.85537	1.21794	-0.50483	1.64518	46.2043
1.18914	-1.87581	1.21854	-0.50393	1.64468	45.7675
1.19024	-1.84487	1.21974	-0.49242	1.64438	45.6317
1.19044	-1.84393	1.22104	-0.47657	1.64258	44.5799
1.19244	-1.81445	1.22134	-0.47417	1.64318	44.4969
1.19354	-1.79443	1.22264	-0.47039	1.64318	44.0136
1.19424	-1.79981	1.22384	-0.4639	1.64138	42.4951
1.19544	-1.78742	1.22454	-0.46319	1.64028	42.266
1.19604	-1.77094	1.22534	-0.45203	1.63838	40.7471
1.19704	-1.762	1.22684	-0.43603	1.63618	39.451
1.19814	-1.73927	1.22794	-0.42934	1.63438	38.8068
1.19904	-1.73345	1.22874	-0.43143	1.63438	38.2577
1.20034	-1.71441	1.22954	-0.42879	1.63328	37.63
1.20054	-1.71023	1.23054	-0.42221	1.63008	36.8022
1.20194	-1.69302	1.23184	-0.40653	1.62958	36.4024
1.20314	-1.66149	1.23264	-0.3962	1.62918	36.9184
1.20384	-1.66002	1.23394	-0.38943	1.62748	35.2909
1.20534	-1.63896	1.23454	-0.38758	1.62738	35.7773
1.20634	-1.62912	1.23564	-0.39061	1.62688	34.9812
1.20714	-1.6246	1.23724	-0.37287	1.62678	35.3648
1.20784	-1.60677	1.23764	-0.37422	1.62488	34.3916
1.20914	-1.59262	1.23824	-0.36078	1.62448	34.0889
1.21034	-1.5686	1.23964	-0.35311	1.62408	34.2177
1.21074	-1.56783	1.24094	-0.34003	1.62368	33.7563
1.21204	-1.55505	1.24144	-0.3515	1.62298	33.5715
1.21364	-1.52625	1.24264	-0.33825	1.62158	32.7296
1.21394	-1.52884	1.24344	-0.32717	1.62098	31.9592
1.21524	-1.51047	1.24474	-0.3157	1.61938	31.2415
1.21594	-1.48855	1.24584	-0.30294	1.61818	30.1942
1.21724	-1.48797	1.24674	-0.30894	1.61728	29.5755
1.21834	-1.45779	1.24794	-0.30034	1.61488	28.7646
1.21874	-1.46169	1.24864	-0.30117	1.61278	27.7125
1.22024	-1.43496	1.24974	-0.28831	1.61208	27.5928
1.22144	-1.41316	1.25054	-0.2761	1.61098	27.0039
1.22224	-1.40777	1.25184	-0.26855	1.60938	26.4718
1.22324	-1.3975	1.25284	-0.26025	1.60838	26.3892
1.22434	-1.38475	1.25344	-0.26645	1.60718	25.9497
1.22514	-1.36621	1.25484	-0.25254	1.60628	25.873
1.22554	-1.36117	1.25594	-0.24156	1.60688	25.8206
1.22724	-1.33299	1.25723	-0.22295	1.60658	25.5353
1.22874	-1.30475	1.25773	-0.22472	1.60538	25.0431
1.22904	-1.31499	1.25883	-0.22261	1.60468	24.7826
1.23014	-1.2985	1.25993	-0.21363	1.60358	24.2722
1.23124	-1.27284	1.26113	-0.20773	1.60368	23.7989
1.23204	-1.26541	1.26193	-0.19537	1.60288	23.5268
1.23334	-1.24107	1.26283	-0.19101	1.60158	22.5102
1.23424	-1.2291	1.26393	-0.176	1.60018	22.3248
1.23484	-1.22598	1.26523	-0.17608	1.59848	21.3424
1.23624	-1.19981	1.26603	-0.1741	1.59778	20.7644
1.23734	-1.18245	1.26663	-0.1737	1.59538	19.9688
1.23824	-1.16628	1.26793	-0.1512	1.59448	19.3135
1.23884	-1.16041	1.26893	-0.14041	1.59358	19.1572
1.24024	-1.13623	1.26983	-0.13387	1.59218	18.2828
1.24104	-1.12453	1.27083	-0.13305	1.59028	18.0277
1.24204	-1.10585	1.27193	-0.13093	1.58928	17.4757
1.24324	-1.08769	1.27293	-0.12269	1.58838	17.5651
1.24384	-1.07082	1.27403	-0.10867	1.58688	16.7908
1.24514	-1.05464	1.27503	-0.0962	1.58568	16.9093
1.24604	-1.03167	1.27553	-0.0974	1.58568	16.6601
1.24714	-1.02936	1.27673	-0.09463	1.58598	16.8088
1.24844	-0.99829	1.27803	-0.08259	1.58498	16.2093
1.24874	-0.9911	1.27843	-0.08339	1.58388	16.2414
1.25004	-0.97063	1.27963	-0.06724	1.58338	15.6404
1.25154	-0.93367	1.28113	-0.038	1.58388	15.6915
1.25214	-0.93355	1.28193	-0.0426	1.58158	15.0142
1.25344	-0.91532	1.28263	-0.04083	1.58158	14.5465
1.25444	-0.89418	1.28393	-0.03781	1.58038	14.1383
1.25514	-0.88593	1.28503	-0.02084	1.57868	13.4718
1.25614	-0.86479	1.28603	-0.00542	1.57678	12.8245
1.25694	-0.84725	1.28673	0.00373	1.57658	12.3912
1.25794	-0.83043	1.28743	0.00199	1.57428	11.9533
1.25924	-0.79858	1.28823	0.00328	1.57238	11.2973
1.26024	-0.77818	1.28963	0.02076	1.57138	11.2025
1.26104	-0.75777	1.29063	0.02785	1.56978	10.7399
1.26204	-0.73827	1.29163	0.04569	1.56918	10.6093
1.26304	-0.72164	1.29243	0.04657	1.56808	10.3726
1.26434	-0.70283	1.29373	0.06403	1.56698	10.1834
1.26524	-0.6806	1.29463	0.06303	1.56548	10.0812
1.26584	-0.66984	1.29563	0.06612	1.56578	9.86822
1.26704	-0.63101	1.29663	0.07643	1.56658	10.1172
1.26784	-0.61263	1.29763	0.09288	1.56528	9.71744
1.26904	-0.59446	1.29873	0.1072	1.56398	9.4864
1.27034	-0.55942	1.29943	0.11402	1.56298	9.12184
1.27104	-0.55065	1.30063	0.11505	1.56288	9.007
1.27174	-0.52394	1.30193	0.12838	1.56218	8.71172
1.27294	-0.49799	1.30253	0.12869	1.56168	8.41574
1.27454	-0.44796	1.30373	0.14741	1.55938	7.89839
1.27524	-0.44709	1.30443	0.16234	1.55848	7.53527
1.27604	-0.4219	1.30553	0.16999	1.55718	7.29137
1.27694	-0.39398	1.30673	0.18135	1.55438	6.83603
1.27844	-0.35049	1.30763	0.17464	1.55448	6.65799
1.27934	-0.32694	1.30843	0.18818	1.55338	6.54922
1.27984	-0.32105	1.30943	0.20796	1.55088	6.06653
1.28084	-0.29297	1.31073	0.23364	1.55008	5.91908
1.28224	-0.24762	1.31163	0.23953	1.54838	5.81175
1.28344	-0.21889	1.31233	0.22927	1.54758	5.65571
1.28453	-0.17343	1.31373	0.24706	1.54768	5.61707
1.28483	-0.16563	1.31453	0.2592	1.54628	5.49829
1.28613	-0.13735	1.31533	0.26916	1.54568	5.3528
1.28753	-0.07676	1.31684	0.3111	1.54508	5.33741
1.28823	-0.06775	1.31814	0.31546	1.54408	5.13009
1.28923	-0.03348	1.31874	0.31458	1.54388	5.226
1.29013	-0.000794525	1.31944	0.30774	1.54398	4.97216
1.29073	0.02464	1.32094	0.33677	1.54328	4.87441
1.29183	0.03277	1.32204	0.37129	1.54158	4.59725
1.29283	0.10082	1.32284	0.37381	1.54138	4.47115
1.29373	0.11277	1.32394	0.38451	1.53978	4.19622
1.29503	0.18837	1.32484	0.38657	1.53808	3.97095
1.29583	0.2011	1.32574	0.39461	1.53698	3.75867
1.29703	0.25441	1.32674	0.41236	1.53568	3.47156
1.29763	0.269	1.32794	0.43794	1.53328	3.33719
1.29924	0.33222	1.32884	0.45822	1.53218	3.18216
1.30044	0.3952	1.32964	0.46918	1.53108	3.07869
1.30124	0.41461	1.33094	0.47342	1.52938	2.93191
1.30184	0.46151	1.33194	0.49694	1.52848	2.96077
1.30284	0.50506	1.33264	0.50113	1.52758	2.81052
1.30404	0.57317	1.33394	0.54702	1.52678	2.76871
1.30504	0.62147	1.33484	0.56953	1.52598	2.73854
1.30584	0.67496	1.33574	0.5831	1.52578	2.71682
1.30684	0.73119	1.33684	0.58924	1.52548	2.64307
1.30794	0.81226	1.33794	0.61945	1.52488	2.57996
1.30904	0.86486	1.33894	0.62768	1.52408	2.53457
1.31014	0.94993	1.34004	0.68315	1.52328	2.39355
1.31094	0.989	1.34074	0.6948	1.52237	2.25866
1.31234	1.09016	1.34184	0.71776	1.52217	2.24015
1.31274	1.16282	1.34264	0.73248	1.52097	2.06434
1.31374	1.20896	1.34414	0.75728	1.51917	1.88782
1.31524	1.3561	1.34494	0.81408	1.51737	1.80517
1.31604	1.40449	1.34534	0.82145	1.51547	1.66633
1.31664	1.50434	1.34664	0.90772	1.51447	1.57484
1.31804	1.60993	1.34774	0.93731	1.51347	1.52242
1.31884	1.7952	1.34874	0.9842	1.51197	1.49788
1.31974	1.82845	1.34984	0.99807	1.51057	1.36594
1.32114	2.07636	1.35084	1.07811	1.51067	1.34401
1.32114	2.12938	1.35154	1.12015	1.50767	1.33785
1.32244	2.32982	1.35294	1.21062	1.50647	1.21241
1.32364	2.59287	1.35364	1.26222	1.50687	1.25779
1.32464	2.76817	1.35444	1.28462	1.50597	1.24384
1.32644	3.08722	1.35574	1.41383	1.50557	1.22668
1.32704	3.31143	1.35664	1.50055	1.50527	1.14407
1.32714	3.49423	1.35764	1.60991	1.50457	1.14359
1.32904	3.88722	1.35874	1.74992	1.50317	1.11686
1.32964	4.31389	1.35974	1.84281	1.50297	1.03567
1.33034	4.54005	1.36064	1.93403	1.50267	0.99209
1.33204	5.1047	1.36144	2.04721	1.50207	0.97702
1.33244	5.46103	1.36224	2.17968	1.50047	0.89345
1.33304	5.90076	1.36364	2.36691	1.49877	0.76364
1.33414	6.49977	1.36454	2.53149	1.49757	0.77252
1.33524	7.21158	1.36504	2.56348	1.49577	0.72194
1.33644	7.7462	1.36664	2.73599	1.49357	0.63499
1.33744	8.51515	1.36774	2.88087	1.49347	0.62421
1.33814	8.99841	1.36864	2.96825	1.49277	0.68465
1.33924	9.8041	1.36964	3.11448	1.49017	0.52989
1.34004	10.4057	1.37074	3.17405	1.48927	0.53811
1.34144	11.2823	1.37214	3.27003	1.48847	0.57583
1.34214	11.8535	1.37274	3.29393	1.48797	0.5448
1.34354	12.6002	1.37354	3.28907	1.48687	0.47893
1.34384	13.3308	1.37504	3.48112	1.48617	0.51727
1.34464	13.7826	1.37574	3.55866	1.48547	0.51362
1.34584	14.9702	1.37684	3.6242	1.48497	0.45069
1.34714	15.5226	1.37814	3.73053	1.48467	0.47385
1.34764	16.5077	1.37894	3.70862	1.48377	0.48827
1.34844	16.9795	1.37954	3.77677	1.48297	0.39135
1.35024	18.3745	1.38064	3.87109	1.48277	0.38294
1.35084	18.9477	1.38174	4.10597	1.48147	0.39645
1.35184	19.6441	1.38254	4.12407	1.48027	0.3248
1.35324	20.5468	1.38404	4.31712	1.47907	0.27203
1.35354	21.2438	1.38494	4.36434	1.47757	0.28916
1.35464	21.7932	1.38574	4.44193	1.47597	0.26958
1.35584	23.0047	1.38664	4.55469	1.47427	0.18858
1.35654	23.5308	1.38814	4.75755	1.47327	0.19318
1.35844	24.6856	1.38914	4.84831	1.47177	0.23246
1.35924	25.3238	1.38984	4.84819	1.46997	0.1595
1.35984	25.5897	1.39064	4.90986	1.46927	0.17331
1.36124	26.4531	1.39124	5.01001	1.46827	0.22102
1.36184	27.2433	1.39234	5.21119	1.46777	0.19245
1.36324	27.926	1.39374	5.48467	1.46647	0.14997
1.36424	29.0163	1.39504	5.64731	1.46577	0.18144
1.36464	29.362	1.39574	5.70387	1.46567	0.21981
1.36574	30.5986	1.39664	5.75582	1.46447	0.13725
1.36754	31.7778	1.39794	5.92572	1.46407	0.16716
1.36794	32.9241	1.39894	6.03981	1.46377	0.20678
1.36834	33.327	1.39974	6.17235	1.46287	0.13144
1.36964	35.1827	1.40054	6.2806	1.46257	0.10589
1.36984	36.2709	1.40164	6.44029	1.46127	0.15378
1.37164	38.1005	1.40284	6.59019	1.46007	0.07361
1.37204	39.9078	1.40364	6.69045	1.45907	0.05711
1.37314	41.2984	1.40484	6.92453	1.45727	0.0766
1.37394	43.5004	1.40584	7.18083	1.45577	0.05933
1.37394	44.6904	1.40684	7.29601	1.45487	0.00736
1.37524	47.6993	1.40784	7.47877	1.45346	0.01007
1.37584	50.1686	1.40864	7.54783	1.45216	-0.00378
1.37734	52.5362	1.40984	7.78476	1.45116	-0.018
1.37804	55.1959	1.41084	7.9676	1.44946	-0.01616
1.37854	57.1592	1.41174	8.25124	1.44856	0.0088
1.37944	60.3954	1.41254	8.37553	1.44856	0.00852
1.38024	63.0758	1.41364	8.57768	1.44736	-0.01408
1.38084	66.2683	1.41464	8.77272	1.44546	-0.01498
1.38124	68.9698	1.41594	8.90777	1.44506	-0.00952
1.38264	72.7909	1.41664	9.192	1.44466	-0.00952
1.38384	76.0986	1.41784	9.23236	1.44396	-0.022
1.38474	79.7344	1.41874	9.61475	1.44216	-0.01563
1.38544	83.0108	1.41954	9.56536	1.44066	-0.03277
1.38624	86.3143	1.42074	9.90588	1.44017	-0.03416
1.38694	89.5144	1.42164	10.0108	1.43917	0.03627
1.38814	93.3173	1.42284	10.3194	1.43777	-0.01302
1.38884	96.6754	1.42354	10.4825	1.43686	-0.0318
1.39004	101.06	1.42474	10.731	1.43487	-0.00705
1.39094	104.272	1.42554	10.908	1.43456	-0.00608
1.39184	108.083	1.42664	10.9657	1.43456	-0.00543
1.39294	111.897	1.42794	11.3586	1.43326	-0.01925
1.39394	115.316	1.42894	11.5096	1.43166	-0.02994
1.39504	118.314	1.42984	11.666	1.43087	-0.05349
1.39654	122.522	1.43034	11.7895	1.42987	-0.04354
1.39714	126.121	1.43184	11.9834	1.42867	-0.00328
1.39864	129.129	1.43274	12.3235	1.42846	-0.00803
1.39974	132.296	1.43364	12.2727	1.42786	-0.02653
1.40114	134.542	1.43484	12.7567	1.42706	-0.00335
1.40224	138.131	1.43584	12.7417	1.42636	-0.02421
1.40314	140.254	1.43654	13.1309	1.42566	-0.03277
1.40424	142.734	1.43744	13.0084	1.42417	-0.06517
1.40564	145.084	1.43874	13.5665	1.42307	-0.01104
1.40684	147.867	1.43964	13.5048	1.42236	-0.03277
1.40734	149.064	1.44084	14.0078	1.42167	-0.07673
1.40924	152.257	1.44144	13.9844	1.42077	0.00792
1.41034	153.411	1.44264	14.428	1.41996	-0.03277
1.41174	155.979	1.44354	14.4514	1.41897	-0.10241
1.41264	156.904	1.44464	14.6594	1.41797	-0.0418
1.41344	158.628	1.44574	14.9443	1.41697	-0.05169
1.41494	159.775	1.44684	15.1387	1.41647	-0.10757
1.41664	162.156	1.44764	15.4714	1.41537	-0.09119
1.41724	162.648	1.44844	15.5599	1.41407	-0.06913
1.41834	163.78	1.44964	15.7949	1.41287	-0.13455
1.41934	164.988	1.45094	16.0133	1.41127	-0.18187
1.42104	166.445	1.45154	16.1488	1.40937	-0.12298
1.42144	166.658	1.45264	16.3726	1.40827	-0.14268
1.42244	167.466	1.45334	16.9226	1.40757	-0.16461
1.42434	169.446	1.45444	16.8473	1.40577	-0.14442
1.42504	169.639	1.45554	17.5667	1.40397	-0.10417
1.42624	170.225	1.45634	17.2383	1.40267	-0.14657
1.42714	170.665	1.45754	18.0972	1.40217	-0.09687
1.42824	171.874	1.45854	17.8876	1.40197	-0.0362
1.42904	172.929	1.45954	18.8231	1.40097	-0.07539
1.43024	173.426	1.46034	18.5219	1.40007	-0.12288
1.43104	174.014	1.46174	19.3169	1.40007	-0.01193
1.43164	174.91	1.46284	18.9646	1.39936	-0.03277
1.43354	175.948	1.46364	19.6721	1.39867	-0.1269
1.43404	176.618	1.46444	19.2993	1.39797	-0.05741
1.43504	177.097	1.46564	20.235	1.39687	-0.08473
1.43634	178.318	1.46624	19.8877	1.39667	-0.13353
1.43694	180.022	1.46774	20.5125	1.39567	-0.1355
1.43794	179.7	1.46874	20.5399	1.39457	-0.11541
1.43904	181.056	1.46974	20.8688	1.39287	-0.18623
1.44004	182.047	1.47054	21.0256	1.39167	-0.23818
1.44064	182.403	1.47174	21.36	1.38997	-0.17838
1.44144	184.431	1.47244	21.6224	1.38897	-0.1965
1.44224	187.151	1.47334	21.6645	1.38777	-0.25329
1.44284	186.554	1.47484	22.0926	1.38597	-0.22452
1.44404	188.022	1.47554	22.2506	1.38407	-0.17168
1.44454	191.181	1.47624	22.4619	1.38317	-0.21316
1.44544	192.638	1.47754	23.0407	1.38207	-0.17784
1.44684	195.294	1.47834	23.3244	1.38157	-0.10358
1.44734	196.762	1.47934	23.5307	1.38087	-0.13906
1.44834	198.946	1.48034	23.7883	1.38037	-0.17266
1.44904	201.312	1.48154	24.1354	1.37947	-0.09303
1.45084	203.717	1.48244	24.5479	1.37857	-0.11714
1.45084	205.863	1.48314	24.7409	1.37867	-0.14706
1.45134	206.731	1.48464	25.2512	1.37777	-0.11352
1.45274	212.001	1.48564	25.5068	1.37687	-0.12814
1.45324	211.879	1.48634	25.6262	1.37697	-0.1863
1.45424	216.46	1.48724	26.0294	1.37597	-0.19495
1.45534	219.229	1.48834	26.5253	1.37427	-0.1905
1.45604	222.474	1.48914	27.1347	1.37297	-0.25873
1.45694	225.039	1.49024	27.4852	1.37187	-0.30383
1.45734	227.935	1.49134	28.2355	1.37017	-0.25837
1.45834	230.646	1.49204	28.6098	1.36787	-0.28192
1.45934	236.741	1.49324	29.1932	1.36727	-0.35274
1.45944	238.72	1.49414	30.0773	1.36617	-0.26417
1.46084	242.519	1.49504	30.5185	1.36417	-0.26405
1.46174	247.937	1.49634	31.3534	1.36287	-0.30608
1.46244	250.77	1.49734	31.957	1.36147	-0.28804
1.46364	254.728	1.49824	32.3469	1.36107	-0.15966
1.46434	257.926	1.49924	33.0679	1.36067	-0.19211
1.46504	263.245	1.50004	33.8693	1.36067	-0.22451
1.46564	268.541	1.50084	34.6324	1.35957	-0.15311
1.46674	273.166	1.50184	35.5221	1.35857	-0.19074
1.46694	277.132	1.50304	36.1337	1.35857	-0.21904
1.46854	281.103	1.50374	37.0575	1.35797	-0.18977
1.46984	288.564	1.50464	37.9141	1.35697	-0.18334
1.47014	294.402	1.50564	39.204	1.35637	-0.28804
1.47054	298.807	1.50664	40.0578	1.35537	-0.30367
1.47124	303.343	1.50754	41.2944	1.35397	-0.25823
1.47224	310.015	1.50854	42.1367	1.35297	-0.34305
1.47314	315.094	1.50994	43.6365	1.35167	-0.42324
1.47424	323.081	1.51054	44.481	1.34967	-0.40318
1.47494	326.673	1.51114	45.6816	1.34787	-0.40336
1.47504	334.824	1.51194	47.0627	1.34717	-0.48867
1.47614	339.402	1.51294	48.4142	1.34637	-0.38998
1.47704	347.809	1.51404	49.9616	1.34427	-0.38745
1.47744	352.283	1.51484	51.3619	1.34317	-0.45695
1.47844	360.549	1.51604	52.9244	1.34177	-0.44314
1.47894	366.238	1.51674	54.6821	1.34057	-0.31307
1.47994	377.448	1.51714	55.9825	1.34037	-0.32773
1.48034	380.231	1.51804	58.0688	1.34027	-0.32916
1.48084	389.733	1.51904	59.7278	1.33927	-0.30438
1.48214	397.427	1.52014	61.8107	1.33857	-0.2623
1.48244	407.849	1.52094	63.647	1.33857	-0.34052
1.48344	412.548	1.52174	66.0066	1.33827	-0.32174
1.48434	423.806	1.52274	68.0937	1.33677	-0.31727
1.48484	432.899	1.52364	70.3441	1.33567	-0.46194
1.48534	440.559	1.52424	72.3423	1.33547	-0.44773
1.48584	448.789	1.52544	74.9144	1.33427	-0.4017
1.48684	459.531	1.52624	77.3878	1.33277	-0.54704
1.48734	468.006	1.52664	80.0783	1.33117	-0.64917
1.48764	478.022	1.52774	82.4223	1.32977	-0.66754
1.48894	488.026	1.52854	85.7804	1.32877	-0.59078
1.48984	498.922	1.52934	87.9129	1.32737	-0.81124
1.48994	509.624	1.53064	91.577	1.32597	-0.70979
1.49104	523.879	1.53144	94.0326	1.32387	-0.7031
1.49194	533.627	1.53264	97.2171	1.32287	-0.72425
1.49134	544.205	1.53264	100.076	1.32207	-0.66289
1.49264	555.109	1.53404	103.084	1.32087	-0.52163
1.49354	569.951	1.53504	106.729	1.32027	-0.55943
1.49424	577.409	1.53534	109.418	1.32007	-0.53296
1.49524	593.087	1.53614	113.382	1.31947	-0.47265
1.49634	604.519	1.53704	116.708	1.31857	-0.43779
1.49674	615.514	1.53824	120.725	1.31857	-0.54489
1.49714	626.418	1.53904	124.295	1.31757	-0.48554
1.49784	640.611	1.54014	128.034	1.31637	-0.53394
1.49774	651.977	1.54074	131.88	1.31637	-0.57233
1.49824	667.403	1.54164	135.597	1.31497	-0.65397
1.49944	677.444	1.54244	139.978	1.31407	-0.6439
1.50044	691.07	1.54284	143.66	1.31347	-0.69923
1.50084	703.196	1.54364	148.187	1.31117	-0.92308
1.50134	723.141	1.54494	152.752	1.30977	-0.98482
1.50214	738.875	1.54554	157.506	1.30907	-0.87483
1.50284	753.835	1.54654	161.815	1.30737	-1.1291
1.50314	762.984	1.54754	166.694	1.30597	-1.04501
1.50424	785.734	1.54804	171.088	1.30417	-0.97389
1.50504	793.816	1.54894	176.128	1.30207	-1.03039
1.50604	814.815	1.54974	180.935	1.30177	-0.95189
1.50614	826.947	1.55064	186.175	1.30117	-0.69019
1.50684	842.537	1.55174	191.01	1.30007	-0.79899
1.50744	859.028	1.55224	196.812	1.29997	-0.75165
1.50774	871.355	1.55304	201.223	1.29967	-0.6888
1.50944	894.782	1.55384	207.121	1.29847	-0.64217
1.50904	904.823	1.55464	212.109	1.29787	-0.78044
1.51004	922.856	1.55534	218.353	1.29747	-0.68325
1.51134	944.525	1.55624	223.718	1.29687	-0.70202
1.51174	958.782	1.55714	230.481	1.29637	-0.77495
1.51264	978.299	1.55774	235.754	1.29527	-0.91278
1.51384	995.807	1.55864	242.066	1.29397	-0.87046
1.51434	1016.82	1.55944	248.492	1.29277	-1.05167
1.51404	1020.38	1.56094	254.935	1.29187	-1.14589
1.51464	1048.59	1.56134	260.525	1.28977	-1.25578
1.51534	1058.25	1.56184	266.18	1.28817	-1.25229
1.51624	1081.88	1.56224	273.854	1.28717	-1.40966
1.51664	1108.28	1.56354	281.019	1.28617	-1.28946
1.51564	1116.9	1.56444	288.676	1.28427	-1.30952
1.51584	1138.64	1.56554	295.712	1.28287	-1.35427
1.51764	1162.39	1.56644	303.458	1.28187	-1.34591
1.51724	1170.18	1.56714	309.294	1.28077	-1.14632
1.51864	1198.03	1.56804	316.391	1.27997	-1.19372
1.51984	1222.37	1.56884	322.901	1.28027	-1.09542
		1.56974	331.022	1.27937	-1.05668
		1.57084	337.779	1.27877	-1.03528
		1.57124	346.306	1.27827	-1.08965
		1.57164	352.919	1.27717	-1.12193
		1.57244	361.752	1.27687	-1.06017
		1.57364	367.831	1.27637	-1.12785
		1.57414	376.133	1.27527	-1.2831
		1.57504	383.516	1.27457	-1.26998
		1.57514	395.991	1.27267	-1.45601
		1.57634	403.051	1.27167	-1.63698
		1.57704	414.434	1.27037	-1.60974
		1.57784	421.592	1.26847	-1.82338
		1.57934	433.6	1.26757	-1.85251
		1.57994	439.084	1.26577	-1.88682
		1.58044	449.796	1.26427	-1.83904
		1.58094	457.174	1.26277	-1.82933
		1.58224	467.198	1.26197	-1.81475
		1.58284	475.861	1.26157	-1.5967
		1.58394	487.405	1.25997	-1.66074
		1.58504	494.893	1.25967	-1.61773
		1.58544	507.314	1.25937	-1.47614
		1.58614	515.676	1.25867	-1.41913
		1.58734	526.758	1.25837	-1.47521
		1.58804	533.511	1.25757	-1.42828
		1.58894	542.402	1.25657	-1.41854
		1.58964	550.928	1.25607	-1.45247
		1.59074	565.195	1.25547	-1.52455
		1.59094	574.346	1.25447	-1.50164
		1.59204	583.159	1.25287	-1.60871
		1.59264	594.347	1.25177	-1.68616
		1.59394	607.57	1.25017	-1.69373
		1.59514	630.129	1.24847	-1.72058
		1.59504	639.589	1.24687	-1.76546
		1.59604	652.154	1.24577	-1.68591
		1.59684	663.435	1.24427	-1.57086
		1.59834	674.625	1.24167	-1.55125
		1.59914	687.573	1.24157	-1.49289
		1.59934	698.62	1.24197	-1.21076
		1.60054	709.329	1.23997	-1.25528
		1.60084	720.408	1.23937	-1.19895
		1.60164	732.705	1.23927	-1.07373
		1.60254	743.865	1.23897	-0.96259
		1.60344	758.319	1.23817	-0.98294
		1.60434	770.686	1.23717	-0.93971
		1.60494	783.16	1.23647	-0.8584
		1.60584	795.799	1.23607	-0.83492
		1.60694	807.777	1.23507	-0.84862
		1.60714	816.455	1.23427	-0.7757
		1.60814	831.361	1.23257	-0.75737
		1.60804	840.978	1.23087	-0.8099
		1.60894	855.615	1.22967	-0.72318
		1.60944	869.389	1.22817	-0.68008
		1.61004	879.564	1.22717	-0.65899
		1.61094	896.414	1.22477	-0.63034
		1.61214	910.752	1.22367	-0.53085
		1.61244	927.129	1.22277	-0.47831
		1.61444	950.033	1.22167	-0.47604
		1.61414	961.877	1.22147	-0.36619
		1.61534	970.641	1.22017	-0.35992
		1.61654	989.557	1.21947	-0.36399
		1.61744	996.871	1.21897	-0.31601
		1.61834	1012.52	1.21847	-0.25373
		1.61844	1023.61	1.21797	-0.28337
		1.61954	1036.53	1.21737	-0.26841
		1.61964	1049.24	1.21637	-0.23152
		1.62114	1065.88	1.21617	-0.23782
		1.62114	1072.48	1.21567	-0.26578
		1.62144	1085.59	1.21427	-0.2302
		1.62304	1109.98	1.21247	-0.2551
		1.62394	1124.34	1.21147	-0.27949
		1.62514	1144	1.20977	-0.26753
		1.62544	1156.66	1.20787	-0.24602
		1.62594	1173.17	1.20687	-0.27098
		1.62664	1185.2	1.20517	-0.26605
		1.62734	1193.54	1.20417	-0.21889
		1.62824	1204.67	1.20287	-0.20708
				1.20157	-0.2422
				1.20147	-0.17552
				1.20057	-0.17208
				1.20017	-0.19399
				1.19917	-0.18269
				1.19827	-0.14314
				1.19807	-0.164
				1.19747	-0.16904
				1.19667	-0.14267
				1.19617	-0.14896
				1.19517	-0.18777
				1.19407	-0.16058
				1.19277	-0.1569
				1.19107	-0.1992
				1.18967	-0.19257
				1.18847	-0.15622
				1.18667	-0.19618
				1.18557	-0.19175
				1.18417	-0.15217
				1.18287	-0.16141
				1.18177	-0.17822
				1.18087	-0.13832
				1.17997	-0.13272
				1.17987	-0.15086
				1.17917	-0.13195
				1.17827	-0.11067
				1.17847	-0.1281
				1.17757	-0.13531
				1.17617	-0.11387
				1.17607	-0.1196
				1.17567	-0.14452
				1.17417	-0.1253
				1.17227	-0.12814
				1.17107	-0.15933
				1.16997	-0.14499
				1.16787	-0.13111
				1.16687	-0.15357
				1.16597	-0.15224
				1.16407	-0.12331
				1.16257	-0.13896
				1.16157	-0.14765
				1.16077	-0.11532
				1.16027	-0.1027
				1.15987	-0.12633
				1.15947	-0.11642
				1.15797	-0.0907
				1.15797	-0.10992
				1.15777	-0.11556
				1.15637	-0.09827
				1.15557	-0.10084
				1.15517	-0.12634
				1.15397	-0.10827
				1.15257	-0.10421
				1.15067	-0.13482
				1.14927	-0.13624
				1.14807	-0.10795
				1.14687	-0.12772
				1.14537	-0.13787
				1.14417	-0.10561
				1.14267	-0.11206
				1.14087	-0.13028
				1.14077	-0.10192
				1.14057	-0.08092
				1.13967	-0.11363
				1.13897	-0.10359
				1.13817	-0.07649
				1.13817	-0.09385
				1.13747	-0.10512
				1.13637	-0.08273
				1.13577	-0.08878
				1.13517	-0.11254
				1.13397	-0.09753
				1.13257	-0.09091
				1.13077	-0.12165
				1.12957	-0.11675
				1.12847	-0.09366
				1.12677	-0.11704
				1.12517	-0.12664
				1.12417	-0.09304
				1.12227	-0.09913
				1.12117	-0.11733
				1.12127	-0.08641
				1.12057	-0.07904
				1.11967	-0.10307
				1.11887	-0.09609
				1.11807	-0.07096
				1.11777	-0.08556
				1.11747	-0.09618
				1.11647	-0.07615
				1.11567	-0.07831
				1.11517	-0.10429
				1.11387	-0.09012
				1.11197	-0.08331
				1.11117	-0.10773
				1.10997	-0.10557
				1.10767	-0.09029
				1.10657	-0.10418
				1.10537	-0.11302
				1.10357	-0.08687
				1.10207	-0.08856
				1.10127	-0.10185
				1.10137	-0.08285
				1.10097	-0.06754
				1.09917	-0.09934
				1.09887	-0.09062
				1.09827	-0.06266
				1.09807	-0.07807
				1.09737	-0.08973
				1.09587	-0.07533
				1.09577	-0.07021
				1.09517	-0.09389
				1.09377	-0.08752
				1.09207	-0.07747
				1.09117	-0.09724
				1.08927	-0.10423
				1.08767	-0.08194
				1.08637	-0.09323
				1.08537	-0.10575
				1.08407	-0.08238
				1.08217	-0.08171
				1.08127	-0.10214
				1.08147	-0.07543
				1.08007	-0.07046
				1.07957	-0.09051
				1.07927	-0.08354
				1.07777	-0.06491
				1.07757	-0.07484
				1.07727	-0.08373
				1.07617	-0.06831
				1.07547	-0.06893
				1.07527	-0.09048
				1.07417	-0.07904
				1.07217	-0.07482
				1.07087	-0.0965
				1.06907	-0.09832
				1.06837	-0.07903
				1.06697	-0.08992
				1.06417	-0.10848
				1.06357	-0.07901
				1.06307	-0.07359
				1.06127	-0.09845
				1.06057	-0.08193
				1.06007	-0.06517
				1.05957	-0.08166
				1.05857	-0.08601
				1.05807	-0.06167
				1.05767	-0.06826

## Sheet: Fig. 2b
NiFe-SQ/NF-R	NiFe-SQ/NF-R	NiFe-LDH/NF-R	NiFe-LDH/NF-R	NF-R	NF-R
x	y	x	y	x	y
2.80474	1.49824	1.51941	1.49924	2.42568	1.79388
2.79664	1.49774	1.5505	1.50184	2.39942	1.79178
2.78882	1.49634	1.5788	1.50464	2.36718	1.78828
2.77735	1.49554	1.61589	1.50754	2.32779	1.78078
2.76722	1.49474	1.64817	1.51054	2.30586	1.77528
2.75229	1.49364	1.68497	1.51294	2.27958	1.77018
2.74427	1.49364	1.72366	1.51604	2.26194	1.76838
2.73312	1.49274	1.76394	1.51804	2.23566	1.76368
2.72071	1.49144	1.80378	1.52094	2.20217	1.75738
2.70547	1.49084	1.84723	1.52364	2.18264	1.75288
2.69175	1.48964	1.88867	1.52624	2.16424	1.74928
2.67447	1.48804	1.93339	1.52854	2.14298	1.74648
2.66499	1.48734	1.97328	1.53144	2.12767	1.74268
2.64725	1.48674	2.01319	1.53404	2.09329	1.73638
2.63781	1.48504	2.05454	1.53614	2.07638	1.73098
2.61973	1.48414	2.09445	1.53904	2.06385	1.72738
2.60535	1.48324	2.13225	1.54164	2.04685	1.72538
2.58737	1.48274	2.17081	1.54364	2.02453	1.72128
2.57032	1.48134	2.20902	1.54654	2.00033	1.71558
2.54853	1.47964	2.24583	1.54894	1.97872	1.71008
2.53545	1.47974	2.28106	1.55174	1.96577	1.70748
2.51283	1.47764	2.31622	1.55384	1.95063	1.70458
2.49502	1.47634	2.3497	1.55624	1.92636	1.70088
2.47165	1.47454	2.38393	1.55864	1.90269	1.69518
2.45445	1.47354	2.41585	1.56134	1.88288	1.69058
2.42921	1.47204	2.44874	1.56354	1.87444	1.68728
2.40671	1.47094	2.4821	1.56644	1.85684	1.68408
2.38367	1.46974	2.50907	1.56884	1.83533	1.67998
2.35871	1.46854	2.53946	1.57124	1.80367	1.67398
2.33205	1.46694	2.56565	1.57364	1.78536	1.66938
2.30458	1.46514	2.59769	1.57514	1.77365	1.66588
2.27602	1.46354	2.62489	1.57784	1.75688	1.66338
2.25236	1.46184	2.65302	1.58044	1.73271	1.65958
2.22187	1.46044	2.67748	1.58284	1.7032	1.65378
2.18973	1.45894	2.70528	1.58544	1.68	1.64918
2.15756	1.45714	2.72714	1.58804	1.6678	1.64608
2.12614	1.45624	2.7522	1.59074	1.64914	1.64258
2.09288	1.45484	2.77404	1.59264	1.62599	1.64028
2.05922	1.45314	2.8059	1.59504	1.58272	1.63438
2.01877	1.45104	2.82906	1.59834	1.56724	1.62918
1.98318	1.44924	2.85085	1.60054	1.54857	1.62678
1.94143	1.44774	2.87149	1.60254	1.52835	1.62368
1.9044	1.44654	2.89385	1.60494	1.49473	1.61938
1.8603	1.44494	--
1.8178	1.44284	--
1.76715	1.44114	--
1.72542	1.43994	--
1.67327	1.43864	--
1.62208	1.43684	--
1.55837	1.43534	--
1.50698	1.43344	--
1.42991	1.43204	--
1.3812	1.43054	--
		--
		--
		--
		--
		--
		--
		--
		--
		--
		--
		--
--
--
--
--
--
--
--
--
--
--
--
--
--
--
--
--
--
--
--
--
--
--
--
--
--
--
--
--
--
--
--
--
--
--
--
--
--
--
--
--
--
--
--
--
--
--
--
--
--
--
--
--
--
--
--
--
--
--
--
--
--
--
--
--
--

## Sheet: Fig. 2c
NiFe-SQ/NF-R	NiFe-SQ/NF-R	NiFe-LDH/NF-R	NiFe-LDH/NF-R	NF-R	NF-R
x	y	x	y	x	y
0.80322	5.948e-05	0.89218	0.00028558	0.98628	0.0004628
0.80323	6.656e-05	0.89221	0.0003178	0.98631	0.00054106
0.80324	7.4483e-05	0.89225	0.00035364	0.98635	0.00063255
0.80324	8.3348e-05	0.89228	0.00039353	0.98639	0.00073952
0.80325	9.3268e-05	0.89233	0.00043792	0.98644	0.00086457
0.80326	0.00010437	0.89237	0.00048731	0.9865	0.00101
0.80327	0.00011679	0.89243	0.00054226	0.98657	0.00118
0.80328	0.00013069	0.89248	0.00060341	0.98665	0.00138
0.8033	0.00014624	0.89255	0.00067144	0.98675	0.00162
0.80331	0.00016364	0.89262	0.00074714	0.98686	0.00189
0.80333	0.00018311	0.8927	0.00083136	0.98699	0.00221
0.80335	0.00020489	0.89279	0.00092506	0.98714	0.00258
0.80337	0.00022926	0.89289	0.00103	0.98732	0.00302
0.80339	0.00025653	0.893	0.00115	0.98753	0.00353
0.80342	0.00028703	0.89312	0.00127	0.98777	0.00412
0.80345	0.00032116	0.89326	0.00142	0.98805	0.00482
0.80348	0.00035934	0.89341	0.00158	0.98838	0.00564
0.80352	0.00040205	0.89358	0.00176	0.98877	0.00659
0.80356	0.00044983	0.89377	0.00195	0.98923	0.0077
0.80361	0.00050327	0.89398	0.00217	0.98976	0.00901
0.80366	0.00056305	0.89422	0.00242	0.99038	0.01053
0.80372	0.0006299	0.89448	0.00269	0.9911	0.01231
0.80379	0.00070467	0.89477	0.00299	0.99195	0.01439
0.80386	0.00078829	0.89509	0.00333	0.99294	0.01682
0.80394	0.00088179	0.89545	0.0037	0.9941	0.01967
0.80404	0.00098633	0.89585	0.00412	0.99546	0.02299
0.80414	0.0011	0.89629	0.00458	0.99705	0.02688
0.80425	0.00123	0.89679	0.00509	0.9989	0.03142
0.80438	0.00138	0.89734	0.00566	1.0011	0.03673
0.80453	0.00154	0.89795	0.00629	1.0036	0.04294
0.80469	0.00173	0.89863	0.007	1.0066	0.05019
0.80487	0.00193	0.89939	0.00778	1.0101	0.05867
0.80507	0.00216	0.90023	0.00864	1.0141	0.06858
0.8053	0.00241	0.90117	0.0096	1.0189	0.08016
0.80556	0.00269	0.90222	0.01067	1.0244	0.0937
0.80584	0.00301	0.90339	0.01186	1.0309	0.10951
0.80616	0.00336	0.90468	0.01317	1.0386	0.12799
0.80652	0.00376	0.90612	0.01463	1.0475	0.14958
0.80692	0.0042	0.90773	0.01624	1.058	0.1748
0.80736	0.00469	0.90951	0.01802	1.0702	0.20426
0.80786	0.00523	0.9115	0.02	1.0846	0.23867
0.80842	0.00584	0.91372	0.02218	1.1014	0.27884
0.80905	0.00651	0.91618	0.0246	1.1212	0.32574
0.80975	0.00726	0.91892	0.02726	1.1444	0.38047
0.81054	0.0081	0.92197	0.0302	1.1716	0.44433
0.81142	0.00902	0.92536	0.03345	1.2036	0.51882
0.81241	0.01004	0.92913	0.03701	1.2413	0.60565
0.81352	0.01118	0.93333	0.04094	1.2856	0.70684
0.81475	0.01243	0.938	0.04525	1.3379	0.82468
0.81614	0.01382	0.9432	0.04997	1.3996	0.96183
0.81769	0.01535	0.94897	0.05514	1.4725	1.1213
0.81943	0.01702	0.95539	0.06078	1.5588	1.3066
0.82137	0.01887	0.96252	0.06693	1.6611	1.5216
0.82354	0.02089	0.97043	0.07362	1.7826	1.7707
0.82597	0.02309	0.97922	0.08087	1.9271	2.0589
0.82869	0.0255	0.98897	0.0887	2.0994	2.3916
0.83173	0.0281	0.99977	0.09714	2.3053	2.7748
0.83511	0.03092	1.01172	0.10618	2.5516	3.2148
0.83889	0.03395	1.02494	0.11585	2.8471	3.7183
0.84309	0.0372	1.03954	0.12611	3.2021	4.2919
0.84777	0.04065	1.05563	0.13695	3.629	4.9419
0.85295	0.0443	1.07332	0.14834	4.1429	5.6736
0.85869	0.04814	1.09275	0.1602	4.7614	6.4906
0.86503	0.05212	1.114	0.17245	5.5049	7.3935
0.872	0.05623	1.1372	0.185	6.3966	8.3791
0.87964	0.06042	1.1624	0.19771	7.4612	9.4379
0.88798	0.06462	1.1897	0.21042	8.7245	10.553
0.89704	0.06878	1.2191	0.22295	10.21	11.699
0.90681	0.07282	1.2507	0.2351	11.937	12.839
0.9173	0.07667	1.2843	0.24665	13.916	13.928
0.92847	0.08022	1.3199	0.25736	16.142	14.91
0.94027	0.08341	1.3574	0.26699	18.595	15.728
0.95264	0.08613	1.3965	0.27532	21.233	16.328
0.96549	0.08831	1.4371	0.28214	23.998	16.664
0.97872	0.08989	1.4788	0.28726	26.816	16.711
0.99219	0.09081	1.5214	0.29055	29.606	16.465
1.00578	0.09105	1.5643	0.2919	32.292	15.946
1.01934	0.0906	1.6074	0.29129	34.81	15.192
1.03275	0.08946	1.6501	0.28872	37.111	14.256
1.04587	0.08769	1.6922	0.28427	39.17	13.195
1.05858	0.08533	1.7332	0.27807	40.977	12.066
1.07078	0.08245	1.7729	0.27028	42.538	10.918
1.0824	0.07914	1.8111	0.26111	43.87	9.7893
1.09335	0.07549	1.8474	0.25077	44.995	8.7101
1.1036	0.07157	1.8818	0.23951	45.94	7.6998
1.1132	0.06749	1.9141	0.22756	46.728	6.7698
1.122	0.0633	1.9443	0.21515	47.384	5.9253
1.1301	0.0591	1.9724	0.20248	47.929	5.1667
1.1375	0.05493	1.9984	0.18975	48.382	4.4911
1.1443	0.05086	2.0224	0.17713	48.759	3.8937
1.1505	0.04692	2.0443	0.16475	49.072	3.3685
1.156	0.04314	2.0644	0.15273	49.333	2.9089
1.161	0.03955	2.0828	0.14116	49.551	2.5083
1.1656	0.03616	2.0994	0.13011	49.733	2.1601
1.1696	0.03298	2.1146	0.11962	49.886	1.8583
1.1733	0.03001	2.1283	0.10973	50.015	1.5972
1.1766	0.02726	2.1407	0.10046	50.123	1.3719
1.1795	0.02472	2.1519	0.09179	50.214	1.1775
1.1821	0.02238	2.1621	0.08374	50.291	1.0102
1.1845	0.02024	2.1712	0.07627	50.356	0.86627
1.1866	0.01827	2.1794	0.06938	50.411	0.74257

## Sheet: Fig. 2d
			Overpotential		Overpotential		Overpotential
	NiFe-SQ/NF-R	at 100 mA cm-2	220 mV	at 500 mA cm-2	259 mV	at 1000 mA cm-2	284 mV
	NiFe-LDH/NF-R	at 100 mA cm-2	300 mV	at 500 mA cm-2	355 mV	at 1000 mA cm-2	388 mV

## Sheet: Fig. 2e
NiFe-SQ/NF-R	NiFe-SQ/NF-R	NiFe-LDH/NF-R	NiFe-LDH/NF-R
x	y	x	y
0.00278	2.46132	0	3.24789
0.00556	2.46114	0.00139	3.27493
0.00833	2.4973	0.00278	3.30442
0.01111	2.48769	0.00417	3.26632
0.01389	2.47874	0.00556	3.3097
0.01667	2.48338	0.00694	3.33132
0.01944	2.50036	0.00833	3.34467
0.02222	2.47302	0.00972	3.33416
0.025	2.50607	0.01111	3.32425
0.02778	2.48151	0.0125	3.35821
0.03056	2.49282	0.01389	3.341
0.03333	2.5111	0.01528	3.31399
0.03611	2.5012	0.01667	3.29976
0.03889	2.4654	0.01806	3.30503
0.04167	2.48214	0.01944	3.29921
0.04444	2.47106	0.02083	3.35515
0.04722	2.49231	0.02222	3.30043
0.05	2.46158	0.02361	3.33962
0.05278	2.4757	0.025	3.35861
0.05556	2.48276	0.02639	3.28239
0.05833	2.50306	0.02778	3.32201
0.06111	2.52448	0.02917	3.33395
0.06389	2.461	0.03056	3.3222
0.06667	2.4921	0.03194	3.29595
0.06944	2.50448	0.03333	3.32587
0.07222	2.49005	0.03472	3.30847
0.075	2.51	0.03611	3.34635
0.07778	2.51956	0.0375	3.331
0.08056	2.52583	0.03889	3.33498
0.08333	2.49894	0.04028	3.36139
0.08611	2.53431	0.04167	3.33459
0.08889	2.51154	0.04306	3.34173
0.09167	2.47648	0.04444	3.34248
0.09444	2.51002	0.04583	3.3718
0.09722	2.48593	0.04722	3.34814
0.1	2.46894	0.04861	3.30413
0.10278	2.4792	0.05	3.35088
0.10556	2.45082	0.05139	3.29685
0.10833	2.4901	0.05278	3.36699
0.11111	2.48461	0.05417	3.34484
0.11389	2.50715	0.05556	3.30345
0.11667	2.47738	0.05694	3.33005
0.11944	2.49339	0.05833	3.34756
0.12222	2.47173	0.05972	3.33542
0.125	2.49621	0.06111	3.33282
0.12778	2.47487	0.0625	3.32439
0.13056	2.46401	0.06389	3.3408
0.13333	2.54152	0.06528	3.35271
0.13611	2.48235	0.06667	3.33586
0.13889	2.47929	0.06806	3.31396
0.14167	2.46458	0.06944	3.34436
0.14444	2.49324	0.07083	3.33059
0.14722	2.50066	0.07222	3.30114
0.15	2.48721	0.07361	3.34803
0.15278	2.47636	0.075	3.38218
0.15556	2.53124	0.07639	3.30546
0.15833	2.47643	0.07778	3.35513
0.16111	2.47485	0.07917	3.36137
0.16389	2.48902	0.08056	3.35116
0.16667	2.51173	0.08194	3.3159
0.16944	2.49542	0.08333	3.33511
0.17222	2.5056	0.08472	3.33111
0.175	2.49355	0.08611	3.34444
0.17778	2.51762	0.0875	3.29786
0.18056	2.49217	0.08889	3.30173
0.18333	2.44505	0.09028	3.30252
0.18611	2.46589	0.09167	3.36062
0.18889	2.45599	0.09306	3.31953
0.19167	2.50988	0.09444	3.36108
0.19444	2.49959	0.09583	3.34342
0.19722	2.50179	0.09722	3.32269
0.2	2.50609	0.09861	3.31063
0.20278	2.45497	0.1	3.33365
0.20556	2.51717	0.10139	3.32439
0.20833	2.4648	0.10278	3.36402
0.21111	2.48054	0.10417	3.28908
0.21389	2.47454	0.10556	3.34539
0.21667	2.46981	0.10694	3.33282
0.21944	2.48527	0.10833	3.31584
0.22222	2.5185	0.10972	3.32482
0.225	2.46035	0.11111	3.36095
0.22778	2.48266	0.1125	3.3616
0.23056	2.46213	0.11389	3.35891
0.23333	2.51564	0.11528	3.33468
0.23611	2.48789	0.11667	3.36203
0.23889	2.49215	0.11806	3.27603
0.24167	2.48103	0.11944	3.33115
0.24444	2.48032	0.12083	3.36087
0.24722	2.48627	0.12222	3.32576
0.25	2.48699	0.12361	3.33455
0.25278	2.47487	0.125	3.33467
0.25556	2.5001	0.12639	3.3356
0.25833	2.48987	0.12778	3.36294
0.26111	2.491	0.12917	3.31241
0.26389	2.46807	0.13056	3.3404
0.26667	2.44328	0.13194	3.35624
0.26944	2.4841	0.13333	3.34324
0.27222	2.47956	0.13472	3.35005
0.275	2.48	0.13611	3.31333
0.27778	2.48076	0.1375	3.36135
0.28056	2.46285	0.13889	3.38643
0.28333	2.45412	0.14028	3.3238
0.28611	2.49086	0.14167	3.3562
0.28889	2.47237	0.14306	3.36599
0.29167	2.48564	0.14444	3.3781
0.29444	2.48579	0.14583	3.34297
0.29722	2.44933	0.14722	3.32504
0.3	2.49567	0.14861	3.32436
0.30278	2.50805	0.15	3.34564
0.30556	2.48907	0.15139	3.33125
0.30833	2.4548	0.15278	3.34127
0.31111	2.48356	0.15417	3.35574
0.31389	2.48165	0.15556	3.31795
0.31667	2.4649	0.15694	3.34153
0.31944	2.46833	0.15833	3.38125
0.32222	2.47483	0.15972	3.36419
0.325	2.49049	0.16111	3.34673
0.32778	2.49278	0.1625	3.37024
0.33056	2.48432	0.16389	3.3278
0.33333	2.50288	0.16528	3.34355
0.33611	2.47166	0.16667	3.36384
0.33889	2.49557	0.16806	3.31612
0.34167	2.53192	0.16944	3.33708
0.34444	2.49725	0.17083	3.33597
0.34722	2.45577	0.17222	3.33397
0.35	2.49031	0.17361	3.32344
0.35278	2.46746	0.175	3.37677
0.35556	2.47541	0.17639	3.34176
0.35833	2.46194	0.17778	3.29138
0.36111	2.46271	0.17917	3.33512
0.36389	2.48616	0.18056	3.34663
0.36667	2.47017	0.18194	3.32863
0.36944	2.47063	0.18333	3.31603
0.37222	2.46314	0.18472	3.35539
0.375	2.48385	0.18611	3.34298
0.37778	2.50461	0.1875	3.30685
0.38056	2.48595	0.18889	3.33004
0.38333	2.49481	0.19028	3.31145
0.38611	2.48622	0.19167	3.3102
0.38889	2.4694	0.19306	3.35647
0.39167	2.4624	0.19444	3.33408
0.39444	2.49179	0.19583	3.38243
0.39722	2.48221	0.19722	3.33086
0.4	2.45566	0.19861	3.33319
0.40278	2.47507	0.2	3.31009
0.40556	2.48297	0.20139	3.32092
0.40833	2.5002	0.20278	3.35161
0.41111	2.46877	0.20417	3.30396
0.41389	2.47662	0.20556	3.34345
0.41667	2.50602	0.20694	3.36165
0.41944	2.46706	0.20833	3.36583
0.42222	2.4946	0.20972	3.34072
0.425	2.49958	0.21111	3.32098
0.42778	2.49319	0.2125	3.35622
0.43056	2.51745	0.21389	3.34108
0.43333	2.47652	0.21528	3.35101
0.43611	2.45744	0.21667	3.31847
0.43889	2.49606	0.21806	3.3329
0.44167	2.5067	0.21944	3.33006
0.44444	2.46812	0.22083	3.34505
0.44722	2.48995	0.22222	3.30206
0.45	2.47953	0.22361	3.32807
0.45278	2.47129	0.225	3.36588
0.45556	2.44815	0.22639	3.31961
0.45833	2.46669	0.22778	3.34964
0.46111	2.4718	0.22917	3.34312
0.46389	2.48103	0.23056	3.33817
0.46667	2.48388	0.23194	3.32629
0.46944	2.48948	0.23333	3.31684
0.47222	2.48983	0.23472	3.32622
0.475	2.49112	0.23611	3.34928
0.47778	2.48607	0.2375	3.32947
0.48056	2.47176	0.23889	3.33285
0.48333	2.45205	0.24028	3.34712
0.48611	2.51006	0.24167	3.37012
0.48889	2.48984	0.24306	3.33732
0.49167	2.49538	0.24444	3.33487
0.49444	2.48133	0.24583	3.32533
0.49722	2.49863	0.24722	3.32673
0.5	2.47511	0.24861	3.34912
0.50278	2.45845	0.25	3.33497
0.50556	2.47434	0.25139	3.31687
0.50833	2.48065	0.25278	3.33454
0.51111	2.49149	0.25417	3.33268
0.51389	2.44865	0.25556	3.32349
0.51667	2.48187	0.25694	3.35281
0.51944	2.48772	0.25833	3.2998
0.52222	2.47698	0.25972	3.34198
0.525	2.46016	0.26111	3.34671
0.52778	2.47275	0.2625	3.29849
0.53056	2.4727	0.26389	3.32889
0.53333	2.49439	0.26528	3.32876
0.53611	2.47256	0.26667	3.30491
0.53889	2.49372	0.26806	3.30492
0.54167	2.50133	0.26944	3.34076
0.54444	2.47295	0.27083	3.31957
0.54722	2.4746	0.27222	3.35582
0.55	2.49985	0.27361	3.31668
0.55278	2.46416	0.275	3.3232
0.55556	2.46051	0.27639	3.33138
0.55833	2.4824	0.27778	3.36751
0.56111	2.48304	0.27917	3.30818
0.56389	2.48652	0.28056	3.33699
0.56667	2.4977	0.28194	3.34782
0.56944	2.47124	0.28333	3.35468
0.57222	2.46304	0.28472	3.31829
0.575	2.49882	0.28611	3.32738
0.57778	2.47386	0.2875	3.33915
0.58056	2.48313	0.28889	3.2993
0.58333	2.50359	0.29028	3.35143
0.58611	2.47042	0.29167	3.33247
0.58889	2.49823	0.29306	3.33006
0.59167	2.47019	0.29444	3.3153
0.59444	2.49149	0.29583	3.30861
0.59722	2.49404	0.29722	3.31518
0.6	2.4684	0.29861	3.34125
0.60278	2.48818	0.3	3.35764
0.60556	2.50222	0.30139	3.31048
0.60833	2.4845	0.30278	3.31404
0.61111	2.45161	0.30417	3.34269
0.61389	2.45654	0.30556	3.32583
0.61667	2.49479	0.30694	3.35555
0.61944	2.50487	0.30833	3.33304
0.62222	2.52045	0.30972	3.32748
0.625	2.47356	0.31111	3.35938
0.62778	2.49506	0.3125	3.32634
0.63056	2.48576	0.31389	3.3189
0.63333	2.51019	0.31528	3.31283
0.63611	2.52942	0.31667	3.35512
0.63889	2.51057	0.31806	3.35011
0.64167	2.50506	0.31944	3.32514
0.64444	2.50478	0.32083	3.3067
0.64722	2.48254	0.32222	3.33697
0.65	2.45931	0.32361	3.33234
0.65278	2.50429	0.325	3.33519
0.65556	2.49386	0.32639	3.36013
0.65833	2.49649	0.32778	3.34299
0.66111	2.49093	0.32917	3.30392
0.66389	2.49375	0.33056	3.33954
0.66667	2.46545	0.33194	3.32671
0.66944	2.50291	0.33333	3.31647
0.67222	2.47111	0.33472	3.29059
0.675	2.49502	0.33611	3.34593
0.67778	2.51458	0.3375	3.33681
0.68056	2.47764	0.33889	3.33198
0.68333	2.5068	0.34028	3.34577
0.68611	2.49938	0.34167	3.29685
0.68889	2.47139	0.34306	3.33461
0.69167	2.48604	0.34444	3.31243
0.69444	2.50482	0.34583	3.30293
0.69722	2.49677	0.34722	3.36505
0.7	2.50185	0.34861	3.30286
0.70278	2.47334	0.35	3.32325
0.70556	2.49362	0.35139	3.30639
0.70833	2.50878	0.35278	3.31773
0.71111	2.47732	0.35417	3.34415
0.71389	2.46872	0.35556	3.33176
0.71667	2.49966	0.35694	3.32385
0.71944	2.4725	0.35833	3.31654
0.72222	2.48149	0.35972	3.29331
0.725	2.48827	0.36111	3.33871
0.72778	2.5146	0.3625	3.30382
0.73056	2.4752	0.36389	3.32772
0.73333	2.50378	0.36528	3.33083
0.73611	2.47413	0.36667	3.28749
0.73889	2.48762	0.36806	3.32778
0.74167	2.48264	0.36944	3.36406
0.74444	2.48957	0.37083	3.30609
0.74722	2.47883	0.37222	3.33652
0.75	2.45264	0.37361	3.3378
0.75278	2.49536	0.375	3.31995
0.75556	2.46628	0.37639	3.32996
0.75833	2.50607	0.37778	3.32648
0.76111	2.49411	0.37917	3.29984
0.76389	2.50437	0.38056	3.32167
0.76667	2.47264	0.38194	3.35176
0.76944	2.47546	0.38333	3.32081
0.77222	2.47045	0.38472	3.2929
0.775	2.48389	0.38611	3.30429
0.77778	2.47719	0.3875	3.33226
0.78056	2.48871	0.38889	3.32228
0.78333	2.4991	0.39028	3.31979
0.78611	2.48561	0.39167	3.36882
0.78889	2.49885	0.39306	3.33102
0.79167	2.47918	0.39444	3.31432
0.79444	2.49967	0.39583	3.32928
0.79722	2.47584	0.39722	3.34406
0.8	2.48848	0.39861	3.33048
0.80278	2.4767	0.4	3.301
0.80556	2.48676	0.40139	3.30891
0.80833	2.50873	0.40278	3.33687
0.81111	2.49391	0.40417	3.30916
0.81389	2.48828	0.40556	3.31868
0.81667	2.45657	0.40694	3.31685
0.81944	2.48146	0.40833	3.33995
0.82222	2.48734	0.40972	3.32725
0.825	2.48846	0.41111	3.32048
0.82778	2.49461	0.4125	3.33332
0.83056	2.50423	0.41389	3.34566
0.83333	2.51138	0.41528	3.28778
0.83611	2.4893	0.41667	3.30954
0.83889	2.5114	0.41806	3.33836
0.84167	2.49648	0.41944	3.31168
0.84444	2.5101	0.42083	3.30181
0.84722	2.49115	0.42222	3.33809
0.85	2.4874	0.42361	3.31289
0.85278	2.51461	0.425	3.3179
0.85556	2.50109	0.42639	3.31161
0.85833	2.49016	0.42778	3.33326
0.86111	2.45904	0.42917	3.31497
0.86389	2.50155	0.43056	3.31527
0.86667	2.46396	0.43194	3.32419
0.86944	2.49076	0.43333	3.32078
0.87222	2.47738	0.43472	3.30032
0.875	2.51315	0.43611	3.30315
0.87778	2.4758	0.4375	3.33915
0.88056	2.50846	0.43889	3.31725
0.88333	2.48498	0.44028	3.31271
0.88611	2.5266	0.44167	3.34577
0.88889	2.49617	0.44306	3.34432
0.89167	2.49505	0.44444	3.32139
0.89444	2.50096	0.44583	3.30259
0.89722	2.4987	0.44722	3.31015
0.9	2.48042	0.44861	3.32125
0.90278	2.48154	0.45	3.31769
0.90556	2.50305	0.45139	3.32815
0.90833	2.48887	0.45278	3.31366
0.91111	2.49764	0.45417	3.30855
0.91389	2.5293	0.45556	3.33247
0.91667	2.50581	0.45694	3.35017
0.91944	2.50737	0.45833	3.30839
0.92222	2.49137	0.45972	3.34665
0.925	2.50235	0.46111	3.31123
0.92778	2.46412	0.4625	3.32525
0.93056	2.51668	0.46389	3.31112
0.93333	2.49022	0.46528	3.30752
0.93611	2.51486	0.46667	3.3327
0.93889	2.48613	0.46806	3.32286
0.94167	2.51009	0.46944	3.35447
0.94444	2.48053	0.47083	3.35769
0.94722	2.48927	0.47222	3.33898
0.95	2.52304	0.47361	3.30903
0.95278	2.52873	0.475	3.32364
0.95556	2.49561	0.47639	3.33267
0.95833	2.49661	0.47778	3.33066
0.96111	2.51806	0.47917	3.3012
0.96389	2.50651	0.48056	3.28997
0.96667	2.48062	0.48194	3.30739
0.96944	2.53373	0.48333	3.32225
0.97222	2.50774	0.48472	3.29346
0.975	2.50641	0.48611	3.31622
0.97778	2.50221	0.4875	3.33829
0.98056	2.4881	0.48889	3.32369
0.98333	2.49124	0.49028	3.3063
0.98611	2.54182	0.49167	3.31722
0.98889	2.48945	0.49306	3.35567
0.99167	2.49272	0.49444	3.30298
0.99444	2.5052	0.49583	3.30485
0.99722	2.51353	0.49722	3.33235
1	2.49003	0.49861	3.31733
1.00278	2.47074	0.5	3.34244
1.00556	2.50375	0.50139	3.3503
1.00833	2.48261	0.50278	3.30193
1.01111	2.4876	0.50417	3.32303
1.01389	2.49037	0.50556	3.33692
1.01667	2.50879	0.50694	3.31228
1.01944	2.48389	0.50833	3.32241
1.02222	2.49606	0.50972	3.31116
1.025	2.49648	0.51111	3.2908
1.02778	2.49901	0.5125	3.33059
1.03056	2.4842	0.51389	3.32875
1.03333	2.52128	0.51528	3.32115
1.03611	2.48447	0.51667	3.31477
1.03889	2.52268	0.51806	3.34706
1.04167	2.49887	0.51944	3.33436
1.04444	2.5043	0.52083	3.31844
1.04722	2.5205	0.52222	3.30611
1.05	2.47974	0.52361	3.29962
1.05278	2.50125	0.525	3.33427
1.05556	2.51182	0.52639	3.33292
1.05833	2.51506	0.52778	3.31444
1.06111	2.4947	0.52917	3.29416
1.06389	2.50212	0.53056	3.35551
1.06667	2.51139	0.53194	3.34002
1.06944	2.4927	0.53333	3.33216
1.07222	2.50117	0.53472	3.33521
1.075	2.48949	0.53611	3.31506
1.07778	2.50055	0.5375	3.33226
1.08056	2.51348	0.53889	3.31293
1.08333	2.50112	0.54028	3.30269
1.08611	2.50515	0.54167	3.31184
1.08889	2.49619	0.54306	3.33686
1.09167	2.50306	0.54444	3.30972
1.09444	2.48918	0.54583	3.31652
1.09722	2.50965	0.54722	3.30748
1.1	2.51165	0.54861	3.3203
1.10278	2.49377	0.55	3.34263
1.10556	2.50302	0.55139	3.3338
1.10833	2.50345	0.55278	3.3339
1.11111	2.52656	0.55417	3.31007
1.11389	2.48134	0.55556	3.32239
1.11667	2.50421	0.55694	3.31835
1.11944	2.51815	0.55833	3.31888
1.12222	2.48645	0.55972	3.31522
1.125	2.49554	0.56111	3.31689
1.12778	2.49969	0.5625	3.32703
1.13056	2.48627	0.56389	3.33747
1.13333	2.51734	0.56528	3.32237
1.13611	2.52834	0.56667	3.32729
1.13889	2.4935	0.56806	3.30355
1.14167	2.50308	0.56944	3.31927
1.14444	2.51308	0.57083	3.32307
1.14722	2.49101	0.57222	3.33191
1.15	2.5148	0.57361	3.32566
1.15278	2.51452	0.575	3.30722
1.15556	2.54395	0.57639	3.32932
1.15833	2.49451	0.57778	3.3377
1.16111	2.48484	0.57917	3.29855
1.16389	2.49773	0.58056	3.32211
1.16667	2.52392	0.58194	3.32558
1.16944	2.49007	0.58333	3.29969
1.17222	2.48989	0.58472	3.34787
1.175	2.49245	0.58611	3.32451
1.17778	2.51838	0.5875	3.33286
1.18056	2.49862	0.58889	3.31309
1.18333	2.51131	0.59028	3.31107
1.18611	2.48684	0.59167	3.32126
1.18889	2.50243	0.59306	3.32601
1.19167	2.49105	0.59444	3.32386
1.19444	2.51983	0.59583	3.3307
1.19722	2.5224	0.59722	3.32512
1.2	2.47572	0.59861	3.33234
1.20278	2.48372	0.6	3.33146
1.20556	2.50697	0.60139	3.29344
1.20833	2.5006	0.60278	3.34001
1.21111	2.52299	0.60417	3.30476
1.21389	2.50632	0.60556	3.32455
1.21667	2.51052	0.60694	3.3194
1.21944	2.4944	0.60833	3.31698
1.22222	2.54049	0.60972	3.3101
1.225	2.49019	0.61111	3.31195
1.22778	2.51537	0.6125	3.29789
1.23056	2.4827	0.61389	3.30461
1.23333	2.52041	0.61528	3.3213
1.23611	2.52653	0.61667	3.30649
1.23889	2.51284	0.61806	3.34311
1.24167	2.50041	0.61944	3.3092
1.24444	2.50312	0.62083	3.31135
1.24722	2.49315	0.62222	3.32231
1.25	2.51776	0.62361	3.30381
1.25278	2.53148	0.625	3.34697
1.25556	2.53574	0.62639	3.3344
1.25833	2.50419	0.62778	3.30754
1.26111	2.49726	0.62917	3.33507
1.26389	2.49723	0.63056	3.32217
1.26667	2.49668	0.63194	3.31985
1.26944	2.50079	0.63333	3.32472
1.27222	2.4977	0.63472	3.30417
1.275	2.5102	0.63611	3.32141
1.27778	2.52621	0.6375	3.31492
1.28056	2.51548	0.63889	3.28777
1.28333	2.50999	0.64028	3.3068
1.28611	2.50912	0.64167	3.31751
1.28889	2.52853	0.64306	3.30894
1.29167	2.51139	0.64444	3.30252
1.29444	2.49723	0.64583	3.30131
1.29722	2.50733	0.64722	3.3357
1.3	2.49272	0.64861	3.34119
1.30278	2.50239	0.65	3.31434
1.30556	2.51993	0.65139	3.32413
1.30833	2.51966	0.65278	3.29689
1.31111	2.51424	0.65417	3.32282
1.31389	2.48146	0.65556	3.30921
1.31667	2.50889	0.65694	3.32254
1.31944	2.49455	0.65833	3.30584
1.32222	2.52219	0.65972	3.28861
1.325	2.52323	0.66111	3.32179
1.32778	2.54626	0.6625	3.31011
1.33056	2.51963	0.66389	3.33592
1.33333	2.49296	0.66528	3.33603
1.33611	2.52875	0.66667	3.30619
1.33889	2.49172	0.66806	3.31003
1.34167	2.51107	0.66944	3.30046
1.34444	2.51371	0.67083	3.30055
1.34722	2.51643	0.67222	3.30557
1.35	2.52661	0.67361	3.33955
1.35278	2.49891	0.675	3.31016
1.35556	2.51802	0.67639	3.2997
1.35833	2.49075	0.67778	3.30346
1.36111	2.54025	0.67917	3.31312
1.36389	2.50272	0.68056	3.30782
1.36667	2.52	0.68194	3.31924
1.36944	2.49948	0.68333	3.31902
1.37222	2.52341	0.68472	3.30134
1.375	2.5098	0.68611	3.32114
1.37778	2.52145	0.6875	3.30817
1.38056	2.51017	0.68889	3.30651
1.38333	2.49079	0.69028	3.33849
1.38611	2.48223	0.69167	3.31199
1.38889	2.51784	0.69306	3.31694
1.39167	2.50136	0.69444	3.301
1.39444	2.5192	0.69583	3.3122
1.39722	2.51191	0.69722	3.29562
1.4	2.53782	0.69861	3.31434
1.40278	2.50653	0.7	3.31787
1.40556	2.50644	0.70139	3.32735
1.40833	2.50041	0.70278	3.30576
1.41111	2.48953	0.70417	3.36084
1.41389	2.5022	0.70556	3.31504
1.41667	2.51108	0.70694	3.32612
1.41944	2.52673	0.70833	3.29544
1.42222	2.50451	0.70972	3.32561
1.425	2.54231	0.71111	3.30822
1.42778	2.49075	0.7125	3.30657
1.43056	2.52984	0.71389	3.29638
1.43333	2.50924	0.71528	3.31597
1.43611	2.50677	0.71667	3.32169
1.43889	2.51378	0.71806	3.30242
1.44167	2.51877	0.71944	3.33141
1.44444	2.50429	0.72083	3.31548
1.44722	2.50325	0.72222	3.31225
1.45	2.51629	0.72361	3.29674
1.45278	2.50253	0.725	3.31519
1.45556	2.50353	0.72639	3.29141
1.45833	2.50806	0.72778	3.31187
1.46111	2.51372	0.72917	3.29137
1.46389	2.50914	0.73056	3.28279
1.46667	2.51153	0.73194	3.33773
1.46944	2.51854	0.73333	3.31294
1.47222	2.49719	0.73472	3.32728
1.475	2.51916	0.73611	3.28107
1.47778	2.51359	0.7375	3.29455
1.48056	2.50984	0.73889	3.3228
1.48333	2.47471	0.74028	3.29916
1.48611	2.52363	0.74167	3.28735
1.48889	2.52397	0.74306	3.29174
1.49167	2.50485	0.74444	3.30534
1.49444	2.50885	0.74583	3.34158
1.49722	2.47785	0.74722	3.29731
1.5	2.53081	0.74861	3.2819
1.50278	2.49151	0.75	3.3033
1.50556	2.54157	0.75139	3.31076
1.50833	2.51878	0.75278	3.29016
1.51111	2.51896	0.75417	3.294
1.51389	2.51955	0.75556	3.32424
1.51667	2.51209	0.75694	3.30928
1.51944	2.5133	0.75833	3.30749
1.52222	2.49507	0.75972	3.32235
1.525	2.50361	0.76111	3.28981
1.52778	2.50114	0.7625	3.30381
1.53056	2.5509	0.76389	3.30534
1.53333	2.51415	0.76528	3.33657
1.53611	2.53277	0.76667	3.29614
1.53889	2.52491	0.76806	3.34821
1.54167	2.52998	0.76944	3.34523
1.54444	2.5303	0.77083	3.28856
1.54722	2.50039	0.77222	3.3054
1.55	2.54616	0.77361	3.30488
1.55278	2.53427	0.775	3.3097
1.55556	2.48722	0.77639	3.29538
1.55833	2.51546	0.77778	3.31668
1.56111	2.51523	0.77917	3.30099
1.56389	2.50372	0.78056	3.30019
1.56667	2.51552	0.78194	3.29429
1.56944	2.53162	0.78333	3.31678
1.57222	2.50616	0.78472	3.29178
1.575	2.51931	0.78611	3.30184
1.57778	2.53177	0.7875	3.31348
1.58056	2.52254	0.78889	3.33925
1.58333	2.49899	0.79028	3.26214
1.58611	2.51561	0.79167	3.30603
1.58889	2.53214	0.79306	3.2825
1.59167	2.5202	0.79444	3.30248
1.59444	2.52114	0.79583	3.29874
1.59722	2.49414	0.79722	3.32208
1.6	2.507	0.79861	3.31294
1.60278	2.49886	0.8	3.30739
1.60556	2.54422	0.80139	3.30076
1.60833	2.53871	0.80278	3.29652
1.61111	2.53393	0.80417	3.34508
1.61389	2.50402	0.80556	3.33407
1.61667	2.50699	0.80694	3.31193
1.61944	2.51904	0.80833	3.31839
1.62222	2.52909	0.80972	3.31793
1.625	2.53139	0.81111	3.3309
1.62778	2.48216	0.8125	3.29118
1.63056	2.52788	0.81389	3.31108
1.63333	2.53192	0.81528	3.30046
1.63611	2.52979	0.81667	3.31284
1.63889	2.49657	0.81806	3.28655
1.64167	2.50843	0.81944	3.30799
1.64444	2.52374	0.82083	3.29594
1.64722	2.49974	0.82222	3.30994
1.65	2.51838	0.82361	3.29733
1.65278	2.50326	0.825	3.2982
1.65556	2.52778	0.82639	3.29939
1.65833	2.50425	0.82778	3.31324
1.66111	2.49397	0.82917	3.29704
1.66389	2.52366	0.83056	3.2856
1.66667	2.53127	0.83194	3.3084
1.66944	2.53804	0.83333	3.2921
1.67222	2.52798	0.83472	3.30966
1.675	2.50505	0.83611	3.36369
1.67778	2.53745	0.8375	3.31422
1.68056	2.51474	0.83889	3.33369
1.68333	2.52382	0.84028	3.30602
1.68611	2.52035	0.84167	3.31643
1.68889	2.51914	0.84306	3.29071
1.69167	2.50532	0.84444	3.29986
1.69444	2.49149	0.84583	3.30471
1.69722	2.53142	0.84722	3.31511
1.7	2.48921	0.84861	3.30791
1.70278	2.53227	0.85	3.30626
1.70556	2.49075	0.85139	3.32356
1.70833	2.48685	0.85278	3.28443
1.71111	2.50655	0.85417	3.29659
1.71389	2.49932	0.85556	3.29632
1.71667	2.52824	0.85694	3.30996
1.71944	2.5266	0.85833	3.30822
1.72222	2.51311	0.85972	3.29592
1.725	2.51011	0.86111	3.30539
1.72778	2.51732	0.8625	3.28638
1.73056	2.53515	0.86389	3.32849
1.73333	2.5073	0.86528	3.31164
1.73611	2.49552	0.86667	3.29743
1.73889	2.50448	0.86806	3.31681
1.74167	2.51702	0.86944	3.3095
1.74444	2.536	0.87083	3.29508
1.74722	2.48484	0.87222	3.31159
1.75	2.5086	0.87361	3.30753
1.75278	2.51516	0.875	3.32208
1.75556	2.51479	0.87639	3.3169
1.75833	2.52174	0.87778	3.31738
1.76111	2.53482	0.87917	3.30909
1.76389	2.53628	0.88056	3.34459
1.76667	2.50394	0.88194	3.29797
1.76944	2.5228	0.88333	3.31009
1.77222	2.53252	0.88472	3.30271
1.775	2.53157	0.88611	3.30534
1.77778	2.53814	0.8875	3.3187
1.78056	2.51063	0.88889	3.29139
1.78333	2.5317	0.89028	3.31227
1.78611	2.50307	0.89167	3.30289
1.78889	2.53385	0.89306	3.30051
1.79167	2.50003	0.89444	3.30306
1.79444	2.512	0.89583	3.2969
1.79722	2.51264	0.89722	3.33462
1.8	2.52604	0.89861	3.28721
1.80278	2.51022	0.9	3.29499
1.80556	2.51863	0.90139	3.27679
1.80833	2.52232	0.90278	3.30074
1.81111	2.52444	0.90417	3.27399
1.81389	2.54966	0.90556	3.30092
1.81667	2.52253	0.90694	3.30952
1.81944	2.51251	0.90833	3.28744
1.82222	2.51074	0.90972	3.31872
1.825	2.52754	0.91111	3.30109
1.82778	2.51671	0.9125	3.30672
1.83056	2.54605	0.91389	3.29031
1.83333	2.52255	0.91528	3.29085
1.83611	2.53122	0.91667	3.3039
1.83889	2.52733	0.91806	3.30395
1.84167	2.51522	0.91944	3.31147
1.84444	2.5207	0.92083	3.28756
1.84722	2.53285	0.92222	3.34534
1.85	2.51542	0.92361	3.27049
1.85278	2.51729	0.925	3.30588
1.85556	2.514	0.92639	3.28284
1.85833	2.5231	0.92778	3.3183
1.86111	2.52861	0.92917	3.30478
1.86389	2.51988	0.93056	3.33877
1.86667	2.52636	0.93194	3.34622
1.86944	2.52259	0.93333	3.28925
1.87222	2.51678	0.93472	3.3032
1.875	2.53019	0.93611	3.29025
1.87778	2.51287	0.9375	3.30875
1.88056	2.50926	0.93889	3.29545
1.88333	2.51713	0.94028	3.31622
1.88611	2.52038	0.94167	3.30697
1.88889	2.5077	0.94306	3.3238
1.89167	2.53434	0.94444	3.31744
1.89444	2.50979	0.94583	3.32249
1.89722	2.48424	0.94722	3.32001
1.9	2.49639	0.94861	3.28408
1.90278	2.51902	0.95	3.31867
1.90556	2.52686	0.95139	3.28396
1.90833	2.50308	0.95278	3.28991
1.91111	2.51581	0.95417	3.2961
1.91389	2.52973	0.95556	3.29818
1.91667	2.51488	0.95694	3.29432
1.91944	2.53846	0.95833	3.30987
1.92222	2.49684	0.95972	3.29866
1.925	2.51929	0.96111	3.29409
1.92778	2.52223	0.9625	3.30652
1.93056	2.52445	0.96389	3.29065
1.93333	2.50948	0.96528	3.29833
1.93611	2.51111	0.96667	3.30816
1.93889	2.52213	0.96806	3.32006
1.94167	2.52447	0.96944	3.30205
1.94444	2.52617	0.97083	3.31832
1.94722	2.52056	0.97222	3.30818
1.95	2.54072	0.97361	3.30908
1.95278	2.50161	0.975	3.30069
1.95556	2.4958	0.97639	3.3123
1.95833	2.51494	0.97778	3.32673
1.96111	2.52058	0.97917	3.29289
1.96389	2.53013	0.98056	3.29791
1.96667	2.50441	0.98194	3.29173
1.96944	2.53313	0.98333	3.31105
1.97222	2.50334	0.98472	3.29586
1.975	2.5355	0.98611	3.32691
1.97778	2.5409	0.9875	3.3234
1.98056	2.5005	0.98889	3.28814
1.98333	2.5182	0.99028	3.30812
1.98611	2.52224	0.99167	3.29657
1.98889	2.52968	0.99306	3.29682
1.99167	2.53215	0.99444	3.3143
1.99444	2.54441	0.99583	3.30168
1.99722	2.51242	0.99722	3.29401
2	2.51365	0.99861	3.31108
2.00278	2.51325	1	3.31163
2.00556	2.50859	1.00139	3.29604
2.00833	2.52425	1.00278	3.29156
2.01111	2.53171	1.00417	3.32583
2.01389	2.50925	1.00556	3.28495
2.01667	2.49588	1.00694	3.31388
2.01944	2.50795	1.00833	3.28785
2.02222	2.51815	1.00972	3.30295
2.025	2.50506	1.01111	3.30627
2.02778	2.53203	1.0125	3.31526
2.03056	2.50834	1.01389	3.28594
2.03333	2.511	1.01528	3.30135
2.03611	2.54549	1.01667	3.29739
2.03889	2.49887	1.01806	3.30782
2.04167	2.51651	1.01944	3.29918
2.04444	2.49753	1.02083	3.29731
2.04722	2.5096	1.02222	3.29533
2.05	2.51389	1.02361	3.30258
2.05278	2.50702	1.025	3.29635
2.05556	2.52234	1.02639	3.2854
2.05833	2.49624	1.02778	3.27685
2.06111	2.54361	1.02917	3.29539
2.06389	2.5237	1.03056	3.30446
2.06667	2.53481	1.03194	3.28799
2.06944	2.49336	1.03333	3.35499
2.07222	2.49059	1.03472	3.30024
2.075	2.51245	1.03611	3.29144
2.07778	2.50514	1.0375	3.30111
2.08056	2.52944	1.03889	3.29486
2.08333	2.50039	1.04028	3.33266
2.08611	2.53354	1.04167	3.30419
2.08889	2.53446	1.04306	3.29444
2.09167	2.52696	1.04444	3.30559
2.09444	2.54467	1.04583	3.31713
2.09722	2.50982	1.04722	3.29359
2.1	2.51294	1.04861	3.28615
2.10278	2.51422	1.05	3.29332
2.10556	2.51693	1.05139	3.30307
2.10833	2.51796	1.05278	3.29458
2.11111	2.50433	1.05417	3.32596
2.11389	2.51748	1.05556	3.30448
2.11667	2.5302	1.05694	3.29786
2.11944	2.53275	1.05833	3.31249
2.12222	2.51807	1.05972	3.29429
2.125	2.53341	1.06111	3.32073
2.12778	2.51437	1.0625	3.30262
2.13056	2.54699	1.06389	3.27582
2.13333	2.53585	1.06528	3.30114
2.13611	2.51589	1.06667	3.28665
2.13889	2.51395	1.06806	3.30829
2.14167	2.49273	1.06944	3.31793
2.14444	2.55953	1.07083	3.29569
2.14722	2.50254	1.07222	3.31633
2.15	2.54287	1.07361	3.31693
2.15278	2.53542	1.075	3.31537
2.15556	2.50816	1.07639	3.33495
2.15833	2.53836	1.07778	3.29305
2.16111	2.53172	1.07917	3.29921
2.16389	2.53234	1.08056	3.29989
2.16667	2.54168	1.08194	3.29946
2.16944	2.55159	1.08333	3.29343
2.17222	2.52366	1.08472	3.30832
2.175	2.51039	1.08611	3.31482
2.17778	2.54235	1.0875	3.30288
2.18056	2.55181	1.08889	3.29896
2.18333	2.51279	1.09028	3.30397
2.18611	2.5322	1.09167	3.31115
2.18889	2.50847	1.09306	3.30243
2.19167	2.51792	1.09444	3.2896
2.19444	2.54069	1.09583	3.3049
2.19722	2.56054	1.09722	3.30633
2.2	2.50856	1.09861	3.3153
2.20278	2.55527	1.1	3.31221
2.20556	2.54046	1.10139	3.3236
2.20833	2.54145	1.10278	3.30443
2.21111	2.56433	1.10417	3.30658
2.21389	2.51338	1.10556	3.28612
2.21667	2.52066	1.10694	3.27533
2.21944	2.52703	1.10833	3.29394
2.22222	2.54968	1.10972	3.29574
2.225	2.53171	1.11111	3.28899
2.22778	2.52924	1.1125	3.3034
2.23056	2.51025	1.11389	3.30662
2.23333	2.53573	1.11528	3.29453
2.23611	2.5198	1.11667	3.29081
2.23889	2.54297	1.11806	3.2908
2.24167	2.56697	1.11944	3.29646
2.24444	2.5564	1.12083	3.31789
2.24722	2.52363	1.12222	3.29747
2.25	2.50314	1.12361	3.29968
2.25278	2.53389	1.125	3.31989
2.25556	2.53724	1.12639	3.29928
2.25833	2.53484	1.12778	3.28195
2.26111	2.53802	1.12917	3.29476
2.26389	2.53362	1.13056	3.30849
2.26667	2.5265	1.13194	3.30861
2.26944	2.54007	1.13333	3.29295
2.27222	2.56007	1.13472	3.32284
2.275	2.52896	1.13611	3.31874
2.27778	2.51475	1.1375	3.29669
2.28056	2.55244	1.13889	3.29906
2.28333	2.55682	1.14028	3.29351
2.28611	2.51965	1.14167	3.29964
2.28889	2.53262	1.14306	3.29847
2.29167	2.52082	1.14444	3.3052
2.29444	2.53903	1.14583	3.32484
2.29722	2.5358	1.14722	3.30904
2.3	2.55295	1.14861	3.29364
2.30278	2.53302	1.15	3.295
2.30556	2.50547	1.15139	3.28701
2.30833	2.55278	1.15278	3.29178
2.31111	2.51251	1.15417	3.29703
2.31389	2.52802	1.15556	3.29022
2.31667	2.54663	1.15694	3.32716
2.31944	2.51967	1.15833	3.31916
2.32222	2.53021	1.15972	3.28873
2.325	2.50422	1.16111	3.30017
2.32778	2.53811	1.1625	3.3087
2.33056	2.53595	1.16389	3.29801
2.33333	2.51888	1.16528	3.30967
2.33611	2.51791	1.16667	3.2732
2.33889	2.51337	1.16806	3.34666
2.34167	2.50068	1.16944	3.28842
2.34444	2.51621	1.17083	3.30027
2.34722	2.56506	1.17222	3.28285
2.35	2.5131	1.17361	3.27694
2.35278	2.5354	1.175	3.30015
2.35556	2.51207	1.17639	3.29149
2.35833	2.53941	1.17778	3.28341
2.36111	2.53894	1.17917	3.29204
2.36389	2.54967	1.18056	3.29916
2.36667	2.5503	1.18194	3.30628
2.36944	2.53208	1.18333	3.30466
2.37222	2.53729	1.18472	3.30753
2.375	2.52345	1.18611	3.30718
2.37778	2.55945	1.1875	3.31733
2.38056	2.51353	1.18889	3.27059
2.38333	2.56029	1.19028	3.3021
2.38611	2.49503	1.19167	3.33236
2.38889	2.51778	1.19306	3.31271
2.39167	2.52266	1.19444	3.28141
2.39444	2.54501	1.19583	3.30305
2.39722	2.53253	1.19722	3.29291
2.4	2.53396	1.19861	3.28959
2.40278	2.54187	1.2	3.30064
2.40556	2.55396	1.20139	3.2938
2.40833	2.52491	1.20278	3.32292
2.41111	2.5236	1.20417	3.3067
2.41389	2.54112	1.20556	3.28911
2.41667	2.53241	1.20694	3.29867
2.41944	2.52952	1.20833	3.30079
2.42222	2.54075	1.20972	3.27938
2.425	2.5097	1.21111	3.28728
2.42778	2.53333	1.2125	3.32157
2.43056	2.54819	1.21389	3.27629
2.43333	2.53273	1.21528	3.31266
2.43611	2.54802	1.21667	3.31392
2.43889	2.53376	1.21806	3.31431
2.44167	2.54676	1.21944	3.29456
2.44444	2.53968	1.22083	3.27686
2.44722	2.52523	1.22222	3.29152
2.45	2.52042	1.22361	3.30738
2.45278	2.54657	1.225	3.29577
2.45556	2.53331	1.22639	3.29029
2.45833	2.52358	1.22778	3.2974
2.46111	2.5253	1.22917	3.30908
2.46389	2.52813	1.23056	3.31098
2.46667	2.51401	1.23194	3.30605
2.46944	2.51476	1.23333	3.32335
2.47222	2.54569	1.23472	3.32989
2.475	2.57436	1.23611	3.32034
2.47778	2.53364	1.2375	3.28912
2.48056	2.55978	1.23889	3.32162
2.48333	2.52163	1.24028	3.31215
2.48611	2.51874	1.24167	3.29801
2.48889	2.55687	1.24306	3.29532
2.49167	2.55529	1.24444	3.29783
2.49444	2.54618	1.24583	3.3082
2.49722	2.53247	1.24722	3.30621
2.5	2.52489	1.24861	3.28983
2.50278	2.52673	1.25	3.29688
2.50556	2.5317	1.25139	3.30711
2.50833	2.53154	1.25278	3.3085
2.51111	2.53152	1.25417	3.30174
2.51389	2.53711	1.25556	3.28238
2.51667	2.53122	1.25694	3.27577
2.51944	2.54176	1.25833	3.28089
2.52222	2.54442	1.25972	3.29407
2.525	2.51735	1.26111	3.2915
2.52778	2.52145	1.2625	3.29043
2.53056	2.52154	1.26389	3.28359
2.53333	2.55429	1.26528	3.27969
2.53611	2.50727	1.26667	3.2895
2.53889	2.52154	1.26806	3.32582
2.54167	2.51205	1.26944	3.31147
2.54444	2.5552	1.27083	3.28894
2.54722	2.51509	1.27222	3.30599
2.55	2.53573	1.27361	3.31912
2.55278	2.52056	1.275	3.31402
2.55556	2.52023	1.27639	3.30464
2.55833	2.54912	1.27778	3.3062
2.56111	2.54495	1.27917	3.29358
2.56389	2.52583	1.28056	3.30349
2.56667	2.512	1.28194	3.28886
2.56944	2.51153	1.28333	3.30379
2.57222	2.55623	1.28472	3.27174
2.575	2.53051	1.28611	3.28536
2.57778	2.55109	1.2875	3.27875
2.58056	2.54752	1.28889	3.2832
2.58333	2.52092	1.29028	3.30047
2.58611	2.52024	1.29167	3.29314
2.58889	2.54011	1.29306	3.29301
2.59167	2.52493	1.29444	3.3024
2.59444	2.53643	1.29583	3.30455
2.59722	2.53765	1.29722	3.29189
2.6	2.49696	1.29861	3.31926
2.60278	2.54117	1.3	3.30497
2.60556	2.5472	1.30139	3.30905
2.60833	2.56088	1.30278	3.28787
2.61111	2.51632	1.30417	3.31188
2.61389	2.52465	1.30556	3.30821
2.61667	2.54307	1.30694	3.31504
2.61944	2.56118	1.30833	3.311
2.62222	2.52603	1.30972	3.30047
2.625	2.51151	1.31111	3.3317
2.62778	2.55422	1.3125	3.30599
2.63056	2.535	1.31389	3.30633
2.63333	2.51555	1.31528	3.29922
2.63611	2.52307	1.31667	3.32315
2.63889	2.52439	1.31806	3.29494
2.64167	2.56572	1.31944	3.29288
2.64444	2.52966	1.32083	3.31948
2.64722	2.56106	1.32222	3.30007
2.65	2.53679	1.32361	3.2933
2.65278	2.51474	1.325	3.27006
2.65556	2.52933	1.32639	3.29771
2.65833	2.57422	1.32778	3.30208
2.66111	2.51457	1.32917	3.28988
2.66389	2.51418	1.33056	3.30229
2.66667	2.52425	1.33194	3.32073
2.66944	2.54199	1.33333	3.29446
2.67222	2.5567	1.33472	3.29597
2.675	2.53232	1.33611	3.30558
2.67778	2.54066	1.3375	3.30549
2.68056	2.54146	1.33889	3.29125
2.68333	2.50287	1.34028	3.30945
2.68611	2.53952	1.34167	3.30073
2.68889	2.51673	1.34306	3.28456
2.69167	2.53744	1.34444	3.28128
2.69444	2.52146	1.34583	3.28864
2.69722	2.53595	1.34722	3.28629
2.7	2.52413	1.34861	3.2753
2.70278	2.53292	1.35	3.28645
2.70556	2.53624	1.35139	3.27335
2.70833	2.51865	1.35278	3.27898
2.71111	2.51993	1.35417	3.30015
2.71389	2.55786	1.35556	3.31213
2.71667	2.53026	1.35694	3.29898
2.71944	2.50574	1.35833	3.3051
2.72222	2.54285	1.35972	3.28073
2.725	2.51186	1.36111	3.32002
2.72778	2.51807	1.3625	3.30765
2.73056	2.52958	1.36389	3.30338
2.73333	2.55642	1.36528	3.31351
2.73611	2.5429	1.36667	3.29374
2.73889	2.53526	1.36806	3.30038
2.74167	2.53694	1.36944	3.29338
2.74444	2.53708	1.37083	3.28988
2.74722	2.55077	1.37222	3.31606
2.75	2.50762	1.37361	3.28165
2.75278	2.53627	1.375	3.27902
2.75556	2.53357	1.37639	3.27806
2.75833	2.52743	1.37778	3.28123
2.76111	2.54742	1.37917	3.28502
2.76389	2.5256	1.38056	3.32805
2.76667	2.52763	1.38194	3.3117
2.76944	2.53711	1.38333	3.29674
2.77222	2.54223	1.38472	3.29213
2.775	2.53735	1.38611	3.29621
2.77778	2.55432	1.3875	3.29046
2.78056	2.57263	1.38889	3.30228
2.78333	2.55293	1.39028	3.29837
2.78611	2.56243	1.39167	3.3104
2.78889	2.56027	1.39306	3.27797
2.79167	2.5396	1.39444	3.31912
2.79444	2.52155	1.39583	3.29698
2.79722	2.54273	1.39722	3.30739
2.8	2.54922	1.39861	3.31551
2.80278	2.55451	1.4	3.28962
2.80556	2.53059	1.40139	3.3087
2.80833	2.54059	1.40278	3.2904
2.81111	2.53304	1.40417	3.3084
2.81389	2.54295	1.40556	3.2942
2.81667	2.53978	1.40694	3.28168
2.81944	2.55434	1.40833	3.29378
2.82222	2.52652	1.40972	3.33029
2.825	2.52707	1.41111	3.28264
2.82778	2.56084	1.4125	3.30033
2.83056	2.53998	1.41389	3.30287
2.83333	2.52676	1.41528	3.31753
2.83611	2.54622	1.41667	3.27524
2.83889	2.51453	1.41806	3.293
2.84167	2.56034	1.41944	3.29299
2.84444	2.51495	1.42083	3.30845
2.84722	2.56662	1.42222	3.31952
2.85	2.54416	1.42361	3.34946
2.85278	2.54565	1.425	3.30937
2.85556	2.51045	1.42639	3.30697
2.85833	2.53685	1.42778	3.29732
2.86111	2.52155	1.42917	3.31942
2.86389	2.5046	1.43056	3.29836
2.86667	2.53433	1.43194	3.32069
2.86944	2.532	1.43333	3.30536
2.87222	2.54139	1.43472	3.31446
2.875	2.55428	1.43611	3.30702
2.87778	2.54787	1.4375	3.32865
2.88056	2.51824	1.43889	3.29018
2.88333	2.54637	1.44028	3.30379
2.88611	2.54455	1.44167	3.32355
2.88889	2.52829	1.44306	3.31965
2.89167	2.54801	1.44444	3.3031
2.89444	2.53188	1.44583	3.26978
2.89722	2.56278	1.44722	3.28891
2.9	2.5376	1.44861	3.27425
2.90278	2.52803	1.45	3.30316
2.90556	2.54365	1.45139	3.27342
2.90833	2.52505	1.45278	3.29419
2.91111	2.53284	1.45417	3.3054
2.91389	2.53079	1.45556	3.291
2.91667	2.55444	1.45694	3.30537
2.91944	2.53897	1.45833	3.28738
2.92222	2.51588	1.45972	3.30225
2.925	2.51074	1.46111	3.31472
2.92778	2.53248	1.4625	3.27714
2.93056	2.54024	1.46389	3.27993
2.93333	2.5458	1.46528	3.28843
2.93611	2.52411	1.46667	3.29971
2.93889	2.52399	1.46806	3.29328
2.94167	2.54869	1.46944	3.31051
2.94444	2.58672	1.47083	3.32144
2.94722	2.54764	1.47222	3.30262
2.95	2.54314	1.47361	3.30758
2.95278	2.51671	1.475	3.31917
2.95556	2.54106	1.47639	3.29606
2.95833	2.54139	1.47778	3.29124
2.96111	2.53265	1.47917	3.29613
2.96389	2.54188	1.48056	3.27975
2.96667	2.52862	1.48194	3.30701
2.96944	2.56229	1.48333	3.27807
2.97222	2.55093	1.48472	3.31012
2.975	2.52468	1.48611	3.27555
2.97778	2.56351	1.4875	3.32069
2.98056	2.53676	1.48889	3.34319
2.98333	2.51451	1.49028	3.32619
2.98611	2.52852	1.49167	3.30569
2.98889	2.54982	1.49306	3.28849
2.99167	2.54267	1.49444	3.26512
2.99444	2.52207	1.49583	3.30257
2.99722	2.52926	1.49722	3.31039
3	2.54135	1.49861	3.30546
3.00278	2.58329	1.5	3.2956
3.00556	2.54524	1.50139	3.307
3.00833	2.54098	1.50278	3.28997
3.01111	2.53116	1.50417	3.30485
3.01389	2.52835	1.50556	3.30766
3.01667	2.55032	1.50694	3.29144
3.01944	2.54307	1.50833	3.29767
3.02222	2.54955	1.50972	3.33018
3.025	2.53229	1.51111	3.29968
3.02778	2.53141	1.5125	3.28938
3.03056	2.52245	1.51389	3.30877
3.03333	2.5487	1.51528	3.276
3.03611	2.53742	1.51667	3.30139
3.03889	2.52171	1.51806	3.32532
3.04167	2.54258	1.51944	3.2957
3.04444	2.54351	1.52083	3.30087
3.04722	2.53531	1.52222	3.31674
3.05	2.54581	1.52361	3.30497
3.05278	2.55021	1.525	3.31018
3.05556	2.53497	1.52639	3.30986
3.05833	2.53068	1.52778	3.28588
3.06111	2.55016	1.52917	3.27801
3.06389	2.54117	1.53056	3.3013
3.06667	2.53827	1.53194	3.31705
3.06944	2.54751	1.53333	3.29988
3.07222	2.55482	1.53472	3.292
3.075	2.55011	1.53611	3.31192
3.07778	2.55343	1.5375	3.30323
3.08056	2.53266	1.53889	3.30482
3.08333	2.55666	1.54028	3.31996
3.08611	2.53566	1.54167	3.29486
3.08889	2.52678	1.54306	3.2948
3.09167	2.55729	1.54444	3.29041
3.09444	2.55439	1.54583	3.30597
3.09722	2.55276	1.54722	3.29107
3.1	2.56801	1.54861	3.29791
3.10278	2.58507	1.55	3.2826
3.10556	2.58546	1.55139	3.32078
3.10833	2.54323	1.55278	3.27461
3.11111	2.54498	1.55417	3.31544
3.11389	2.53384	1.55556	3.28748
3.11667	2.53073	1.55694	3.32894
3.11944	2.52536	1.55833	3.29563
3.12222	2.54	1.55972	3.31723
3.125	2.53248	1.56111	3.29352
3.12778	2.5532	1.5625	3.28727
3.13056	2.52589	1.56389	3.29386
3.13333	2.55968	1.56528	3.29147
3.13611	2.54352	1.56667	3.31121
3.13889	2.53894	1.56806	3.3012
3.14167	2.54959	1.56944	3.28704
3.14444	2.53118	1.57083	3.3129
3.14722	2.54028	1.57222	3.29443
3.15	2.5512	1.57361	3.28403
3.15278	2.5685	1.575	3.28304
3.15556	2.5328	1.57639	3.30929
3.15833	2.56555	1.57778	3.30542
3.16111	2.54505	1.57917	3.32636
3.16389	2.54234	1.58056	3.28076
3.16667	2.54479	1.58194	3.28928
3.16944	2.52849	1.58333	3.30129
3.17222	2.5586	1.58472	3.30556
3.175	2.5673	1.58611	3.32394
3.17778	2.54864	1.5875	3.32391
3.18056	2.54516	1.58889	3.28171
3.18333	2.52737	1.59028	3.34131
3.18611	2.5456	1.59167	3.2911
3.18889	2.54641	1.59306	3.31244
3.19167	2.55531	1.59444	3.33486
3.19444	2.55327	1.59583	3.30396
3.19722	2.52362	1.59722	3.31706
3.2	2.5383	1.59861	3.30982
3.20278	2.55609	1.6	3.323
3.20556	2.53389	1.60139	3.30049
3.20833	2.54581	1.60278	3.30232
3.21111	2.55427	1.60417	3.28371
3.21389	2.56331	1.60556	3.30315
3.21667	2.56958	1.60694	3.29328
3.21944	2.56624	1.60833	3.30652
3.22222	2.53501	1.60972	3.29385
3.225	2.53703	1.61111	3.28495
3.22778	2.5268	1.6125	3.2979
3.23056	2.53863	1.61389	3.29783
3.23333	2.54151	1.61528	3.29819
3.23611	2.5141	1.61667	3.28433
3.23889	2.58399	1.61806	3.31491
3.24167	2.53788	1.61944	3.32824
3.24444	2.53414	1.62083	3.27969
3.24722	2.52803	1.62222	3.30365
3.25	2.54855	1.62361	3.30162
3.25278	2.56572	1.625	3.30224
3.25556	2.54673	1.62639	3.29245
3.25833	2.51759	1.62778	3.30412
3.26111	2.54029	1.62917	3.30179
3.26389	2.55829	1.63056	3.3384
3.26667	2.55215	1.63194	3.28273
3.26944	2.55017	1.63333	3.31549
3.27222	2.55851	1.63472	3.27583
3.275	2.55104	1.63611	3.31906
3.27778	2.52338	1.6375	3.29295
3.28056	2.53	1.63889	3.30333
3.28333	2.56228	1.64028	3.29317
3.28611	2.52834	1.64167	3.30082
3.28889	2.54491	1.64306	3.29655
3.29167	2.52576	1.64444	3.31398
3.29444	2.54322	1.64583	3.28618
3.29722	2.52675	1.64722	3.30252
3.3	2.5413	1.64861	3.30527
3.30278	2.54844	1.65	3.30426
3.30556	2.54822	1.65139	3.29262
3.30833	2.53101	1.65278	3.2933
3.31111	2.54414	1.65417	3.31154
3.31389	2.5337	1.65556	3.30991
3.31667	2.51954	1.65694	3.27395
3.31944	2.57464	1.65833	3.30663
3.32222	2.56564	1.65972	3.33712
3.325	2.56127	1.66111	3.27759
3.32778	2.5468	1.6625	3.30209
3.33056	2.52063	1.66389	3.27874
3.33333	2.55711	1.66528	3.33036
3.33611	2.54167	1.66667	3.32007
3.33889	2.56465	1.66806	3.29788
3.34167	2.53234	1.66944	3.29119
3.34444	2.52644	1.67083	3.28488
3.34722	2.53809	1.67222	3.29337
3.35	2.53742	1.67361	3.29755
3.35278	2.53957	1.675	3.30094
3.35556	2.51712	1.67639	3.29791
3.35833	2.52675	1.67778	3.30382
3.36111	2.54796	1.67917	3.29726
3.36389	2.53695	1.68056	3.30441
3.36667	2.53469	1.68194	3.29779
3.36944	2.53662	1.68333	3.2948
3.37222	2.57214	1.68472	3.31178
3.375	2.54634	1.68611	3.30032
3.37778	2.53092	1.6875	3.30406
3.38056	2.57829	1.68889	3.31109
3.38333	2.57657	1.69028	3.27907
3.38611	2.53695	1.69167	3.28537
3.38889	2.54564	1.69306	3.28873
3.39167	2.54072	1.69444	3.29577
3.39444	2.55672	1.69583	3.31506
3.39722	2.55396	1.69722	3.29777
3.4	2.54237	1.69861	3.28893
3.40278	2.5492	1.7	3.31363
3.40556	2.54233	1.70139	3.30064
3.40833	2.54721	1.70278	3.28889
3.41111	2.55786	1.70417	3.297
3.41389	2.54855	1.70556	3.29307
3.41667	2.5557	1.70694	3.28874
3.41944	2.58112	1.70833	3.30031
3.42222	2.54879	1.70972	3.32068
3.425	2.57444	1.71111	3.31305
3.42778	2.58595	1.7125	3.30251
3.43056	2.55235	1.71389	3.32901
3.43333	2.54997	1.71528	3.30111
3.43611	2.54967	1.71667	3.27973
3.43889	2.53113	1.71806	3.29846
3.44167	2.53862	1.71944	3.2909
3.44444	2.56639	1.72083	3.29913
3.44722	2.55004	1.72222	3.28447
3.45	2.55514	1.72361	3.31539
3.45278	2.54396	1.725	3.29587
3.45556	2.53296	1.72639	3.29442
3.45833	2.52094	1.72778	3.30046
3.46111	2.53847	1.72917	3.30622
3.46389	2.5352	1.73056	3.30116
3.46667	2.55864	1.73194	3.31114
3.46944	2.52951	1.73333	3.28911
3.47222	2.5516	1.73472	3.28899
3.475	2.53794	1.73611	3.32986
3.47778	2.56494	1.7375	3.30936
3.48056	2.53984	1.73889	3.32008
3.48333	2.55832	1.74028	3.27289
3.48611	2.55674	1.74167	3.32486
3.48889	2.53214	1.74306	3.28214
3.49167	2.55135	1.74444	3.28968
3.49444	2.5623	1.74583	3.31161
3.49722	2.54562	1.74722	3.30352
3.5	2.53099	1.74861	3.29348
3.50278	2.521	1.75	3.28011
3.50556	2.54429	1.75139	3.28788
3.50833	2.54362	1.75278	3.27599
3.51111	2.55142	1.75417	3.28914
3.51389	2.52426	1.75556	3.27894
3.51667	2.57743	1.75694	3.29384
3.51944	2.53634	1.75833	3.29237
3.52222	2.54468	1.75972	3.30453
3.525	2.56365	1.76111	3.26504
3.52778	2.56236	1.7625	3.29694
3.53056	2.52554	1.76389	3.28301
3.53333	2.54436	1.76528	3.29858
3.53611	2.54973	1.76667	3.3105
3.53889	2.56132	1.76806	3.29654
3.54167	2.57958	1.76944	3.3242
3.54444	2.55511	1.77083	3.30255
3.54722	2.561	1.77222	3.31848
3.55	2.54329	1.77361	3.28631
3.55278	2.56013	1.775	3.33226
3.55556	2.54664	1.77639	3.3223
3.55833	2.52962	1.77778	3.29294
3.56111	2.53693	1.77917	3.29553
3.56389	2.53801	1.78056	3.29597
3.56667	2.5513	1.78194	3.30291
3.56944	2.54383	1.78333	3.29807
3.57222	2.5458	1.78472	3.30832
3.575	2.5478	1.78611	3.29338
3.57778	2.56976	1.7875	3.30187
3.58056	2.53452	1.78889	3.29808
3.58333	2.55697	1.79028	3.29657
3.58611	2.55719	1.79167	3.31236
3.58889	2.52919	1.79306	3.28792
3.59167	2.53426	1.79444	3.29633
3.59444	2.55838	1.79583	3.32089
3.59722	2.54015	1.79722	3.2856
3.6	2.55649	1.79861	3.30534
3.60278	2.57106	1.8	3.26195
3.60556	2.55131	1.80139	3.31729
3.60833	2.54776	1.80278	3.29954
3.61111	2.57701	1.80417	3.36445
3.61389	2.53484	1.80556	3.31173
3.61667	2.55142	1.80694	3.29221
3.61944	2.57186	1.80833	3.29666
3.62222	2.56322	1.80972	3.3032
3.625	2.56581	1.81111	3.27803
3.62778	2.55764	1.8125	3.29811
3.63056	2.55376	1.81389	3.32524
3.63333	2.54383	1.81528	3.31691
3.63611	2.5431	1.81667	3.29886
3.63889	2.55343	1.81806	3.30375
3.64167	2.58205	1.81944	3.27839
3.64444	2.56458	1.82083	3.30996
3.64722	2.55308	1.82222	3.3003
3.65	2.55161	1.82361	3.30313
3.65278	2.55088	1.825	3.28536
3.65556	2.53482	1.82639	3.31073
3.65833	2.53756	1.82778	3.31544
3.66111	2.56043	1.82917	3.29187
3.66389	2.54519	1.83056	3.29009
3.66667	2.53478	1.83194	3.29932
3.66944	2.52862	1.83333	3.29824
3.67222	2.56836	1.83472	3.29294
3.675	2.54165	1.83611	3.30204
3.67778	2.54452	1.8375	3.27984
3.68056	2.54613	1.83889	3.28594
3.68333	2.53944	1.84028	3.28771
3.68611	2.54446	1.84167	3.29913
3.68889	2.541	1.84306	3.30458
3.69167	2.54161	1.84444	3.31957
3.69444	2.57409	1.84583	3.31503
3.69722	2.55446	1.84722	3.28957
3.7	2.57954	1.84861	3.29231
3.70278	2.54051	1.85	3.3166
3.70556	2.53446	1.85139	3.2964
3.70833	2.54324	1.85278	3.32677
3.71111	2.54629	1.85417	3.30529
3.71389	2.54422	1.85556	3.28535
3.71667	2.51905	1.85694	3.29027
3.71944	2.56883	1.85833	3.28499
3.72222	2.56874	1.85972	3.29127
3.725	2.56851	1.86111	3.29107
3.72778	2.55565	1.8625	3.31508
3.73056	2.54004	1.86389	3.32748
3.73333	2.5643	1.86528	3.29336
3.73611	2.56378	1.86667	3.30393
3.73889	2.55799	1.86806	3.27853
3.74167	2.54344	1.86944	3.2925
3.74444	2.56364	1.87083	3.2828
3.74722	2.56366	1.87222	3.29545
3.75	2.55785	1.87361	3.32301
3.75278	2.58039	1.875	3.30624
3.75556	2.55566	1.87639	3.30145
3.75833	2.51559	1.87778	3.30037
3.76111	2.55146	1.87917	3.28072
3.76389	2.55034	1.88056	3.28735
3.76667	2.56628	1.88194	3.27276
3.76944	2.56217	1.88333	3.29164
3.77222	2.54725	1.88472	3.28354
3.775	2.56498	1.88611	3.28131
3.77778	2.54442	1.8875	3.28452
3.78056	2.55692	1.88889	3.33178
3.78333	2.56403	1.89028	3.29223
3.78611	2.55196	1.89167	3.31043
3.78889	2.55878	1.89306	3.28872
3.79167	2.58696	1.89444	3.30046
3.79444	2.55809	1.89583	3.28897
3.79722	2.53198	1.89722	3.3172
3.8	2.53065	1.89861	3.29894
3.80278	2.55833	1.9	3.27939
3.80556	2.57125	1.90139	3.30492
3.80833	2.54242	1.90278	3.28555
3.81111	2.53182	1.90417	3.31687
3.81389	2.56369	1.90556	3.29846
3.81667	2.54249	1.90694	3.28547
3.81944	2.53845	1.90833	3.27916
3.82222	2.56012	1.90972	3.3082
3.825	2.54605	1.91111	3.28704
3.82778	2.56747	1.9125	3.31474
3.83056	2.57375	1.91389	3.34109
3.83333	2.54774	1.91528	3.3119
3.83611	2.56376	1.91667	3.33772
3.83889	2.54586	1.91806	3.28868
3.84167	2.56128	1.91944	3.26885
3.84444	2.54432	1.92083	3.28653
3.84722	2.56591	1.92222	3.27926
3.85	2.55033	1.92361	3.29913
3.85278	2.57173	1.925	3.29365
3.85556	2.53556	1.92639	3.29835
3.85833	2.5564	1.92778	3.31135
3.86111	2.56269	1.92917	3.29212
3.86389	2.54502	1.93056	3.30255
3.86667	2.5654	1.93194	3.29171
3.86944	2.57222	1.93333	3.29242
3.87222	2.53934	1.93472	3.30966
3.875	2.56402	1.93611	3.30658
3.87778	2.56501	1.9375	3.29817
3.88056	2.5685	1.93889	3.28287
3.88333	2.56235	1.94028	3.2975
3.88611	2.54601	1.94167	3.31681
3.88889	2.52513	1.94306	3.32187
3.89167	2.55391	1.94444	3.28039
3.89444	2.55267	1.94583	3.33993
3.89722	2.57424	1.94722	3.3065
3.9	2.53722	1.94861	3.28639
3.90278	2.55387	1.95	3.28891
3.90556	2.58053	1.95139	3.28974
3.90833	2.56624	1.95278	3.29144
3.91111	2.54448	1.95417	3.29165
3.91389	2.57061	1.95556	3.33873
3.91667	2.56579	1.95694	3.28814
3.91944	2.56727	1.95833	3.30322
3.92222	2.53822	1.95972	3.29746
3.925	2.5672	1.96111	3.30348
3.92778	2.54566	1.9625	3.31642
3.93056	2.53681	1.96389	3.29782
3.93333	2.57801	1.96528	3.2931
3.93611	2.57677	1.96667	3.29078
3.93889	2.55588	1.96806	3.32831
3.94167	2.54992	1.96944	3.30114
3.94444	2.53299	1.97083	3.30379
3.94722	2.53946	1.97222	3.29953
3.95	2.55947	1.97361	3.29885
3.95278	2.56389	1.975	3.30075
3.95556	2.5491	1.97639	3.32183
3.95833	2.54923	1.97778	3.30517
3.96111	2.582	1.97917	3.29949
3.96389	2.58685	1.98056	3.29903
3.96667	2.55662	1.98194	3.30217
3.96944	2.56093	1.98333	3.29676
3.97222	2.57121	1.98472	3.29747
3.975	2.57933	1.98611	3.31355
3.97778	2.54689	1.9875	3.28245
3.98056	2.56061	1.98889	3.28547
3.98333	2.58076	1.99028	3.31811
3.98611	2.56959	1.99167	3.28737
3.98889	2.56528	1.99306	3.2951
3.99167	2.5478	1.99444	3.29379
3.99444	2.54219	1.99583	3.2799
3.99722	2.55589	1.99722	3.31084
4	2.5775	1.99861	3.31221
4.00278	2.56522	2	3.29053
4.00556	2.55466	2.00139	3.29776
4.00833	2.55588	2.00278	3.29003
4.01111	2.5543	2.00417	3.2981
4.01389	2.57255	2.00556	3.31572
4.01667	2.54247	2.00694	3.29737
4.01944	2.53975	2.00833	3.29227
4.02222	2.56063	2.00972	3.2975
4.025	2.59051	2.01111	3.30724
4.02778	2.55698	2.0125	3.29507
4.03056	2.54118	2.01389	3.29894
4.03333	2.58615	2.01528	3.29893
4.03611	2.54837	2.01667	3.32184
4.03889	2.55019	2.01806	3.32274
4.04167	2.53488	2.01944	3.30176
4.04444	2.56094	2.02083	3.28551
4.04722	2.54308	2.02222	3.27176
4.05	2.57199	2.02361	3.30737
4.05278	2.55169	2.025	3.28625
4.05556	2.55601	2.02639	3.31835
4.05833	2.55622	2.02778	3.28348
4.06111	2.54181	2.02917	3.28459
4.06389	2.56466	2.03056	3.27606
4.06667	2.56454	2.03194	3.30332
4.06944	2.57835	2.03333	3.28266
4.07222	2.56978	2.03472	3.31827
4.075	2.56108	2.03611	3.2836
4.07778	2.54675	2.0375	3.29928
4.08056	2.5577	2.03889	3.28678
4.08333	2.55167	2.04028	3.29298
4.08611	2.54036	2.04167	3.28169
4.08889	2.57659	2.04306	3.28884
4.09167	2.55641	2.04444	3.30857
4.09444	2.52853	2.04583	3.29347
4.09722	2.55586	2.04722	3.2975
4.1	2.58615	2.04861	3.30646
4.10278	2.54891	2.05	3.29037
4.10556	2.55705	2.05139	3.30431
4.10833	2.56999	2.05278	3.31254
4.11111	2.56129	2.05417	3.28512
4.11389	2.56713	2.05556	3.28201
4.11667	2.5418	2.05694	3.28871
4.11944	2.55212	2.05833	3.29161
4.12222	2.56112	2.05972	3.29019
4.125	2.55694	2.06111	3.30306
4.12778	2.53809	2.0625	3.29002
4.13056	2.54966	2.06389	3.28364
4.13333	2.541	2.06528	3.33516
4.13611	2.56602	2.06667	3.31191
4.13889	2.54984	2.06806	3.30216
4.14167	2.54268	2.06944	3.29553
4.14444	2.53673	2.07083	3.2847
4.14722	2.5656	2.07222	3.28856
4.15	2.55735	2.07361	3.29102
4.15278	2.55473	2.075	3.28979
4.15556	2.52814	2.07639	3.28235
4.15833	2.56032	2.07778	3.28342
4.16111	2.53658	2.07917	3.31302
4.16389	2.53731	2.08056	3.29961
4.16667	2.57455	2.08194	3.30734
4.16944	2.56086	2.08333	3.30086
4.17222	2.57002	2.08472	3.30322
4.175	2.5865	2.08611	3.32183
4.17778	2.55805	2.0875	3.30203
4.18056	2.54341	2.08889	3.283
4.18333	2.54919	2.09028	3.28679
4.18611	2.5538	2.09167	3.30416
4.18889	2.56475	2.09306	3.31945
4.19167	2.56604	2.09444	3.27925
4.19444	2.56748	2.09583	3.3204
4.19722	2.56204	2.09722	3.28391
4.2	2.57062	2.09861	3.28701
4.20278	2.56963	2.1	3.29568
4.20556	2.53565	2.10139	3.29656
4.20833	2.55842	2.10278	3.30264
4.21111	2.55432	2.10417	3.30932
4.21389	2.56502	2.10556	3.32845
4.21667	2.55788	2.10694	3.2877
4.21944	2.54741	2.10833	3.29083
4.22222	2.54882	2.10972	3.29956
4.225	2.54615	2.11111	3.30094
4.22778	2.5678	2.1125	3.30179
4.23056	2.53414	2.11389	3.29427
4.23333	2.53085	2.11528	3.30452
4.23611	2.55182	2.11667	3.31702
4.23889	2.56012	2.11806	3.29466
4.24167	2.54548	2.11944	3.30471
4.24444	2.59253	2.12083	3.30312
4.24722	2.56433	2.12222	3.30824
4.25	2.56715	2.12361	3.33731
4.25278	2.56493	2.125	3.31241
4.25556	2.56526	2.12639	3.2975
4.25833	2.54582	2.12778	3.27281
4.26111	2.55221	2.12917	3.28233
4.26389	2.58229	2.13056	3.27477
4.26667	2.5876	2.13194	3.27697
4.26944	2.54664	2.13333	3.30841
4.27222	2.54835	2.13472	3.31405
4.275	2.56937	2.13611	3.29988
4.27778	2.53943	2.1375	3.30183
4.28056	2.57996	2.13889	3.28059
4.28333	2.56227	2.14028	3.30451
4.28611	2.54921	2.14167	3.30785
4.28889	2.54562	2.14306	3.28853
4.29167	2.55469	2.14444	3.30251
4.29444	2.5613	2.14583	3.30396
4.29722	2.55935	2.14722	3.28675
4.3	2.576	2.14861	3.28443
4.30278	2.56467	2.15	3.29601
4.30556	2.55472	2.15139	3.27317
4.30833	2.54238	2.15278	3.27735
4.31111	2.56367	2.15417	3.28594
4.31389	2.56128	2.15556	3.31365
4.31667	2.55721	2.15694	3.29828
4.31944	2.56557	2.15833	3.29906
4.32222	2.54894	2.15972	3.31727
4.325	2.5302	2.16111	3.29235
4.32778	2.57802	2.1625	3.30668
4.33056	2.56381	2.16389	3.29437
4.33333	2.56516	2.16528	3.30853
4.33611	2.54828	2.16667	3.28529
4.33889	2.55758	2.16806	3.27468
4.34167	2.53897	2.16944	3.30503
4.34444	2.57573	2.17083	3.29616
4.34722	2.57033	2.17222	3.28122
4.35	2.564	2.17361	3.31587
4.35278	2.56464	2.175	3.30755
4.35556	2.57036	2.17639	3.28287
4.35833	2.54723	2.17778	3.29276
4.36111	2.55251	2.17917	3.30633
4.36389	2.58561	2.18056	3.30642
4.36667	2.5731	2.18194	3.311
4.36944	2.55014	2.18333	3.30924
4.37222	2.57025	2.18472	3.28176
4.375	2.5773	2.18611	3.28302
4.37778	2.56088	2.1875	3.28135
4.38056	2.58453	2.18889	3.30679
4.38333	2.55738	2.19028	3.30782
4.38611	2.58113	2.19167	3.29688
4.38889	2.57589	2.19306	3.3034
4.39167	2.57951	2.19444	3.28455
4.39444	2.54196	2.19583	3.29144
4.39722	2.58909	2.19722	3.30813
4.4	2.5767	2.19861	3.31647
4.40278	2.56399	2.2	3.32461
4.40556	2.58827	2.20139	3.2978
4.40833	2.54641	2.20278	3.27977
4.41111	2.57124	2.20417	3.29816
4.41389	2.57011	2.20556	3.31684
4.41667	2.56061	2.20694	3.28612
4.41944	2.55091	2.20833	3.31428
4.42222	2.54295	2.20972	3.30158
4.425	2.54802	2.21111	3.29836
4.42778	2.56758	2.2125	3.31043
4.43056	2.57126	2.21389	3.34787
4.43333	2.55157	2.21528	3.31514
4.43611	2.55584	2.21667	3.26921
4.43889	2.55085	2.21806	3.27952
4.44167	2.55398	2.21944	3.29113
4.44444	2.54119	2.22083	3.31447
4.44722	2.55687	2.22222	3.33261
4.45	2.57136	2.22361	3.28742
4.45278	2.56859	2.225	3.28642
4.45556	2.54966	2.22639	3.2983
4.45833	2.54975	2.22778	3.30266
4.46111	2.5902	2.22917	3.30489
4.46389	2.55435	2.23056	3.31138
4.46667	2.58077	2.23194	3.30138
4.46944	2.56157	2.23333	3.31127
4.47222	2.56386	2.23472	3.30273
4.475	2.56308	2.23611	3.30675
4.47778	2.55894	2.2375	3.30659
4.48056	2.58233	2.23889	3.28795
4.48333	2.56768	2.24028	3.28844
4.48611	2.56001	2.24167	3.3009
4.48889	2.58021	2.24306	3.28635
4.49167	2.56652	2.24444	3.29309
4.49444	2.58349	2.24583	3.29021
4.49722	2.59568	2.24722	3.29255
4.5	2.55185	2.24861	3.28681
4.50278	2.56385	2.25	3.2859
4.50556	2.56345	2.25139	3.2961
4.50833	2.57003	2.25278	3.28774
4.51111	2.55207	2.25417	3.29427
4.51389	2.55741	2.25556	3.30714
4.51667	2.55346	2.25694	3.2677
4.51944	2.57252	2.25833	3.29571
4.52222	2.56675	2.25972	3.29381
4.525	2.56396	2.26111	3.26818
4.52778	2.5698	2.2625	3.30669
4.53056	2.55801	2.26389	3.31192
4.53333	2.57264	2.26528	3.2659
4.53611	2.57654	2.26667	3.29527
4.53889	2.55372	2.26806	3.28027
4.54167	2.57686	2.26944	3.29347
4.54444	2.56396	2.27083	3.28942
4.54722	2.56471	2.27222	3.28917
4.55	2.56852	2.27361	3.32784
4.55278	2.57685	2.275	3.30869
4.55556	2.5602	2.27639	3.30675
4.55833	2.56245	2.27778	3.30414
4.56111	2.587	2.27917	3.27738
4.56389	2.57955	2.28056	3.30883
4.56667	2.53301	2.28194	3.30109
4.56944	2.56118	2.28333	3.32807
4.57222	2.55714	2.28472	3.30313
4.575	2.57279	2.28611	3.31532
4.57778	2.57257	2.2875	3.31123
4.58056	2.57832	2.28889	3.26759
4.58333	2.58277	2.29028	3.28197
4.58611	2.55523	2.29167	3.2833
4.58889	2.58154	2.29306	3.29688
4.59167	2.56818	2.29444	3.30885
4.59444	2.56613	2.29583	3.30245
4.59722	2.57128	2.29722	3.28383
4.6	2.56251	2.29861	3.28998
4.60278	2.59697	2.3	3.3159
4.60556	2.58265	2.30139	3.30009
4.60833	2.57447	2.30278	3.28871
4.61111	2.58092	2.30417	3.28657
4.61389	2.54145	2.30556	3.31202
4.61667	2.57489	2.30694	3.27857
4.61944	2.58501	2.30833	3.29235
4.62222	2.55005	2.30972	3.29045
4.625	2.52511	2.31111	3.31968
4.62778	2.56824	2.3125	3.2883
4.63056	2.55926	2.31389	3.29806
4.63333	2.57215	2.31528	3.28421
4.63611	2.5685	2.31667	3.3038
4.63889	2.56915	2.31806	3.27664
4.64167	2.55322	2.31944	3.27717
4.64444	2.57048	2.32083	3.29208
4.64722	2.56361	2.32222	3.31972
4.65	2.57081	2.32361	3.29513
4.65278	2.57128	2.325	3.29347
4.65556	2.55708	2.32639	3.28832
4.65833	2.56644	2.32778	3.29636
4.66111	2.5685	2.32917	3.32693
4.66389	2.55664	2.33056	3.28839
4.66667	2.60611	2.33194	3.28912
4.66944	2.5528	2.33333	3.30194
4.67222	2.57824	2.33472	3.34108
4.675	2.58491	2.33611	3.31892
4.67778	2.53189	2.3375	3.29793
4.68056	2.57666	2.33889	3.32156
4.68333	2.58456	2.34028	3.29731
4.68611	2.54926	2.34167	3.31066
4.68889	2.57879	2.34306	3.33644
4.69167	2.54927	2.34444	3.31419
4.69444	2.57411	2.34583	3.3003
4.69722	2.58978	2.34722	3.2831
4.7	2.58001	2.34861	3.28364
4.70278	2.54231	2.35	3.29038
4.70556	2.57184	2.35139	3.28882
4.70833	2.57201	2.35278	3.32741
4.71111	2.55612	2.35417	3.30688
4.71389	2.57932	2.35556	3.29798
4.71667	2.55103	2.35694	3.30625
4.71944	2.58273	2.35833	3.28885
4.72222	2.57601	2.35972	3.30448
4.725	2.55613	2.36111	3.27113
4.72778	2.5738	2.3625	3.29768
4.73056	2.57829	2.36389	3.29296
4.73333	2.59123	2.36528	3.3137
4.73611	2.55348	2.36667	3.32978
4.73889	2.58471	2.36806	3.29717
4.74167	2.56968	2.36944	3.27989
4.74444	2.55901	2.37083	3.28884
4.74722	2.58044	2.37222	3.27478
4.75	2.58384	2.37361	3.27198
4.75278	2.55743	2.375	3.2867
4.75556	2.54984	2.37639	3.28706
4.75833	2.57744	2.37778	3.30596
4.76111	2.55696	2.37917	3.31201
4.76389	2.56457	2.38056	3.31448
4.76667	2.56814	2.38194	3.30833
4.76944	2.55254	2.38333	3.28956
4.77222	2.57238	2.38472	3.28952
4.775	2.56534	2.38611	3.28568
4.77778	2.57759	2.3875	3.30548
4.78056	2.56898	2.38889	3.32193
4.78333	2.54108	2.39028	3.29168
4.78611	2.56994	2.39167	3.2905
4.78889	2.56981	2.39306	3.30649
4.79167	2.58622	2.39444	3.32711
4.79444	2.5719	2.39583	3.29529
4.79722	2.56084	2.39722	3.28285
4.8	2.55419	2.39861	3.29094
4.80278	2.54868	2.4	3.28116
4.80556	2.59103	2.40139	3.26646
4.80833	2.5699	2.40278	3.28178
4.81111	2.57526	2.40417	3.28462
4.81389	2.56803	2.40556	3.27653
4.81667	2.56397	2.40694	3.2942
4.81944	2.58428	2.40833	3.28549
4.82222	2.58405	2.40972	3.29121
4.825	2.55943	2.41111	3.30748
4.82778	2.62656	2.4125	3.30752
4.83056	2.56868	2.41389	3.28915
4.83333	2.56424	2.41528	3.32124
4.83611	2.56982	2.41667	3.30498
4.83889	2.56089	2.41806	3.30148
4.84167	2.56724	2.41944	3.29497
4.84444	2.55804	2.42083	3.29182
4.84722	2.57142	2.42222	3.32153
4.85	2.56656	2.42361	3.31175
4.85278	2.56433	2.425	3.29785
4.85556	2.56832	2.42639	3.3008
4.85833	2.56209	2.42778	3.3011
4.86111	2.57727	2.42917	3.29167
4.86389	2.55741	2.43056	3.29043
4.86667	2.55328	2.43194	3.29286
4.86944	2.58288	2.43333	3.28716
4.87222	2.55591	2.43472	3.27433
4.875	2.57432	2.43611	3.30456
4.87778	2.57115	2.4375	3.30584
4.88056	2.5555	2.43889	3.33773
4.88333	2.58126	2.44028	3.30336
4.88611	2.58433	2.44167	3.33416
4.88889	2.55154	2.44306	3.31148
4.89167	2.55112	2.44444	3.31752
4.89444	2.56891	2.44583	3.29862
4.89722	2.58276	2.44722	3.2869
4.9	2.60028	2.44861	3.28725
4.90278	2.5624	2.45	3.29604
4.90556	2.55855	2.45139	3.30104
4.90833	2.54605	2.45278	3.29315
4.91111	2.54917	2.45417	3.28673
4.91389	2.57793	2.45556	3.30491
4.91667	2.56645	2.45694	3.32507
4.91944	2.58609	2.45833	3.31323
4.92222	2.57137	2.45972	3.31535
4.925	2.56167	2.46111	3.34246
4.92778	2.58204	2.4625	3.32161
4.93056	2.58547	2.46389	3.28793
4.93333	2.59406	2.46528	3.28898
4.93611	2.57064	2.46667	3.27875
4.93889	2.57855	2.46806	3.30671
4.94167	2.56152	2.46944	3.28587
4.94444	2.59022	2.47083	3.29859
4.94722	2.5749	2.47222	3.30754
4.95	2.5663	2.47361	3.30277
4.95278	2.58284	2.475	3.27784
4.95556	2.59698	2.47639	3.29628
4.95833	2.55159	2.47778	3.30352
4.96111	2.56471	2.47917	3.28119
4.96389	2.56482	2.48056	3.29113
4.96667	2.61092	2.48194	3.28474
4.96944	2.58622	2.48333	3.29292
4.97222	2.54444	2.48472	3.2952
4.975	2.56737	2.48611	3.29624
4.97778	2.56794	2.4875	3.29926
4.98056	2.5975	2.48889	3.25152
4.98333	2.60194	2.49028	3.31037
4.98611	2.56573	2.49167	3.30516
4.98889	2.56871	2.49306	3.27791
4.99167	2.54428	2.49444	3.30644
4.99444	2.55665	2.49583	3.29472
4.99722	2.55285	2.49722	3.30705
5	2.57078	2.49861	3.28332
5.00278	2.56447	2.5	3.28948
5.00556	2.56597	2.50139	3.2732
5.00833	2.56986	2.50278	3.31383
5.01111	2.58259	2.50417	3.3033
5.01389	2.57131	2.50556	3.31866
5.01667	2.62341	2.50694	3.29366
5.01944	2.55314	2.50833	3.29279
5.02222	2.56895	2.50972	3.31698
5.025	2.58969	2.51111	3.31405
5.02778	2.55078	2.5125	3.27667
5.03056	2.56291	2.51389	3.27822
5.03333	2.55014	2.51528	3.30508
5.03611	2.56448	2.51667	3.30151
5.03889	2.59492	2.51806	3.29929
5.04167	2.57581	2.51944	3.298
5.04444	2.57547	2.52083	3.29284
5.04722	2.57513	2.52222	3.26918
5.05	2.58322	2.52361	3.33589
5.05278	2.58224	2.525	3.3216
5.05556	2.56953	2.52639	3.31817
5.05833	2.54876	2.52778	3.30365
5.06111	2.58184	2.52917	3.31278
5.06389	2.56637	2.53056	3.33294
5.06667	2.60531	2.53194	3.27409
5.06944	2.56709	2.53333	3.29566
5.07222	2.5843	2.53472	3.29865
5.075	2.59972	2.53611	3.32912
5.07778	2.57835	2.5375	3.30951
5.08056	2.57648	2.53889	3.3137
5.08333	2.58663	2.54028	3.31179
5.08611	2.57021	2.54167	3.33899
5.08889	2.59369	2.54306	3.29557
5.09167	2.56545	2.54444	3.30669
5.09444	2.56305	2.54583	3.31145
5.09722	2.5958	2.54722	3.27715
5.1	2.56089	2.54861	3.30604
5.10278	2.56618	2.55	3.30416
5.10556	2.56613	2.55139	3.30687
5.10833	2.57549	2.55278	3.3138
5.11111	2.59394	2.55417	3.29751
5.11389	2.54976	2.55556	3.3018
5.11667	2.57594	2.55694	3.30507
5.11944	2.57259	2.55833	3.29103
5.12222	2.55537	2.55972	3.29574
5.125	2.58783	2.56111	3.31577
5.12778	2.57809	2.5625	3.30748
5.13056	2.57527	2.56389	3.29617
5.13333	2.56795	2.56528	3.27631
5.13611	2.58481	2.56667	3.3114
5.13889	2.57807	2.56806	3.29955
5.14167	2.58595	2.56944	3.29268
5.14444	2.5857	2.57083	3.27873
5.14722	2.58401	2.57222	3.32512
5.15	2.5921	2.57361	3.32278
5.15278	2.55728	2.575	3.28233
5.15556	2.56355	2.57639	3.29003
5.15833	2.57418	2.57778	3.32563
5.16111	2.56582	2.57917	3.28771
5.16389	2.58953	2.58056	3.28921
5.16667	2.56446	2.58194	3.31804
5.16944	2.59503	2.58333	3.29517
5.17222	2.5731	2.58472	3.32451
5.175	2.56043	2.58611	3.29846
5.17778	2.56828	2.5875	3.31204
5.18056	2.56888	2.58889	3.29723
5.18333	2.57065	2.59028	3.31372
5.18611	2.56767	2.59167	3.29127
5.18889	2.58936	2.59306	3.27868
5.19167	2.5623	2.59444	3.29688
5.19444	2.5684	2.59583	3.30507
5.19722	2.57853	2.59722	3.32303
5.2	2.54617	2.59861	3.30729
5.20278	2.60107	2.6	3.34078
5.20556	2.55465	2.60139	3.31706
5.20833	2.59267	2.60278	3.29691
5.21111	2.57152	2.60417	3.32208
5.21389	2.5824	2.60556	3.29952
5.21667	2.58232	2.60694	3.32854
5.21944	2.54864	2.60833	3.28417
5.22222	2.59117	2.60972	3.28175
5.225	2.56345	2.61111	3.30686
5.22778	2.55633	2.6125	3.29865
5.23056	2.58085	2.61389	3.3133
5.23333	2.59172	2.61528	3.27812
5.23611	2.57703	2.61667	3.30667
5.23889	2.58207	2.61806	3.26986
5.24167	2.56543	2.61944	3.28865
5.24444	2.57641	2.62083	3.30477
5.24722	2.59103	2.62222	3.28709
5.25	2.57369	2.62361	3.32011
5.25278	2.57476	2.625	3.27585
5.25556	2.58999	2.62639	3.30409
5.25833	2.57062	2.62778	3.29466
5.26111	2.58684	2.62917	3.28285
5.26389	2.57363	2.63056	3.31011
5.26667	2.58317	2.63194	3.32329
5.26944	2.56865	2.63333	3.27893
5.27222	2.59735	2.63472	3.32578
5.275	2.58318	2.63611	3.28622
5.27778	2.57744	2.6375	3.30264
5.28056	2.57799	2.63889	3.29453
5.28333	2.5675	2.64028	3.31085
5.28611	2.57375	2.64167	3.29167
5.28889	2.56262	2.64306	3.30887
5.29167	2.56807	2.64444	3.30276
5.29444	2.57835	2.64583	3.31687
5.29722	2.57658	2.64722	3.2816
5.3	2.5719	2.64861	3.32205
5.30278	2.57025	2.65	3.2902
5.30556	2.58641	2.65139	3.29007
5.30833	2.57745	2.65278	3.32452
5.31111	2.59472	2.65417	3.31515
5.31389	2.57435	2.65556	3.30947
5.31667	2.55936	2.65694	3.28143
5.31944	2.58447	2.65833	3.2878
5.32222	2.5679	2.65972	3.30035
5.325	2.54888	2.66111	3.27204
5.32778	2.58494	2.6625	3.30945
5.33056	2.57355	2.66389	3.30257
5.33333	2.57883	2.66528	3.31448
5.33611	2.57663	2.66667	3.30181
5.33889	2.57989	2.66806	3.29868
5.34167	2.55707	2.66944	3.27505
5.34444	2.5839	2.67083	3.28991
5.34722	2.57221	2.67222	3.29683
5.35	2.57233	2.67361	3.29737
5.35278	2.59782	2.675	3.31133
5.35556	2.57149	2.67639	3.28818
5.35833	2.59906	2.67778	3.28724
5.36111	2.57072	2.67917	3.3035
5.36389	2.57732	2.68056	3.30637
5.36667	2.57463	2.68194	3.32108
5.36944	2.59161	2.68333	3.28532
5.37222	2.57024	2.68472	3.29518
5.375	2.54411	2.68611	3.29193
5.37778	2.57013	2.6875	3.28888
5.38056	2.59137	2.68889	3.33914
5.38333	2.56455	2.69028	3.28727
5.38611	2.59939	2.69167	3.31221
5.38889	2.57217	2.69306	3.28756
5.39167	2.5661	2.69444	3.31439
5.39444	2.58834	2.69583	3.32459
5.39722	2.57329	2.69722	3.31919
5.4	2.57851	2.69861	3.31689
5.40278	2.58267	2.7	3.3158
5.40556	2.59056	2.70139	3.33457
5.40833	2.61085	2.70278	3.29492
5.41111	2.587	2.70417	3.30164
5.41389	2.57964	2.70556	3.31368
5.41667	2.61545	2.70694	3.29591
5.41944	2.59299	2.70833	3.27018
5.42222	2.58439	2.70972	3.31967
5.425	2.60406	2.71111	3.29796
5.42778	2.57809	2.7125	3.29272
5.43056	2.58643	2.71389	3.31074
5.43333	2.57316	2.71528	3.30303
5.43611	2.5886	2.71667	3.28474
5.43889	2.58322	2.71806	3.30929
5.44167	2.573	2.71944	3.28552
5.44444	2.57527	2.72083	3.27268
5.44722	2.57777	2.72222	3.31491
5.45	2.6153	2.72361	3.30369
5.45278	2.60129	2.725	3.32637
5.45556	2.571	2.72639	3.2897
5.45833	2.57362	2.72778	3.30457
5.46111	2.56556	2.72917	3.29546
5.46389	2.56544	2.73056	3.27506
5.46667	2.58919	2.73194	3.30543
5.46944	2.60777	2.73333	3.30707
5.47222	2.59542	2.73472	3.31521
5.475	2.57987	2.73611	3.29085
5.47778	2.58654	2.7375	3.28115
5.48056	2.6078	2.73889	3.33158
5.48333	2.56332	2.74028	3.2873
5.48611	2.56416	2.74167	3.28715
5.48889	2.5722	2.74306	3.29157
5.49167	2.55656	2.74444	3.3103
5.49444	2.57192	2.74583	3.29456
5.49722	2.58844	2.74722	3.31374
5.5	2.583	2.74861	3.3095
5.50278	2.58118	2.75	3.2994
5.50556	2.57325	2.75139	3.31185
5.50833	2.59187	2.75278	3.30655
5.51111	2.60568	2.75417	3.31414
5.51389	2.59277	2.75556	3.29391
5.51667	2.59591	2.75694	3.31351
5.51944	2.57038	2.75833	3.3149
5.52222	2.58704	2.75972	3.27046
5.525	2.56918	2.76111	3.30328
5.52778	2.58479	2.7625	3.30725
5.53056	2.56376	2.76389	3.27182
5.53333	2.58123	2.76528	3.31861
5.53611	2.58507	2.76667	3.29284
5.53889	2.57138	2.76806	3.29391
5.54167	2.58411	2.76944	3.31516
5.54444	2.57542	2.77083	3.29446
5.54722	2.56729	2.77222	3.29351
5.55	2.57897	2.77361	3.29479
[truncated: 286,629+ more rows]

## Sheet: Fig. 2f
NiFe-SQ/NF-R	NiFe-SQ/NF-R	NiFe-LDH/NF-R	NiFe-LDH/NF-R
x	y	x	y
0.00616	1.01955	0.0093	1.01035
0.00634	1.04076	0.00918	1.02295
0.00652	1.06157	0.00949	1.03396
0.00699	1.08218	0.00975	1.04636
0.00755	1.10319	0.01005	1.05817
0.00812	1.1242	0.01042	1.07017
0.00884	1.145	0.0107	1.08298
0.00961	1.16681	0.0111	1.09458
0.01037	1.18702	0.01173	1.10639
0.01128	1.20883	0.01234	1.11859
0.01232	1.22984	0.01308	1.1302
0.01351	1.25065	0.01452	1.142
0.01451	1.27166	0.01682	1.15461
0.01545	1.29267	0.01866	1.16641
0.01654	1.31348	0.01992	1.17902
0.01763	1.33389	0.02104	1.19022
0.01898	1.35549	0.02169	1.20283
0.02061	1.3767	0.02221	1.21443
0.02223	1.39771	0.02278	1.22664
0.02418	1.41932	0.02355	1.23764
0.02599	1.43973	0.02411	1.25145
0.02829	1.45994	0.02414	1.26205
0.03189	1.48135	0.02504	1.27426
0.03723	1.50236	0.02556	1.28566
0.04386	1.52317	0.02582	1.29767
0.05165	1.54438	0.02667	1.31068
0.06035	1.56418	0.02772	1.32228
0.06978	1.58499	0.02852	1.33509
0.08072	1.6068	0.02926	1.34649
0.09268	1.62781	0.03002	1.3591
0.10592	1.64822	0.03092	1.3707
0.12175	1.67003	0.03174	1.38291
0.13916	1.69104	0.03246	1.39491
0.15936	1.71065	0.03405	1.40672
0.18346	1.73146	0.03591	1.41772
0.20993	1.75226	0.03936	1.43033
0.2417	1.77287	0.04335	1.44253
0.27684	1.79368	0.04733	1.45414
0.31704	1.81409	0.0521	1.46614
0.35978	1.8365	0.05766	1.47815
0.40693	1.85591	0.06412	1.48935
0.45836	1.87632	0.07157	1.50196
0.51324	1.89733	0.07916	1.51376
0.56957	1.91814	0.08802	1.52657
0.63072	1.93995	0.09767	1.53797
0.69244	1.95895	0.10771	1.54998
0.75278	1.97936	0.11781	1.56178
0.82512	2.00157	0.1304	1.57359
0.90263	2.02318	0.14226	1.58639
0.96626	2.04199	0.15565	1.5972
1.0576	2.0644	0.16945	1.6096
1.14124	2.08461	0.18391	1.62121
1.22168	2.10542	0.20018	1.63341
1.32496	2.12623	0.21572	1.64322
1.42543	2.14703	0.23419	1.65782
1.52118	2.16684	0.25431	1.67003
1.63529	2.18645	0.27218	1.68063
1.73822	2.20946	0.29571	1.69264
1.85402	2.23007	0.31979	1.70464
1.97423	2.25188	0.34371	1.71625
2.08155	2.27129	0.37099	1.72865
2.20331	2.2919	0.39972	1.74026
2.31072	2.3125	0.43279	1.75307
2.43584	2.33611	0.46147	1.76447
2.56683	2.35672	0.49704	1.77587
2.67916	2.38153	0.53471	1.78828
2.79661	2.40174	0.57085	1.80009
2.89739	2.42255	0.61364	1.81089
3.01761	2.44016	0.65644	1.8233
3.12373	2.46297	0.6994	1.8355
		0.74641	1.84671
		0.7951	1.85911
		0.85211	1.87092
		0.90382	1.88252
		0.96102	1.89493
		1.01954	1.90633
		1.08187	1.91854
		1.14565	1.93054
		1.21473	1.94175
		1.28516	1.95355
		1.36588	1.96516
		1.44195	1.97776
		1.5271	1.98937
		1.61055	2.00097
		1.7075	2.01238
		1.81552	2.02458
		1.91912	2.03559
		2.02411	2.04699
		2.152	2.0594
		2.26968	2.071
		2.40651	2.08201
		2.54094	2.09421
		2.67931	2.10522
		2.8585	2.11762
		3.0121	2.12823
		3.18672	2.14083
		3.38778	2.15204

## Sheet: Fig. 2g
	x	y
	3	2.13
	0.25	2
	0.5	1.734
	1	1.89
	0.685	1.85
	1	1.84
	1	1.9
	0.5	1.73
	0.947	1.85
	0.824	2
	1	1.97
	1	2.24
	1	1.99
	1.32	3
	1.55	2
	2.07	2

## Sheet: Fig. 3a
NiFe-LDH/NF-R										NiFe-SQ/NF-R
x	y	y	y	y	y	y	y	y	y	x	y	y	y	y	y	y	y	y	y
890.27	83195	84517.1	83120	83151.6	83137.4	83302.8	83172.4	83168.6	84184.5	887.3	151105	153619	151015	151066	151044	151268	151132	151088	153095
890.18	83291	84462.1	83045.1	83076.9	83062.6	83229	83097.9	83094.1	84126.9	887.2	151111	153586	150925	150977	150954	151180	151044	150999	153056
890.09	83421.5	84407.7	82970.2	83002.2	82987.8	83155.4	83023.7	83019.9	84069.9	887.1	151308	153554	150835	150887	150864	151092	150956	150910	153020
890	84715.5	84353.9	82895.6	82927.7	82913.2	83081.9	82949.6	82945.8	84013.6	887	150413	153525	150745	150797	150774	151004	150867	150822	152985
889.91	85318.5	84301.6	82821.9	82854.1	82839.6	83009.4	82876.5	82872.6	83958.6	886.9	149982	153499	150655	150708	150685	150916	150779	150733	152953
889.82	83330.5	84250.2	82748.6	82781.1	82766.5	82937.3	82803.9	82800.1	83904.6	886.8	150645	153475	150565	150618	150595	150828	150691	150644	152923
889.73	80743.5	84197.9	82674.1	82706.7	82692.1	82863.9	82729.9	82726.1	83849.6	886.7	150981	153453	150475	150528	150505	150740	150603	150556	152896
889.64	82582.5	84144.5	82597.7	82630.5	82615.8	82788.8	82654.1	82650.3	83793.4	886.6	150961	153434	150385	150439	150415	150652	150515	150467	152871
889.55	83218	84092.9	82522.7	82555.6	82540.9	82715	82579.8	82575.9	83739.1	886.5	150247	153418	150295	150349	150325	150564	150426	150378	152849
889.46	83584.5	84042.4	82448.1	82481.4	82466.4	82641.8	82505.9	82502.1	83685.9	886.4	149831	153406	150205	150259	150236	150476	150338	150289	152830
889.37	83970.5	83992.9	82374	82407.3	82392.4	82568.9	82432.3	82428.5	83633.4	886.3	150052	153396	150115	150170	150146	150388	150251	150201	152815
889.28	85198.5	83944.2	82300.1	82333.6	82318.6	82496.2	82359.1	82355.3	83581.9	886.2	150476	153391	150025	150080	150056	150301	150163	150112	152803
889.19	85417	83897.2	82227.2	82260.9	82245.8	82424.6	82286.9	82283.1	83532.1	886.1	150586	153388	149935	149990	149966	150213	150075	150024	152794
889.1	82674	83851.1	82154.5	82188.4	82173.2	82353.2	82214.9	82211.1	83482.9	886	150809	153390	149844	149900	149876	150125	149987	149935	152790
889.01	83168	83803.6	82079.9	82113.9	82098.6	82279.9	82140.9	82137.1	83432.5	885.9	150919	153396	149754	149810	149786	150037	149898	149846	152789
888.92	81746.5	83757.4	82005.6	82039.9	82024.6	82207	82067.4	82063.6	83383.2	885.8	150974	153407	149664	149720	149696	149949	149810	149758	152793
888.83	81845	83710.9	81930.5	81964.9	81949.5	82133.1	81992.9	81989.1	83333.6	885.7	150842	153422	149573	149630	149606	149861	149722	149669	152801
888.74	79618.5	83665.2	81855.4	81890.1	81874.6	82059.4	81918.6	81914.9	83284.9	885.6	150510	153443	149483	149540	149516	149773	149634	149580	152814
888.65	80341	83618.9	81778.8	81813.6	81798	81984.2	81842.7	81838.9	83235.4	885.5	150378	153469	149392	149450	149425	149685	149546	149491	152833
888.56	80302	83573.9	81702.8	81737.8	81722.1	81909.6	81767.4	81763.7	83187.2	885.4	150094	153500	149302	149360	149335	149597	149458	149403	152858
888.47	82359.5	83529.9	81626.8	81661.9	81646.2	81834.9	81692.2	81688.5	83139.9	885.3	150068	153539	149212	149270	149245	149509	149371	149314	152888
888.38	82476.5	83488.2	81552.3	81587.7	81571.9	81761.9	81618.5	81614.8	83095	885.2	150951	153584	149122	149180	149155	149421	149283	149226	152926
888.29	79871.5	83447.6	81477.9	81513.6	81497.6	81688.9	81544.9	81541.2	83051.1	885.1	151216	153635	149031	149090	149065	149333	149195	149137	152969
888.2	81749	83406.2	81401.8	81437.6	81421.6	81614.2	81469.6	81465.9	83006.4	885	151412	153694	148940	149000	148974	149245	149107	149049	153020
888.11	81950	83367.3	81327.1	81363.1	81346.9	81540.9	81395.6	81392.1	82964	884.9	152202	153760	148849	148910	148884	149157	149019	148960	153078
888.02	80310	83329.6	81252.5	81288.7	81272.5	81467.8	81321.9	81318.4	82922.9	884.8	152796	153835	148758	148819	148793	149068	148931	148871	153145
887.93	81735	83291.9	81176.9	81213.2	81196.9	81393.6	81247.1	81243.6	82881.6	884.7	152892	153918	148667	148728	148702	148979	148842	148782	153220
887.84	82874.5	83256.5	81102.2	81138.8	81122.4	81320.5	81173.4	81169.9	82842.6	884.6	152693	154011	148575	148637	148610	148891	148754	148692	153304
887.75	81554	83223.1	81028.5	81065.3	81048.9	81248.2	81100.6	81097.1	82805.7	884.5	152875	154113	148484	148546	148519	148802	148666	148603	153397
887.66	83223.5	83190.2	80953.9	80990.9	80974.4	81175.1	81026.9	81023.4	82769.1	884.4	153343	154226	148392	148455	148428	148713	148577	148514	153501
887.57	81363	83159.9	80880.5	80917.7	80901.1	81103.4	80954.4	80950.9	82735	884.3	154029	154350	148301	148363	148336	148624	148489	148425	153616
887.48	81845.5	83129.7	80805.9	80843.2	80826.6	81030.2	80880.6	80877.2	82701.1	884.2	154354	154485	148209	148272	148245	148535	148400	148336	153741
887.39	81431	83101.4	80731.6	80769.2	80752.4	80957.6	80807.4	80803.9	82668.9	884.1	154306	154632	148117	148180	148153	148446	148312	148246	153878
887.3	79878	83074.4	80657.1	80694.9	80678.1	80884.6	80733.9	80730.5	82638	884	154474	154792	148025	148089	148061	148357	148223	148157	154028
887.21	79027.5	83048	80581.6	80619.6	80602.6	80810.7	80659.2	80655.9	82607.6	883.9	154978	154965	147932	147997	147969	148268	148135	148067	154191
887.12	79758.5	83022.8	80505.4	80543.7	80526.6	80736.2	80584.1	80580.9	82578.4	883.8	155938	155152	147840	147905	147877	148178	148046	147978	154368
887.03	82075.5	82999.9	80429.9	80468.4	80451.2	80662.3	80509.6	80506.4	82551.4	883.7	156592	155353	147747	147812	147784	148088	147957	147888	154559
886.94	85455	82980.8	80356.1	80394.8	80377.6	80590.1	80436.9	80433.7	82528.1	883.6	156605	155570	147654	147720	147692	147998	147868	147798	154764
886.85	82185	82966.1	80284.8	80323.6	80306.4	80520.4	80366.6	80363.5	82509.1	883.5	156971	155802	147561	147627	147599	147908	147779	147708	154985
886.76	81254	82951.1	80211.1	80250.2	80232.9	80448.5	80294.1	80291	82489.9	883.4	157425	156050	147468	147535	147506	147818	147690	147618	155222
886.67	79492.5	82937.9	80136.9	80176.2	80158.7	80376	80220.9	80217.9	82472.4	883.3	157668	156315	147374	147442	147413	147728	147601	147528	155476
886.58	80798	82925.7	80061.4	80101	80083.4	80302.2	80146.6	80143.6	82455.8	883.2	158110	156598	147281	147349	147320	147638	147512	147438	155746
886.49	82082.5	82917.1	79986.9	80026.8	80009.1	80229.5	80073.3	80070.4	82442.6	883.1	158600	156899	147187	147255	147226	147547	147423	147348	156035
886.4	81639.5	82911.9	79913.4	79953.5	79935.7	80157.8	80000.9	79998.2	82432.9	883	158980	157218	147093	147162	147133	147457	147334	147258	156341
886.31	80384	82909.4	79839.6	79880	79862.1	80085.8	79928.4	79925.7	82425.7	882.9	159091	157556	146999	147068	147039	147366	147244	147167	156666
886.22	81296	82908.9	79765.1	79805.6	79787.6	80013	79855.1	79852.4	82420.4	882.8	159264	157913	146905	146975	146945	147275	147155	147077	157010
886.13	83651.5	82912	79691.1	79731.9	79713.8	79940.9	79782.4	79779.9	82418.8	882.7	160075	158291	146811	146881	146851	147185	147066	146987	157374
886.04	81576	82920.1	79619	79660.1	79641.8	79870.6	79711.5	79709.1	82422.1	882.6	161044	158688	146716	146787	146757	147094	146977	146897	157757
885.95	79601	82930.2	79545.4	79586.7	79568.4	79798.9	79639.2	79636.9	82427.2	882.5	161456	159105	146621	146693	146662	147002	146888	146806	158160
885.86	81506	82942.5	79470.4	79511.9	79493.6	79725.8	79565.6	79563.4	82434.4	882.4	161524	159542	146526	146598	146567	146911	146798	146716	158582
885.77	81960.5	82959.9	79396.9	79438.7	79420.1	79654.2	79493.4	79491.3	82446.7	882.3	161341	160000	146431	146503	146473	146819	146709	146626	159025
885.68	82805	82981.7	79323.8	79365.8	79347.1	79582.9	79421.7	79419.6	82463.2	882.2	162345	160478	146336	146409	146378	146728	146620	146536	159488
885.59	83204.5	83008.1	79251.2	79293.6	79274.8	79512.4	79350.6	79348.6	82484.4	882.1	163706	160976	146240	146314	146283	146636	146531	146445	159969
885.5	82720.5	83039.4	79179.1	79221.6	79202.8	79442.2	79279.9	79278.1	82510.2	882	163562	161492	146144	146218	146187	146544	146441	146355	160469
885.41	82418.5	83074.9	79106.6	79149.4	79130.4	79371.8	79208.9	79207.2	82540.2	881.9	163433	162027	146048	146123	146091	146452	146352	146264	160986
885.32	81787.5	83114.9	79034	79077.1	79058	79301.1	79137.9	79136.3	82574.6	881.8	164057	162580	145952	146028	145996	146360	146263	146174	161521
885.23	82598	83159.6	78961	79004.3	78985.1	79230.1	79066.4	79064.9	82613.6	881.7	164993	163148	145856	145932	145900	146268	146174	146084	162071
885.14	82753.5	83210.1	78888.6	78932.2	78912.9	79159.9	78995.6	78994.3	82658.4	881.6	165415	163730	145760	145836	145804	146175	146085	145994	162635
885.05	83066	83266.4	78816.4	78860.2	78840.8	79089.7	78925	78923.9	82708.6	881.5	166207	164325	145663	145740	145707	146083	145996	145904	163210
884.96	83512	83328.6	78744.4	78788.6	78769.1	79019.9	78854.7	78853.8	82764.8	881.4	167271	164929	145566	145643	145610	145990	145907	145813	163794
884.87	81975	83397.2	78672.9	78717.2	78697.6	78950.4	78784.9	78784.1	82827.3	881.3	167545	165540	145468	145546	145513	145897	145818	145723	164385
884.78	83683	83470.9	78600.2	78644.9	78625.1	78879.9	78713.9	78713.4	82894.8	881.2	167097	166155	145371	145450	145416	145803	145728	145633	164978
884.69	82967	83552.6	78528.9	78573.8	78553.9	78810.8	78644.4	78644	82970	881.1	167021	166769	145273	145353	145319	145710	145640	145543	165570
884.6	84468	83640.6	78457.1	78502.3	78482.3	78741.2	78574.4	78574.2	83051.5	881	166958	167378	145176	145256	145222	145617	145552	145454	166157
884.51	82093.5	83736.6	78386.4	78431.9	78411.8	78672.8	78505.6	78505.6	83140.9	880.9	167611	167978	145078	145159	145125	145524	145464	145365	166732
884.42	83843.5	83838.6	78314.1	78359.8	78339.6	78602.6	78435.2	78435.4	83236.1	880.8	167840	168562	144981	145062	145028	145431	145376	145276	167292
884.33	84920.5	83949.3	78243	78289.1	78268.8	78533.9	78366.1	78366.6	83339.9	880.7	167986	169124	144883	144965	144930	145338	145288	145188	167829
884.24	83855.5	84068.9	78172.8	78219.1	78198.8	78466.1	78297.9	78298.6	83452.4	880.6	168810	169659	144785	144867	144832	145245	145201	145099	168338
884.15	83216	84195.9	78101.9	78148.6	78128	78397.4	78229.1	78230.1	83572.2	880.5	169770	170159	144687	144770	144735	145151	145114	145011	168810
884.06	83197	84331	78030.6	78077.5	78056.8	78328.5	78159.9	78161.1	83700.1	880.4	170157	170617	144588	144672	144636	145058	145027	144924	169240
883.97	84797	84474.9	77959.3	78006.5	77985.7	78259.6	78090.8	78092.2	83836.5	880.3	169484	171027	144489	144574	144538	144964	144940	144836	169621
883.88	86469.5	84629	77889.2	77936.8	77915.8	78191.9	78022.9	78024.7	83982.9	880.2	168894	171383	144391	144476	144440	144870	144854	144749	169946
883.79	85910	84793.8	77820.4	77868.2	77847.1	78125.6	77956.3	77958.4	84139.9	880.1	170109	171678	144292	144378	144342	144777	144769	144663	170210
883.7	84917	84967.6	77751.1	77799.4	77778.1	78058.9	77889.4	77891.9	84305.8	880	170729	171907	144193	144280	144244	144683	144684	144578	170405
883.61	86473	85150.8	77681.3	77729.8	77708.4	77991.6	77822	77824.8	84480.8	879.9	170837	172064	144094	144182	144145	144590	144599	144492	170528
883.52	87437.5	85345.1	77612.6	77661.4	77639.9	77925.4	77755.8	77758.9	84666.7	879.8	170697	172147	143995	144083	144046	144496	144515	144408	170575
883.43	87002	85550.5	77544.7	77593.8	77572.2	77860.1	77690.4	77693.9	84863.6	879.7	170548	172154	143896	143985	143947	144402	144431	144324	170543
883.34	86929	85766.1	77476.5	77525.9	77504.2	77794.4	77624.8	77628.7	85070.4	879.6	170828	172082	143797	143886	143849	144308	144348	144241	170432
883.25	85344	85992.4	77408.2	77458	77436.1	77728.9	77559.2	77563.6	85287.9	879.5	170442	171932	143697	143788	143750	144215	144266	144159	170242
883.16	87421	86228.6	77338.9	77389.1	77367.1	77662.3	77492.6	77497.4	85515.1	879.4	169921	171707	143598	143689	143651	144121	144185	144078	169974
883.07	87539	86477.2	77271.2	77321.6	77299.5	77597.2	77427.7	77433	85754.3	879.3	170721	171409	143499	143591	143552	144028	144104	143998	169631
882.98	87109.5	86737.3	77203.6	77254.3	77232.1	77532.4	77362.9	77368.8	86004.8	879.2	170917	171042	143400	143492	143454	143935	144024	143920	169216
882.89	86628.5	87008.1	77135.7	77186.8	77164.4	77467.2	77298	77304.4	86265.9	879.1	170754	170612	143300	143394	143355	143841	143946	143842	168736
882.8	86706.5	87290.1	77067.5	77118.9	77096.4	77401.9	77232.9	77239.8	86537.9	879	170697	170123	143201	143295	143256	143748	143868	143766	168196
882.71	87953.5	87583.2	76999.4	77051.2	77028.5	77336.6	77167.9	77175.4	86820.7	878.9	169926	169584	143102	143196	143157	143655	143791	143691	167602
882.62	89986.5	87888.7	76932.3	76984.4	76961.6	77272.4	77104.1	77112.1	87115.7	878.8	169715	169000	143002	143098	143058	143562	143715	143618	166960
882.53	89674	88206.5	76866.7	76919.1	76896.1	77209.7	77041.8	77050.4	87422.8	878.7	168690	168380	142903	143000	142959	143469	143641	143547	166279
882.44	90089	88535.3	76800.9	76853.7	76830.6	77146.9	76979.4	76988.8	87740.5	878.6	167920	167730	142804	142902	142861	143377	143569	143478	165564
882.35	90245	88875.1	76735.4	76788.6	76765.4	77084.4	76917.4	76927.5	88068.9	878.5	167200	167057	142706	142804	142763	143285	143498	143411	164824
882.26	88571.5	89225	76670.1	76723.6	76700.2	77022.2	76855.8	76866.6	88407.2	878.4	166985	166368	142607	142706	142665	143193	143429	143347	164063
882.17	90283	89583.8	76603.7	76657.6	76634	76958.8	76793	76804.7	88754.1	878.3	166528	165668	142509	142609	142567	143102	143361	143285	163287
882.08	90083.5	89952.9	76538.5	76592.8	76569.1	76896.8	76731.7	76744.2	89111	878.2	165847	164965	142410	142512	142470	143011	143296	143227	162503
881.99	92647	90330.7	76473.2	76527.9	76504	76834.6	76670.4	76683.8	89476.2	878.1	165423	164262	142312	142414	142372	142920	143232	143171	161714
881.9	91746	90717.9	76409.9	76464.9	76440.9	76774.5	76611.1	76625.4	89850.5	878	164371	163566	142214	142317	142275	142829	143171	143120	160926
881.81	92241.5	91111.5	76345.9	76401.2	76377.1	76713.8	76551.3	76566.6	90230.9	877.9	163857	162879	142117	142221	142178	142739	143112	143072	160143
881.72	92862.5	91511.1	76282.3	76338.1	76313.8	76653.4	76492.1	76508.4	90616.9	877.8	162737	162207	142020	142124	142081	142649	143056	143028	159366
881.63	92723	91915.4	76219.2	76275.4	76250.9	76593.7	76433.4	76450.9	91007.1	877.7	161782	161553	141922	142028	141984	142560	143003	142990	158600
881.54	92706	92322.6	76156.1	76212.6	76187.9	76533.9	76374.9	76393.6	91399.9	877.6	161205	160920	141826	141932	141888	142471	142953	142957	157847
881.45	93589.5	92730.8	76092.9	76149.9	76125.1	76474.2	76316.6	76336.5	91793.2	877.5	160517	160310	141729	141836	141792	142382	142906	142930	157109
881.36	94649	93139.2	76030.5	76087.9	76062.9	76415.3	76259.1	76280.3	92186.4	877.4	159959	159728	141632	141741	141696	142294	142862	142910	156386
881.27	93499.5	93545.3	75968.9	76026.6	76001.5	76357.2	76202.6	76225.1	92576.7	877.3	160105	159174	141536	141646	141600	142206	142822	142898	155681
881.18	94681	93945.9	75906.5	75964.6	75939.4	76298.4	76145.4	76169.5	92961.1	877.2	159402	158651	141440	141550	141505	142118	142787	142896	154995
881.09	94672	94339.4	75844.9	75903.5	75878.1	76240.4	76089.4	76115	93337.9	877.1	158462	158163	141344	141455	141409	142030	142755	142904	154327
881	97692.5	94723.1	75783.5	75842.4	75816.9	76182.6	76033.6	76060.8	93704.2	877	158792	157712	141248	141360	141314	141943	142729	142924	153680
880.91	95289.5	95095.8	75724.2	75783.6	75757.8	76127.1	75980.1	76009.1	94059.1	876.9	158887	157300	141152	141265	141218	141856	142708	142959	153052
880.82	96538.5	95450.6	75663.3	75723.1	75697.1	76069.9	75925.2	75956.1	94395.5	876.8	158457	156932	141056	141170	141123	141769	142692	143011	152444
880.73	96817	95787.4	75603.3	75663.5	75637.4	76013.8	75871.5	75904.3	94713.3	876.7	158315	156610	140960	141076	141028	141682	142682	143083	151857
880.64	97278	96101.9	75543.5	75604.2	75577.9	75957.9	75818.2	75853.1	95008.2	876.6	158223	156339	140864	140981	140932	141596	142680	143180	151289
880.55	95168	96391.8	75484.1	75545.2	75518.8	75902.4	75765.6	75802.7	95277.8	876.5	158157	156125	140768	140886	140837	141509	142685	143304	150741
880.46	96644	96651.5	75423.2	75484.8	75458.1	75845.5	75711.6	75751.2	95516.5	876.4	158294	155972	140672	140791	140742	141423	142699	143463	150212
880.37	97034.5	96881.2	75363.5	75425.5	75398.6	75789.8	75659.1	75701.2	95724.4	876.3	157976	155887	140576	140696	140647	141337	142723	143660	149702
880.28	96603	97076.9	75304.1	75366.5	75339.5	75734.5	75607.2	75651.9	95897.7	876.2	158149	155877	140480	140601	140551	141252	142757	143902	149212
880.19	96450	97236.1	75244.4	75307.3	75280.1	75678.9	75555.4	75602.9	96033.4	876.1	158265	155950	140384	140506	140456	141166	142804	144197	148739
880.1	96427.5	97356.5	75184.6	75248	75220.6	75623.4	75503.6	75554.3	96129.6	876	158539	156114	140287	140411	140361	141080	142864	144550	148284
880.01	95259.5	97436.4	75124.9	75188.7	75161.1	75567.9	75452.4	75506.2	96184.4	875.9	159572	156378	140191	140316	140265	140995	142941	144970	147846
879.92	95283.5	97473.9	75064.4	75128.6	75100.9	75511.8	75400.6	75457.9	96195.8	875.8	159339	156751	140094	140221	140169	140909	143036	145464	147424
879.83	96972.5	97468.9	75003.9	75068.6	75040.7	75455.7	75349.2	75410.2	96163.7	875.7	159628	157242	139998	140126	140074	140824	143153	146038	147018
879.74	97507.5	97422.4	74944.6	75009.9	74981.8	75400.9	75299.4	75364.4	96089.1	875.6	160599	157862	139901	140030	139978	140739	143295	146699	146627
879.65	96014.5	97333.9	74885.9	74951.6	74923.2	75346.7	75250.6	75319.8	95971.2	875.5	160659	158617	139804	139934	139881	140654	143467	147450	146251
879.56	96565	97202.6	74826	74892.3	74863.8	75291.5	75201	75274.8	95809.4	875.4	161123	159513	139707	139838	139785	140568	143675	148291	145889
879.47	95266.5	97031.1	74766.6	74833.4	74804.6	75236.8	75152.4	75231	95606.1	875.3	161625	160553	139610	139742	139688	140484	143925	149221	145540
879.38	96034.5	96820.2	74706.4	74773.6	74744.7	75181.2	75103.2	75187.1	95362.1	875.2	162196	161734	139512	139646	139592	140398	144226	150227	145204
879.29	95016	96573.1	74646.7	74714.4	74685.3	75126.4	75055.2	75144.8	95080.4	875.1	163468	163044	139414	139550	139495	140314	144587	151290	144880
879.2	95039	96291.4	74586.3	74654.6	74625.2	75070.9	75007.1	75102.6	94762.5	875	164834	164460	139316	139453	139397	140228	145018	152375	144568
879.11	93935.5	95978.3	74526	74594.8	74565.2	75015.6	74959.6	75061.5	94411.6	874.9	165539	165945	139217	139356	139300	140143	145532	153434	144267
879.02	92660.5	95636.4	74464.9	74534.3	74504.5	74959.6	74911.9	75020.7	94030.2	874.8	166387	167447	139118	139258	139201	140058	146144	154401	143975
878.93	94065	95268.4	74403	74472.9	74442.9	74902.8	74863.9	74980.2	93620.8	874.7	167317	168899	139019	139160	139103	139972	146868	155196	143694
878.84	95816	94879.8	74342.1	74412.6	74382.4	74847.1	74817.6	74942.1	93188.8	874.6	168267	170238	138919	139062	139004	139887	147720	155739	143421
878.75	92270	94473.6	74282.6	74353.6	74323.1	74792.8	74773.4	74906.5	92737.1	874.5	170206	171410	138819	138963	138905	139801	148717	155960	143158
878.66	94264.5	94049.9	74220.5	74292	74261.4	74736.1	74727.4	74869.9	92265.5	874.4	171392	172394	138718	138864	138805	139716	149874	155823	142902
878.57	93073	93615.7	74159.9	74232	74201.1	74680.9	74683.6	74836.4	91781.1	874.3	171898	173210	138617	138764	138705	139630	151209	155332	142654
878.48	94771	93171.4	74098.4	74171.1	74140.1	74625.1	74639.9	74803.7	91283.9	874.2	172839	173913	138516	138665	138605	139544	152732	154533	142413
878.39	94121	92722.8	74038.3	74111.6	74080.2	74570.6	74598.4	74774.1	90779.5	874.1	174270	174585	138414	138564	138504	139458	154453	153495	142179
878.3	93556	92270.1	73977.8	74051.6	74020	74515.6	74557.4	74746.1	90268.1	874	175874	175306	138311	138464	138402	139372	156370	152303	141951
878.21	94350.5	91816.8	73916.8	73991.2	73959.4	74460.6	74517.1	74719.9	89752.6	873.9	177378	176145	138208	138362	138301	139286	158476	151032	141729
878.12	92853	91365.6	73856.5	73931.5	73899.5	74406.1	74478.5	74696.8	89235.6	873.8	178433	177137	138105	138261	138198	139200	160745	149746	141513
878.03	92204	90917.8	73795.1	73870.8	73838.5	74350.8	74440.1	74675.2	88718.2	873.7	179254	178276	138001	138159	138096	139114	163122	148491	141301
877.94	91697	90475.4	73733.4	73809.6	73777.1	74295.1	74402.4	74656	88202	873.6	180185	179513	137897	138056	137992	139027	165530	147297	141095
877.85	89812	90041	73671.2	73748.1	73715.4	74239.2	74365.9	74639.7	87688.9	873.5	181278	180742	137792	137953	137889	138941	167844	146183	140893
877.76	90497	89615.4	73607.9	73685.3	73652.4	74182.1	74329.6	74625.6	87179.9	873.4	182275	181815	137688	137850	137785	138855	169910	145157	140695
877.67	91516	89201.9	73545	73623.1	73589.9	74125.6	74295.4	74615.9	86677	873.3	182413	182555	137582	137747	137681	138769	171545	144222	140502
877.58	88454.5	88802.6	73482.9	73561.6	73528.1	74070	74263.6	74611.2	86182.4	873.2	182136	182780	137477	137643	137577	138684	172571	143377	140312
877.49	88705	88415.8	73418.6	73498.1	73464.3	74012.4	74231.6	74609.4	85693.4	873.1	180957	182357	137372	137540	137473	138599	172860	142617	140126
877.4	85789	88045.8	73354.6	73434.7	73400.7	73955.1	74201.7	74613.2	85213.5	873	180078	181231	137266	137437	137369	138515	172361	141937	139944
877.31	89249.5	87691.5	73288.6	73369.2	73335.1	73895.9	74172.1	74621.4	84740.7	872.9	179782	179443	137162	137334	137266	138431	171125	141330	139766
877.22	89421	87359.1	73225	73306.4	73271.9	73839.3	74147.2	74639.1	84280.2	872.8	177534	177116	137057	137231	137162	138348	169280	140788	139591
877.13	87785.5	87048.3	73161.6	73243.8	73208.9	73783.1	74125.1	74665.2	83830.6	872.7	175456	174421	136953	137130	137060	138267	167007	140304	139420
877.04	87383.5	86759	73097.1	73179.9	73144.9	73725.8	74104.8	74699.6	83389.9	872.6	173486	171530	136850	137028	136958	138187	164483	139872	139252
876.95	89999.5	86494.4	73032.4	73115.9	73080.6	73668.3	74087.1	74744.5	82960.1	872.5	170912	168598	136747	136928	136857	138108	161870	139485	139087
876.86	89009.5	86258.4	72969.6	73053.8	73018.2	73612.9	74074.8	74803.9	82542.8	872.4	167388	165736	136646	136828	136756	138031	159287	139136	138926
876.77	90538	86051.1	72906.1	72991.1	72955.1	73557.1	74065.4	74876.9	82136.1	872.3	165177	163020	136545	136730	136657	137955	156814	138821	138769
876.68	89480.5	85876.6	72843.8	72929.4	72893.3	73502.4	74061.2	74967.9	81741.4	872.2	162417	160499	136445	136632	136559	137881	154506	138534	138614
876.59	86303.5	85736.1	72780.8	72867.1	72830.7	73447.2	74060.6	75077.1	81357.1	872.1	159605	158192	136346	136536	136461	137808	152385	138271	138462
876.5	85058	85631.4	72715.4	72802.6	72765.9	73390	74062.7	75206.1	80981.4	872	157130	156108	136248	136440	136365	137737	150466	138028	138313
876.41	86353	85567.2	72649.4	72737.2	72700.2	73332	74069.3	75359.4	80615.7	871.9	154142	154241	136151	136345	136269	137668	148744	137803	138167
876.32	87328.5	85549.3	72584.1	72672.8	72635.5	73275.1	74082.8	75542.1	80261.9	871.8	151568	152581	136055	136251	136175	137600	147212	137593	138024
876.23	87348	85581.8	72519.8	72609.1	72571.6	73219.1	74103.8	75757.8	79919.1	871.7	148621	151113	135960	136158	136081	137534	145858	137396	137883
876.14	86975	85668.4	72455.4	72545.6	72507.7	73163.4	74132.2	76009.4	79587.1	871.6	146525	149820	135865	136067	135988	137470	144666	137210	137745
876.05	87316	85813.7	72390.9	72481.8	72443.6	73107.6	74169	76301.1	79264.8	871.5	144668	148684	135772	135976	135896	137407	143621	137034	137609
875.96	87292	86023.1	72326.6	72418.4	72379.9	73052.2	74215.6	76637.1	78952.9	871.4	142781	147688	135679	135885	135805	137346	142705	136865	137475
875.87	85830.5	86301.7	72262.3	72354.9	72316.1	72997.1	74273.2	77021.4	78650.6	871.3	140751	146814	135586	135795	135714	137287	141902	136704	137343
875.78	85730	86653.2	72197.1	72290.5	72251.4	72941	74342.3	77456.5	78356.9	871.2	138933	146046	135494	135706	135624	137229	141197	136550	137213
875.69	89338.5	87084.4	72131.8	72226.1	72186.6	72885.1	74426.1	77947.1	78072.3	871.1	137931	145370	135403	135618	135535	137172	140576	136401	137084
875.6	89405	87602.1	72069.1	72164.2	72124.5	72832.1	74529.6	78498.1	77799.2	871	137303	144772	135312	135530	135446	137117	140027	136257	136958
875.51	90415.5	88207.6	72006.6	72102.6	72062.5	72779.4	74653.1	79107.9	77535.1	870.9	136381	144241	135222	135442	135357	137064	139538	136117	136832
875.42	90368	88905.6	71944.8	72041.6	72001.2	72727.6	74801	79778.1	77280.1	870.8	135808	143767	135131	135354	135269	137011	139100	135981	136708
875.33	90102.5	89695.4	71883.1	71980.8	71940.1	72675.9	74976.6	80503.9	77033.4	870.7	135146	143341	135041	135267	135180	136960	138704	135849	136586
875.24	90506.5	90577	71821.1	71919.8	71878.7	72624.4	75185.2	81280.4	76794.2	870.6	134318	142957	134951	135180	135092	136911	138345	135720	136464
875.15	93643	91544.6	71759.6	71859.1	71817.7	72573.4	75432.9	82096.3	76563.1	870.5	134153	142608	134861	135093	135004	136863	138016	135594	136343
875.06	96826	92591.8	71700.3	71800.8	71758.9	72524.9	75728.9	82938.2	76341.4	870.4	133974	142290	134772	135007	134917	136816	137713	135470	136224
874.97	96840	93701.8	71643.4	71744.8	71702.6	72478.9	76081.1	83781.9	76129.1	870.3	134012	141998	134682	134920	134829	136771	137432	135349	136105
874.88	95545.5	94848.5	71586.4	71688.8	71646.3	72433.1	76495.7	84592.9	75923.8	870.2	133435	141729	134592	134834	134742	136727	137169	135230	135988
874.79	94166.5	96002.8	71528.6	71631.9	71589.1	72386.8	76982.3	85331.9	75723.9	870.1	132770	141480	134502	134747	134654	136685	136923	135112	135871
874.7	95561	97128.8	71469.9	71574.2	71531	72339.7	77550.6	85953.4	75529.4	870	133066	141251	134413	134661	134567	136644	136691	134997	135755
874.61	96588	98195.4	71412.2	71517.5	71473.9	72293.9	78214.3	86414.9	75341.9	869.9	133319	141037	134323	134575	134480	136605	136471	134883	135640
874.52	99803	99172.6	71355.3	71461.6	71417.6	72249.1	78983.4	86676.4	75160.9	869.8	133156	140838	134234	134489	134393	136568	136262	134771	135525
874.43	100523	100048	71300.7	71408.1	71363.7	72206.9	79871.4	86713.4	74987.6	869.7	132580	140653	134144	134403	134306	136532	136062	134660	135411
874.34	100793	100819	71246.7	71355.1	71310.4	72165.6	80885.1	86516.1	74820.1	869.6	132020	140481	134055	134317	134219	136499	135871	134550	135298
874.25	102456	101507	71192.9	71302.4	71257.2	72124.6	82033.2	86096.4	74657.8	869.5	132675	140320	133965	134232	134132	136468	135688	134442	135186
874.16	104708	102147	71140.4	71250.9	71205.4	72085.3	83320.8	85484.9	74501.4	869.4	133163	140170	133876	134146	134045	136438	135512	134334	135074
874.07	104182	102778	71089.5	71201.1	71155.1	72047.9	84746.4	84723.9	74351.3	869.3	132835	140030	133786	134060	133958	136410	135342	134227	134962
873.98	104916	103438	71038.2	71150.9	71104.6	72010.4	86301.9	83856.3	74205.1	869.2	132904	139900	133696	133975	133871	136385	135178	134122	134852
873.89	103182	104148	70987.6	71101.4	71054.6	71973.7	87965.4	82927.5	74063.6	869.1	133666	139779	133607	133889	133784	136362	135018	134016	134741
873.8	103740	104910	70935.8	71050.6	71003.5	71936.1	89701.3	81972.4	73924.8	869	133961	139666	133517	133803	133697	136342	134864	133912	134631
873.71	107670	105696	70884.3	71000.3	70952.8	71899.4	91450.9	81023.7	73790.1	868.9	134392	139561	133426	133718	133610	136324	134713	133808	134521
873.62	106438	106448	70835.7	70952.9	70904.9	71865.8	93136.4	80104.6	73661.8	868.8	134767	139465	133336	133632	133523	136309	134566	133705	134412
873.53	105058	107070	70786.3	70904.6	70856.2	71831.6	94644.7	79227.8	73536.1	868.7	134197	139376	133246	133546	133435	136296	134423	133602	134303
873.44	105126	107448	70735.9	70855.5	70806.6	71796.8	95855.1	78401.4	73412.4	868.6	133854	139295	133155	133460	133348	136287	134282	133500	134194
873.35	105535	107470	70685.6	70806.4	70757.1	71762.5	96647.9	77632.2	73291.9	868.5	134420	139222	133065	133374	133261	136281	134146	133398	134087
873.26	104264	107046	70635.6	70757.6	70707.9	71728.9	96931.8	76923	73174.6	868.4	134847	139156	132975	133289	133174	136279	134011	133297	133979
873.17	103844	106135	70584.8	70708.1	70657.9	71694.7	96667.3	76271.6	73059.1	868.3	135023	139097	132884	133203	133087	136280	133880	133197	133872
873.08	103134	104762	70533.7	70658.2	70607.6	71660.6	95880.4	75677.5	72946.1	868.2	135867	139046	132793	133117	133000	136285	133750	133096	133764
872.99	102298	103004	70482.1	70607.9	70556.9	71626.6	94651.1	75137.1	72834.8	868.1	136134	139002	132702	133031	132912	136294	133622	132996	133657
872.9	102624	100975	70429.9	70557.1	70505.6	71592.2	93096.6	74647.6	72725.4	868	136583	138966	132611	132946	132825	136308	133496	132896	133551
872.81	100278	98792.9	70378.1	70506.6	70454.6	71558.6	91339.7	74205.4	72618.4	867.9	137386	138937	132520	132860	132737	136326	133372	132796	133444
872.72	96963.5	96565.1	70324.6	70454.4	70401.9	71523.9	89490.9	73804.9	72511.9	867.8	137244	138916	132428	132774	132650	136349	133250	132696	133338
872.63	94237	94376.4	70268.7	70399.9	70346.9	71487.1	87639.5	73441.4	72405	867.7	137698	138903	132336	132688	132562	136378	133129	132597	133231
872.54	94771	92283.4	70210.9	70343.6	70290	71448.9	85846.4	73111.1	72298.1	867.6	138320	138898	132244	132602	132474	136413	133009	132498	133125
872.45	93831.5	90328.1	70153.6	70287.6	70233.6	71411.6	84157.1	72812.6	72193.4	867.5	138344	138902	132152	132516	132386	136454	132891	132398	133020
872.36	91209	88526.4	70095.6	70231.1	70176.5	71374.2	82591.8	72540.9	72089.6	867.4	138270	138915	132060	132430	132299	136502	132774	132300	132914
872.27	89140.5	86886.9	70035.8	70172.7	70117.6	71335.4	81162	72292.1	71985.8	867.3	137998	138938	131968	132344	132211	136557	132658	132201	132808
872.18	87372.5	85406.8	69974.4	70112.9	70057.3	71295.7	79868.4	72062.9	71881.9	867.2	138363	138970	131876	132258	132124	136620	132543	132103	132704
872.09	87568	84081.9	69911.9	70051.9	69995.8	71255.3	78709.1	71851.1	71778.4	867.1	138283	139013	131784	132172	132036	136692	132429	132004	132599
872	83674	82902	69849.6	69991.1	69934.5	71215.6	77677	71655.6	71676.4	867	139125	139067	131692	132087	131949	136772	132316	131906	132494
871.91	81048	81853.6	69784.6	69927.6	69870.4	71173.8	76760.4	71471.2	71572.9	866.9	140223	139132	131599	132002	131861	136863	132204	131808	132390
871.82	82012.5	80925.6	69717.6	69862.3	69804.6	71130.7	75950.2	71297.2	71468.9	866.8	140113	139210	131506	131916	131774	136964	132093	131710	132285
871.73	82012	80106.5	69651.5	69797.8	69739.4	71088.9	75236.7	71134.4	71366.8	866.7	139555	139300	131413	131830	131686	137076	131982	131612	132180
871.64	78249.5	79384.3	69585.4	69733.3	69674.4	71047.9	74609.1	70980.7	71265.9	866.6	140064	139404	131320	131745	131599	137200	131872	131514	132076
871.55	75971.5	78743.6	69516.6	69666.2	69606.7	71004.8	74053.2	70832.3	71163.4	866.5	140514	139523	131227	131660	131511	137337	131763	131416	131972
871.46	76182.5	78175	69446.2	69597.5	69537.4	70960.8	73560.9	70689.2	71060.3	866.4	140560	139657	131134	131574	131424	137488	131654	131318	131868
871.37	76751.5	77669.9	69376.1	69529.1	69468.4	70917.6	73124.1	70552.4	70958.4	866.3	140715	139808	131041	131489	131337	137655	131546	131221	131764
871.28	74959.5	77220.2	69306.4	69461.1	69399.9	70875.7	72735.6	70421.6	70858.1	866.2	140840	139976	130948	131405	131250	137837	131438	131123	131661
871.19	74956	76815.8	69235.4	69392	69330.1	70833.3	72386.1	70294.1	70757.3	866.1	140677	140162	130854	131320	131163	138037	131331	131026	131557
871.1	73757	76451.6	69164.6	69322.9	69260.4	70791.7	72070.9	70170.9	70657.4	866	140535	140369	130761	131235	131076	138255	131225	130928	131454
871.01	72876	76121.1	69092.9	69253.1	69189.9	70750.1	71783.8	70050.8	70557.6	865.9	141258	140596	130668	131151	130990	138492	131119	130831	131351
870.92	71245	75819.5	69020.6	69182.7	69118.9	70708.8	71520.4	69933.5	70458	865.8	141689	140846	130574	131067	130903	138750	131013	130734	131248
870.83	71913.5	75542.4	68947.1	69111.2	69046.8	70667.1	71276.9	69818.1	70358.1	865.7	142043	141118	130480	130983	130817	139030	130908	130636	131144
870.74	70264.5	75287.9	68874.3	69040.3	68975.2	70626.9	71051.4	69706.1	70259.4	865.6	142604	141416	130386	130899	130730	139334	130802	130539	131041
870.65	70042	75051.6	68800.3	68968.3	68902.6	70586.5	70839.9	69595.6	70160.2	865.5	142535	141739	130292	130815	130644	139662	130698	130441	130938
870.56	71553.5	74832.2	68726.1	68896.2	68829.8	70547	70641.3	69487.1	70061.7	865.4	143598	142090	130198	130732	130558	140016	130593	130344	130835
870.47	70987.5	74629.2	68653.2	68825.3	68758.2	70509.6	70455.1	69382.1	69964.9	865.3	144879	142469	130103	130648	130472	140398	130488	130246	130732
870.38	68742.5	74439.4	68579.9	68754.1	68686.2	70472.9	70278.5	69278.6	69868.5	865.2	145079	142879	130008	130564	130385	140808	130384	130148	130629
870.29	70006.5	74260.2	68505	68681.4	68612.8	70435.8	70108.9	69175.4	69771.1	865.1	145452	143320	129913	130481	130299	141250	130279	130050	130525
870.2	68041.5	74093.2	68431.1	68609.6	68540.4	70400.6	69948.1	69074.8	69675.1	865	145984	143794	129817	130398	130213	141722	130175	129952	130422
870.11	67329.5	73935	68355.8	68536.6	68466.6	70365.4	69792.7	68974.3	69578.5	864.9	146808	144302	129722	130314	130127	142228	130071	129853	130318
870.02	68713.5	73785.8	68280.1	68463.1	68392.4	70330.9	69643	68874.9	69481.9	864.8	147347	144847	129626	130231	130041	142768	129967	129755	130215
869.93	68571.5	73646.2	68205.4	68390.7	68319.2	70298.8	69499.8	68777.7	69386.9	864.7	147396	145428	129530	130148	129956	143344	129863	129656	130111
869.84	69168.5	73514.8	68130.6	68318.3	68246.1	70267.9	69361.6	68681.8	69292.4	864.6	147786	146048	129434	130066	129870	143957	129759	129558	130007
869.75	68279.5	73391.4	68056.4	68246.4	68173.4	70239.1	69228.2	68587.5	69198.8	864.5	148106	146708	129338	129984	129785	144608	129655	129459	129904
869.66	68150.5	73274.7	67981.6	68174.1	68100.2	70211	69098.4	68493.6	69105.1	864.4	148789	147408	129241	129902	129700	145299	129552	129360	129800
869.57	68178.5	73164.7	67906.6	68101.6	68027.1	70184.4	68972.3	68400.8	69011.8	864.3	149757	148150	129144	129820	129616	146030	129448	129261	129696
869.48	67312	73061.2	67831.9	68029.4	67953.9	70159.6	68849.6	68308.9	68919	864.2	151279	148933	129047	129739	129531	146801	129344	129162	129592
869.39	69357.5	72963.4	67756.5	67956.6	67880.4	70135.9	68729.6	68217.3	68826.1	864.1	151997	149759	128950	129658	129447	147613	129240	129062	129488
869.3	69734.5	72873	67682.6	67885.4	67808.3	70115.6	68613.8	68128.1	68735.1	864	152405	150628	128852	129576	129362	148467	129136	128962	129383
869.21	67931.5	72788.7	67609.1	67814.6	67736.6	70097.4	68501	68039.9	68644.9	863.9	153273	151539	128754	129496	129278	149361	129032	128862	129278
869.12	67903	72708.7	67534.4	67742.5	67663.7	70079.9	68389.3	67951.1	68553.8	863.8	155328	152493	128655	129415	129195	150297	128927	128761	129174
869.03	69292	72634.1	67459.6	67670.6	67590.9	70064.6	68279.9	67863.1	68463.1	863.7	156489	153487	128556	129335	129111	151271	128822	128660	129068
868.94	69598	72566	67385.9	67599.8	67519.1	70052.5	68173.6	67776.7	68373.9	863.6	156449	154522	128456	129255	129027	152283	128717	128559	128962
868.85	69996	72503.4	67312.5	67529.2	67447.8	70043.1	68069.4	67691.2	68285.2	863.5	157382	155593	128357	129175	128944	153331	128612	128457	128857
868.76	71131.5	72446.2	67239.4	67459.1	67376.8	70036.4	67967.4	67606.6	68197.2	863.4	158427	156699	128257	129096	128862	154411	128507	128355	128751
868.67	72546.5	72395.2	67167.2	67390	67306.6	70033.1	67867.8	67523.4	68110.4	863.3	159304	157836	128156	129017	128780	155521	128402	128253	128644
868.58	71737.5	72350.4	67096.1	67321.9	67237.6	70033.7	67770.8	67441.6	68025.1	863.2	159701	158998	128056	128939	128698	156654	128296	128151	128538
868.49	71458.5	72310.2	67024.4	67253.4	67168.2	70036.6	67674.6	67359.9	67939.6	863.1	160812	160180	127955	128862	128618	157805	128191	128048	128431
868.4	69831.5	72275.1	66952.6	67184.9	67098.6	70042.5	67579.6	67278.4	67854.1	863	161898	161375	127854	128785	128537	158966	128085	127945	128325
868.31	71376.5	72244.1	66879.7	67115.2	67028	70050.5	67484.7	67196.2	67767.9	862.9	162251	162573	127752	128708	128458	160129	127978	127842	128217
868.22	70426.5	72219.6	66807.9	67046.9	66958.6	70063.1	67392.1	67115.6	67683.1	862.8	162900	163767	127650	128633	128379	161284	127872	127739	128110
868.13	71049.5	72200.1	66735.5	66977.9	66888.6	70078.7	67299.9	67034.7	67597.9	862.7	164270	164943	127548	128558	128301	162419	127766	127635	128003
868.04	72206.5	72186.6	66663.6	66909.5	66819.1	70098.7	67209.1	66954.6	67513.6	862.6	164971	166089	127445	128484	128224	163522	127659	127531	127895
867.95	72402	72179.7	66592.6	66842.1	66750.6	70123.6	67120.2	66875.8	67430.3	862.5	165546	167190	127342	128411	128147	164578	127552	127427	127787
867.86	71244	72179	66521.8	66774.9	66682.4	70153.2	67032.3	66797.4	67347.6	862.4	166457	168233	127239	128339	128072	165572	127445	127322	127679
867.77	74223	72183.6	66450.1	66707.1	66613.5	70186.5	66944.4	66718.6	67264.2	862.3	167499	169202	127136	128268	127998	166488	127338	127217	127570
867.68	75545	72196.6	66380.8	66641.5	66546.8	70226.9	66859.6	66642.2	67183.4	862.2	168201	170079	127032	128198	127926	167310	127231	127112	127462
867.59	74441	72217.3	66312.3	66577	66481.2	70273.6	66776.4	66567.1	67103.7	862.1	167951	170850	126928	128130	127854	168023	127123	127007	127353
867.5	71988	72244.1	66243.1	66511.9	66414.9	70325	66693.1	66491.6	67023.6	862	168002	171500	126824	128063	127785	168610	127015	126902	127244
867.41	72817.5	72276.2	66172.3	66445.1	66346.9	70380.6	66608.8	66414.4	66941.9	861.9	168628	172016	126720	127998	127717	169060	126908	126796	127135
867.32	72310.5	72316.4	66102.1	66379.1	66279.8	70442.9	66525.6	66338.2	66861.1	861.8	169982	172386	126615	127934	127652	169359	126800	126690	127026
867.23	73019.5	72364.1	66031.5	66312.8	66212.3	70511.6	66442.8	66262	66780.2	861.7	170739	172602	126510	127872	127588	169500	126692	126584	126917
867.14	74413	72420.2	65961.6	66247.2	66145.4	70587.6	66361	66186.4	66700.1	861.6	170963	172659	126405	127812	127526	169478	126584	126478	126807
867.05	74569	72486.1	65892.6	66182.8	66079.8	70672.2	66280.8	66112.2	66621.3	861.5	171147	172556	126300	127753	127466	169290	126475	126372	126698
866.96	73694	72560.7	65823.9	66118.6	66014.4	70764.7	66201.2	66038.2	66542.8	861.4	171235	172294	126194	127697	127410	168939	126367	126265	126588
866.87	73265.5	72644.1	65754.5	66054	65948.4	70864.9	66121.4	65963.9	66463.9	861.3	170781	171880	126089	127644	127357	168429	126259	126159	126478
866.78	72911.5	72736.9	65684.9	65989.2	65882.4	70973.4	66041.9	65889.5	66384.9	861.2	170470	171324	125984	127593	127307	167770	126150	126052	126369
866.69	73697	72839.6	65615.1	65924.4	65816.2	71090.9	65962.5	65815.1	66305.9	861.1	170219	170635	125878	127546	127260	166973	126042	125946	126259
866.6	75134.5	72953.6	65545.9	65860.2	65750.8	71218.8	65884.1	65741.4	66227.8	861	170399	169830	125773	127501	127218	166052	125934	125840	126150
866.51	73985	73079.6	65477.8	65797.4	65686.4	71357.8	65807.1	65668.9	66150.8	860.9	170191	168923	125668	127460	127180	165021	125826	125733	126041
866.42	73464.5	73216.4	65408.9	65733.8	65621.5	71506.8	65729.8	65595.8	66073.2	860.8	169778	167930	125562	127422	127147	163895	125719	125627	125932
866.33	73094.5	73365.1	65339.7	65670.1	65556.4	71666.6	65652.4	65522.6	65995.6	860.7	168113	166870	125457	127389	127119	162693	125611	125521	125823
866.24	76524.5	73526.1	65270.2	65606.2	65491.1	71838.1	65575.1	65449.2	65917.8	860.6	166225	165757	125353	127360	127097	161430	125504	125416	125714
866.15	77287.5	73702.8	65203.3	65545.1	65428.4	72024.2	65500.6	65378.4	65842.7	860.5	164872	164611	125248	127336	127082	160121	125398	125310	125607
866.06	76286.5	73894	65137	65484.6	65366.6	72224.1	65427	65308.4	65768.4	860.4	163654	163444	125145	127318	127074	158780	125292	125206	125499
865.97	75411	74098.8	65070	65423.7	65304.1	72436.8	65353	65237.9	65693.5	860.3	161907	162271	125042	127305	127075	157420	125186	125102	125392
865.88	74674.5	74317.8	65002.4	65362.3	65241.2	72662.9	65278.7	65166.8	65618.1	860.2	160072	161106	124939	127298	127084	156052	125081	124998	125286
865.79	74773.5	74551.9	64934.4	65300.7	65177.9	72903.2	65204.1	65095.4	65542.6	860.1	158322	159958	124837	127298	127104	154687	124977	124896	125181
865.7	75879.5	74801.9	64866.4	65239.2	65115	73158.9	65129.8	65024.2	65467.2	860	157174	158840	124736	127306	127134	153334	124873	124793	125076
865.61	76985.5	75069.8	64799.4	65178.8	65053	73431.4	65056.6	64954	65392.8	859.9	156141	157759	124634	127321	127177	152000	124770	124691	124971
865.52	78427.5	75355.3	64733.2	65119.5	64992.1	73720.9	64984.5	64884.7	65319.3	859.8	154382	156724	124534	127344	127234	150689	124667	124590	124867
865.43	76385	75660	64667.9	65061.4	64932.3	74028.8	64913.7	64816.6	65247.1	859.7	153623	155743	124433	127377	127307	149408	124565	124489	124764
865.34	75726.5	75981.4	64601.4	65002.2	64871.3	74352.6	64841.6	64747.1	65173.6	859.6	153029	154822	124333	127419	127398	148160	124463	124388	124660
865.25	75420	76321.4	64534.3	64942.6	64810.2	74694.2	64769.2	64677.2	65099.8	859.5	152604	153969	124233	127472	127509	146949	124361	124287	124557
865.16	77545.5	76680.6	64467.2	64883.2	64748.9	75054.4	64696.9	64607.3	65025.8	859.4	151577	153190	124134	127537	127645	145776	124260	124187	124454
865.07	79643.5	77060.9	64401.6	64825.4	64689.6	75434.8	64626.3	64539.1	64953.7	859.3	151150	152491	124034	127614	127809	144642	124158	124087	124352
864.98	79976	77463.5	64337.6	64769.6	64631.8	75836.6	64557.4	64472.4	64883.2	859.2	151005	151881	123935	127705	128006	143550	124057	123987	124250
864.89	79608	77886.6	64273.8	64714.2	64574.7	76258.4	64489.1	64406.2	64813.1	859.1	150585	151366	123836	127812	128242	142499	123956	123887	124147
864.8	80949.5	78330.9	64209.8	64658.8	64517.6	76700.4	64420.6	64339.8	64742.8	859	150610	150956	123736	127936	128524	141491	123855	123787	124045
864.71	80032.5	78797.2	64146.8	64604.7	64461.6	77163.6	64353.2	64274.4	64673.7	858.9	149993	150662	123637	128079	128861	140523	123754	123687	123943
864.62	80572.5	79284.7	64083.2	64550.2	64405.3	77647.2	64285.3	64208.6	64604.1	858.8	150441	150494	123538	128243	129262	139596	123654	123587	123841
864.53	79826.5	79793.9	64020.1	64496.6	64349.8	78151.7	64218.1	64143.2	64535	858.7	150898	150465	123439	128431	129739	138710	123553	123488	123739
864.44	80530.5	80324.6	63956.4	64442.6	64293.9	78676.9	64150.4	64077.3	64465.6	858.6	151464	150591	123339	128646	130304	137863	123452	123388	123637
864.35	81199.5	80877.5	63893.3	64389.6	64238.9	79223.4	64083.5	64012.1	64396.7	858.5	152697	150888	123240	128891	130970	137054	123351	123287	123534
864.26	81750	81451.6	63830.8	64337.3	64184.8	79790.2	64017.2	63947.4	64328.5	858.4	152921	151373	123140	129170	131753	136282	123249	123186	123431
864.17	79943	82047.6	63768.6	64285.8	64131.3	80378	63951.4	63883.3	64260.8	858.3	153466	152068	123039	129490	132669	135545	123148	123086	123328
864.08	82495.5	82662	63705.2	64233.4	64077	80983.4	63884.5	63817.9	64192	858.2	154997	152993	122939	129856	133733	134844	123046	122985	123225
863.99	84238	83298.2	63643.8	64183.2	64024.8	81609.6	63819.6	63754.6	64125.1	858.1	156045	154171	122838	130276	134961	134175	122943	122883	123122
863.9	85520	83953.6	63583.6	64134.8	63974.3	82254.1	63756	63692.4	64059.7	858	156376	155623	122736	130761	136368	133537	122840	122781	123018
863.81	85860.5	84627.5	63524.3	64087.6	63925.2	82916.1	63693.5	63631.4	63995.2	857.9	157975	157374	122635	131323	137965	132930	122738	122679	122914
863.72	84375	85317.1	63465.3	64041.2	63876.8	83592.6	63631.4	63570.7	63931.2	857.8	160417	159446	122533	131977	139761	132352	122634	122576	122809
863.63	86444.5	86018.5	63405.3	63994.1	63827.7	84280.1	63568.3	63508.9	63866.2	857.7	162797	161852	122430	132740	141755	131800	122530	122473	122704
863.54	87423.5	86733	63346.9	63948.9	63780.6	84979.5	63506.9	63448.8	63802.8	857.6	164669	164609	122326	133636	143938	131274	122424	122368	122597
863.45	86698.5	87456	63289.2	63905.1	63734.7	85686.3	63446.3	63389.4	63740.2	857.5	166903	167711	122221	134690	146284	130772	122319	122264	122490
863.36	90617	88184.1	63231	63861.2	63688.8	86397	63385.3	63329.7	63677.2	857.4	169237	171143	122116	135934	148744	130293	122212	122158	122382
863.27	88298.5	88915.9	63175.7	63820.6	63646.3	87110.2	63327.2	63272.8	63617.2	857.3	172146	174863	122010	137404	151244	129835	122105	122051	122274
863.18	88307	89643.8	63118.8	63778.9	63602.7	87818.4	63267.6	63214.2	63555.6	857.2	175007	178794	121903	139138	153669	129397	121996	121943	122164
863.09	89347	90363.8	63061.8	63737.9	63559.7	88517.2	63208.1	63155.8	63494.1	857.1	178174	182834	121794	141182	155872	128977	121887	121835	122054
863	91105.5	91072.6	63005.7	63698.2	63518.2	89203.6	63149.4	63098.3	63433.4	857	181163	186848	121685	143580	157676	128575	121776	121725	121942
862.91	94228.5	91764.6	62950.9	63660.4	63478.5	89871.8	63092.1	63042.1	63374.2	856.9	185648	190711	121575	146380	158907	128189	121665	121614	121830
862.82	93087.5	92434.4	62898.3	63625.6	63441.8	90516.2	63037.2	62988.1	63317.3	856.8	190455	194327	121463	149632	159423	127817	121552	121501	121715
862.73	92159.5	93073.7	62845.1	63590.6	63405.1	91128.6	62981.5	62933.4	63259.7	856.7	194673	197660	121349	153372	159150	127459	121437	121387	121600
862.64	94481.5	93675.1	62791.1	63555.7	63368.4	91701.4	62925.2	62878.2	63201.6	856.6	198262	200765	121234	157638	158108	127113	121321	121272	121482
862.55	93266	94235.2	62738.8	63523.2	63334.3	92231.4	62870.8	62824.6	63145.2	856.5	202334	203757	121117	162441	156401	126780	121203	121155	121364
862.46	92315.5	94744.2	62685.8	63490.7	63300.2	92708.5	62815.6	62770.2	63087.9	856.4	206191	206788	120999	167775	154189	126457	121084	121036	121244
862.37	94472	95196.8	62632.1	63458.3	63266.4	93127.2	62759.7	62715.3	63030.2	856.3	210456	209987	120880	173591	151650	126144	120964	120917	121122
862.28	95380	95588.5	62579.9	63428.3	63235.2	93483.1	62705.5	62661.9	62974.1	856.2	214613	213402	120759	179769	148952	125840	120842	120796	121000
862.19	96142.5	95913.6	62528.5	63400.1	63205.7	93770.3	62652.1	62609.3	62918.8	856.1	217527	216970	120637	186116	146228	125545	120719	120673	120875
862.1	96302.5	96167.2	62477.7	63373.2	63177.9	93983.8	62599.2	62557.3	62864	856	220378	220474	120514	192313	143578	125258	120595	120549	120750
862.01	96580	96345.1	62426.9	63347.6	63151.4	94119.2	62546.6	62505.4	62809.5	855.9	223675	223552	120390	197938	141065	124978	120470	120425	120624
861.92	94770	96444.9	62376.5	63323.3	63126.4	94174.2	62494.2	62453.8	62755.3	855.8	224625	225729	120264	202479	138726	124705	120343	120299	120496
861.83	95820.5	96463.7	62324.8	63298.8	63101.5	94145.6	62440.7	62401.1	62699.8	855.7	225208	226506	120138	205417	136583	124440	120216	120172	120368
861.74	93824	96403.3	62273.8	63276.3	63078.8	94035	62387.9	62349.1	62645.3	855.6	226060	225496	120012	206362	134638	124180	120089	120046	120240
861.65	93084	96262.6	62221.4	63253.6	63056.3	93841.2	62333.8	62295.7	62589.3	855.5	224853	222549	119886	205165	132891	123928	119962	119919	120112
861.56	95633.5	96044.9	62168.7	63231.8	63035	93567.2	62279.3	62241.8	62533	855.4	222936	217803	119760	201977	131330	123681	119835	119793	119984
861.47	95441	95755.7	62117.7	63213.2	63017.3	93218.4	62226.7	62189.8	62478.6	855.3	219700	211631	119634	197186	129942	123441	119709	119667	119857
861.38	96282.5	95397.8	62066.6	63196.1	63001.5	92797.6	62173.9	62137.8	62424	855.2	214814	204543	119510	191313	128715	123207	119584	119542	119731
861.29	96470	94976.9	62016.2	63181.2	62988.4	92309.8	62121.9	62086.4	62370.2	855.1	209531	197027	119387	184866	127631	122979	119460	119419	119606
861.2	93845.5	94498.9	61965.9	63168.1	62977.7	91760.9	62070.1	62035.2	62316.6	855	203575	189504	119266	178280	126676	122758	119338	119298	119484
861.11	92031	93967.9	61913.8	63155	62967.6	91154.6	62016.5	61982.2	62261.2	854.9	196371	182264	119147	171862	125834	122543	119219	119179	119363
861.02	91603	93391.8	61860.4	63142.5	62958.8	90498.8	61961.6	61927.9	62204.6	854.8	188774	175489	119030	165809	125090	122335	119101	119062	119245
860.93	94703.5	92777.9	61806.8	63131.8	62952.6	89800.1	61906.5	61873.3	62147.8	854.7	180473	169289	118917	160244	124432	122133	118987	118948	119129
860.84	94315	92136.6	61755.4	63125.6	62951.7	89068.6	61853.7	61821.1	62093.2	854.6	173174	163694	118805	155210	123847	121937	118875	118836	119016
860.75	93123.5	91471.4	61703.8	63121.3	62954	88307.4	61800.7	61768.7	62038.5	854.5	165637	158710	118697	150722	123326	121747	118765	118727	118906
860.66	92287.5	90788.9	61651.4	63118.8	62959.2	87522.7	61746.9	61715.4	61983	854.4	157401	154307	118591	146762	122858	121563	118658	118621	118798
860.57	90663.5	90095.9	61598.4	63118.3	62967.7	86720.9	61692.6	61661.6	61926.9	854.3	151194	150443	118487	143295	122435	121385	118554	118517	118693
860.48	90942	89397.2	61544.3	63119.7	62979.4	85906	61637.1	61606.7	61869.8	854.2	145774	147073	118386	140282	122052	121211	118452	118416	118590
860.39	90589	88700.5	61490.4	63124.2	62996.2	85085.2	61581.9	61551.9	61813	854.1	140091	144141	118287	137674	121700	121042	118352	118316	118489
860.3	89338	88009.6	61436.3	63131.8	63018.2	84261.6	61526.6	61497.1	61756	854	136649	141598	118189	135425	121378	120878	118254	118218	118390
860.21	88167.5	87329.7	61381.3	63142.1	63044.9	83439.6	61470.4	61441.3	61698.2	853.9	133536	139391	118093	133488	121079	120717	118157	118122	118292
860.12	87501	86664.2	61325.6	63155.4	63077.4	82621.6	61413.4	61384.8	61639.6	853.8	130441	137471	117998	131816	120800	120560	118061	118026	118196
860.03	87524.5	86018.5	61269.4	63172.3	63116.6	81812.1	61356.1	61327.9	61580.6	853.7	127845	135798	117903	130373	120539	120405	117966	117931	118100
859.94	84959.5	85396	61213.2	63193.7	63163.9	81013.3	61298.8	61271.1	61521.7	853.6	125706	134333	117810	129120	120294	120254	117872	117838	118005
859.85	83983.5	84798.9	61155.3	63218.1	63218.4	80225.9	61239.7	61212.4	61461	853.5	124059	133044	117717	128028	120062	120105	117779	117745	117911
859.76	84980	84231.9	61096.8	63246.9	63282.4	79453.5	61179.9	61153.1	61399.8	853.4	123022	131901	117625	127070	119842	119959	117686	117652	117817
859.67	83657.5	83699.4	61038.9	63282.2	63358.8	78698.1	61121	61094.6	61339.2	853.3	122259	130881	117533	126222	119632	119815	117594	117560	117724
859.58	83047.5	83203.6	60980.2	63322.4	63447.4	77960.1	61061.2	61035.2	61277.8	853.2	121947	129965	117441	125467	119432	119673	117501	117468	117631
859.49	81736.5	82747.9	60921	63369.1	63551.1	77240.2	61000.9	60975.3	61216.1	853.1	121747	129135	117350	124788	119240	119532	117409	117376	117538
859.4	81224	82336.2	60860.9	63421.9	63671.4	76539.5	60939.9	60914.7	61153.6	853	121645	128379	117258	124176	119056	119393	117317	117285	117445
859.31	81911	81972.6	60800.6	63482.3	63812.1	75858.2	60878.5	60853.7	61090.7	852.9	120799	127686	117167	123617	118877	119256	117225	117193	117352
859.22	80432	81662.8	60740.7	63551.9	63977.3	75197.9	60817.7	60793.2	61028.3	852.8	120071	127048	117076	123106	118706	119120	117133	117102	117259
859.13	81322.5	81410.4	60679.8	63629.8	64169.6	74557.9	60755.8	60731.8	60965	852.7	119623	126457	116985	122636	118540	118986	117042	117010	117167
859.04	82513	81222.7	60619.7	63718.8	64395.4	73938.9	60694.7	60670.9	60902.4	852.6	119377	125907	116894	122200	118378	118853	116950	116919	117075
858.95	81262.5	81106.6	60560.4	63820	64660.6	73341.9	60634.5	60611.1	60840.8	852.5	118928	125394	116803	121795	118222	118722	116859	116828	116983
858.86	81649.5	81067.9	60500.3	63933.1	64969.9	72764.4	60573.4	60550.4	60778.2	852.4	118135	124914	116712	121417	118070	118592	116768	116737	116890
858.77	82808.5	81116.1	60440.5	64060.3	65331.6	72207.9	60512.8	60490	60716.1	852.3	117955	124462	116622	121064	117922	118464	116676	116646	116799
858.68	82889	81261.4	60381.6	64204.2	65754.7	71672	60452.9	60430.5	60654.8	852.2	117208	124037	116531	120731	117778	118336	116586	116556	116707
858.59	84790	81513.1	60322.7	64365.5	66246.9	71156.2	60393.2	60371.1	60593.8	852.1	116407	123635	116441	120418	117637	118210	116495	116465	116616
858.5	84301	81884.4	60265.3	64548	66819.8	70660.9	60334.9	60313.2	60534.1	852	116096	123254	116351	120122	117499	118085	116404	116375	116524
858.41	83770	82385.7	60207.6	64752.5	67481.4	70184.2	60276.3	60254.9	60474.2	851.9	115392	122893	116261	119841	117364	117962	116314	116285	116433
858.32	84272	83029.4	60149.5	64981.8	68241.6	69725.8	60217.4	60196.3	60413.8	851.8	115739	122549	116171	119574	117232	117839	116224	116195	116342
858.23	85455.5	83830.9	60091.8	65240.9	69112.4	69285.4	60159	60138.1	60354	851.7	116332	122222	116082	119320	117102	117717	116133	116105	116251
858.14	85739.5	84802.9	60035.1	65534.4	70102.9	68863.4	60101.4	60080.8	60295.1	851.6	116089	121908	115991	119078	116974	117596	116043	116015	116160
858.05	88561.5	85959.8	59978.5	65867.6	71222.1	68458.1	60044.1	60023.8	60236.4	851.5	115617	121608	115901	118845	116848	117476	115952	115924	116069
857.96	89235	87314.1	59924.1	66248.4	72476.9	68071.4	59988.8	59968.8	60179.9	851.4	115579	121320	115812	118622	116724	117357	115862	115834	115978
857.87	91823	88876.8	59870.1	66683.8	73870.4	67700.6	59934.2	59914.4	60123.9	851.3	115675	121043	115722	118408	116602	117238	115772	115744	115886
857.78	92851.5	90654	59818.1	67184.1	75400.2	67346.8	59881.3	59861.8	60069.8	851.2	115966	120777	115632	118202	116482	117120	115681	115654	115795
857.69	93904	92648.6	59766.8	67760.4	77057.9	67008	59829.3	59810.1	60016.5	851.1	116750	120520	115541	118003	116363	117003	115590	115564	115704
857.6	94146	94851.9	59716.3	68425.6	78822.4	66683.9	59778.2	59759.2	59964.1	851	116156	120272	115451	117810	116245	116886	115500	115473	115613
857.51	95233	97242.1	59666	69194.2	80657.1	66373.4	59727.2	59708.4	59911.8	850.9	115543	120032	115361	117624	116129	116771	115409	115383	115521
857.42	97224	99786.6	59616.6	70085.5	82511.6	66076.2	59677.1	59658.6	59860.4	850.8	114991	119800	115271	117444	116014	116656	115318	115292	115430
857.33	100724	102427	59568.6	71118.9	84308.9	65792.8	59628.4	59610.2	59810.5	850.7	114645	119575	115181	117268	115900	116541	115228	115202	115339
857.24	102544	105092	59523.2	72318.8	85955.8	65523.2	59582.3	59564.2	59763.2	850.6	115091	119357	115091	117098	115788	116428	115138	115112	115248
857.15	106936	107687	59479.1	73706	87336	65266.2	59537.5	59519.8	59717.2	850.5	115416
857.06	109916	110129	59438.2	75309.2	88338.9	65022.6	59495.9	59478.4	59674.4
856.97	111438	112342	59399.4	77152.1	88865.6	64791.2	59456.6	59439.2	59633.8
856.88	113452	114291	59361.8	79257.1	88858.3	64570.3	59418.3	59401.2	59594.4
856.79	117446	116000	59325.7	81650.8	88314.3	64359.9	59381.6	59364.7	59556.5
856.7	118031	117537	59292.3	84350.8	87287.1	64160.9	59347.7	59331.1	59521.4
856.61	121888	119009	59259.6	87371.9	85866	63970.3	59314.3	59297.8	59486.9
856.52	122230	120533	59229.6	90715.7	84168.9	63790.2	59283.7	59267.4	59455.2
856.43	124436	122210	59199.8	94372.6	82304.6	63617.4	59253.4	59237.3	59423.7
856.34	127857	124103	59171.7	98304.7	80376	63453.1	59224.7	59208.8	59393.9
856.25	130670	126226	59146	102452	78459.1	63297.6	59198.4	59182.8	59366.6
856.16	134308	128524	59122.4	106700	76610.6	63150.1	59174.3	59158.8	59341.2
856.07	135546	130868	59101.4	110886	74868.8	63011.1	59152.8	59137.4	59318.7
855.98	133185	133061	59081.3	114792	73251.1	62878.2	59132.2	59117	59296.9
855.89	131682	134840	59059.6	118143	71767.5	62748.8	59109.8	59094.9	59273.6
855.8	132209	135928	59036.7	120662	70419.3	62623.1	59086.5	59071.8	59249.2
855.71	132370	136071	59014.2	122095	69207.1	62502.3	59063.6	59048.9	59225.2
855.62	132927	135103	58991.9	122286	68123.1	62385.8	59040.8	59026.3	59201.3
855.53	133382	132995	58970.1	121211	67160.4	62273.8	59018.3	59004.1	59177.9
855.44	130425	129850	58948.5	118985	66308.3	62165.9	58996.3	58982.2	59154.8
855.35	127394	125882	58924.8	115832	65554.7	62059.4	58972.2	58958.2	59129.7
855.26	122902	121363	58899.1	112034	64889.6	61954.2	58945.9	58932.1	59102.3
855.17	120978	116554	58870	107863	64300.8	61848.8	58916.4	58902.8	59071.9
855.08	116358	111689	58839.6	103563	63781.4	61745.2	58885.6	58872.1	59040.1
854.99	110396	106935	58805.9	99309.1	63319.7	61640.9	58851.4	58838.1	59004.9
854.9	105863	102413	58768	95231.9	62907.1	61535.2	58813.1	58799.9	58965.6
854.81	103177	98191	58726.8	91406.9	62536.7	61428.8	58771.4	58758.4	58923
854.72	100271	94311.1	58683.8	87882.1	62203.5	61322.8	58727.9	58715.1	58878.6
854.63	95162.5	90787.8	58638.6	84677.8	61901.9	61217.1	58682.4	58669.7	58832.1
854.54	90226.5	87610.4	58589.8	81788.9	61625.2	61109.8	58633.2	58620.6	58781.9
854.45	88702	84768.6	58537.6	79209	61369.5	61001.1	58580.5	58568.1	58728.3
854.36	84497	82239.4	58484.2	76919	61133.6	60893.2	58526.8	58514.4	58673.6
854.27	79518.5	79999	58427.9	74897.8	60912.7	60784.3	58470.1	58457.8	58616
854.18	75866.5	78016.8	58368.1	73117.6	60703.7	60673.6	58409.8	58397.8	58554.8
854.09	76073	76268.6	58305.7	71556.1	60505.8	60561.9	58347	58335.1	58491.1
854	74048.5	74728	58243.4	70189	60319.6	60452	58284.3	58272.6	58427.6
853.91	70724	73368.9	58179.8	68991.5	60142.4	60342.2	58220.3	58208.7	58362.7
853.82	72621	72167.3	58113.8	67940.7	59972.1	60231.5	58153.9	58142.4	58295.4
853.73	70610	71103.6	58049.2	67018.4	59811.2	60123.6	58089	58077.6	58229.7
853.64	68871.5	70156.9	57983.2	66204.6	59656.3	60015.7	58022.7	58011.4	58162.4
853.55	67377	69309.4	57916.1	65482.1	59506.7	59907.8	57955.2	57943.9	58094.1
853.46	65591.5	68547.4	57847.8	64837.9	59361.9	59800.1	57886.6	57875.5	58024.7
853.37	63686.5	67857.3	57778.4	64259.2	59221.2	59692.3	57816.8	57805.8	57954
853.28	61306	67229	57707.7	63736.2	59084	59584.3	57745.7	57734.8	57882.1
853.19	61985	66652.5	57635.2	63259.7	58949.6	59475.8	57672.9	57662.2	57808.5
853.1	61418.5	66122.9	57563.3	62824.9	58819.8	59368.8	57600.8	57590.1	57735.4
853.01	61225	65633.4	57491.1	62425.5	58693.2	59262.3	57528.2	57517.7	57662.1
852.92	60690	65178.4	57418.8	62056.3	58570	59156.8	57455.5	57445.1	57588.7
852.83	59012.5	64753.9	57346.2	61713.6	58449.6	59051.9	57382.6	57372.2	57514.8
852.74	60648	64355.2	57272.3	61392.7	58330.9	58946.8	57308.4	57298.2	57439.9
852.65	58479.5	63981.8	57199.8	61093.7	58216.1	58843.6	57235.6	57225.4	57366.3
852.56	58694	63628.2	57125.7	60811.2	58102.2	58739.8	57161.2	57151.2	57291.1
852.47	58181.5	63293.9	57051.8	60545.2	57990.8	58636.9	57086.9	57077.1	57216.2
852.38	58408.5	62977	56977.7	60293.4	57881.1	58534.6	57012.5	57002.7	57140.9
852.29	58419	62675.9	56903.7	60054.8	57773.7	58433.2	56938.2	56928.5	57065.9
852.2	56523	62389.2	56829.8	59828.2	57668.1	58332.6	56864	56854.4	56990.9
852.11	55820	62114.2	56754.6	59610.8	57562.8	58231.2	56788.5	56778.9	56914.7
852.02	56962	61850.9	56678.8	59402.7	57458.7	58130.2	56712.6	56703.1	56838
851.93	58358.5	61599.2	56604.1	59204.3	57356.9	58030.7	56637.4	56628.1	56762.2
851.84	60004	61358.9	56530.3	59015.2	57257.6	57932.8	56563.4	56554.2	56687.4
851.75	57774.5	61128.9	56457.8	58834.6	57160.7	57836.7	56490.7	56481.5	56613.9
851.66	57088	60906	56383.8	58659.2	57063.4	57739.7	56416.3	56407.2	56538.8
851.57	57203.5	60690.7	56309.2	58489.8	56966.9	57642.8	56341.6	56332.6	56463.4
851.48	56770.5	60482.7	56234.9	58326.1	56871.6	57546.6	56266.9	56258.1	56388.1
851.39	58158.5	60281.4	56160.3	58167.6	56776.9	57450.6	56192.1	56183.2	56312.5
851.3	57861.5	60087.4	56086.8	58014.9	56684.2	57356.2	56118.2	56109.5	56238
851.21	55377.5	59899.2	56013	57866.7	56592.3	57262.2	56044.2	56035.6	56163.3
851.12	56512	59714.8	55937.6	57720.8	56499.4	57166.8	55968.6	55959.9	56086.9
851.03	57244.5	59536.3	55862.9	57579.8	56408.2	57072.8	55893.7	55885.2	56011.4
850.94	57065.5	59363.2	55788.9	57442.9	56318.3	56979.9	55819.4	55811	55936.5
850.85	57537	59194.6	55714.8	57309.3	56228.9	56887.3	55745.2	55736.8	55861.5
850.76	56636	59030.6	55641.2	57179.2	56140.7	56795.5	55671.2	55662.9	55786.9
850.67	56529	58869.8	55566.9	57051.4	56052.4	56703.6	55596.7	55588.4	55711.8
850.58	58452	58712.8	55492.6	56926.4	55964.7	56611.9	55522.1	55514	55636.6
850.49	58043.5	58560.6	55419.7	56805.3	55878.9	56522.2	55449	55440.9	55562.8
850.4	56602	58411.5	55346.6	56686.3	55793.4	56432.5	55375.7	55367.7	55488.8
850.31	55272.5	58264.5	55272.5	56568.6	55707.5	56342.2	55301.3	55293.4	55413.8

## Sheet: Fig. 3b
	Fe foil	Fe2O3	NiFe-SQ/NF-R	NiFe-LDH/NF-R
x	y	y	y	y
6913.54	0.000171078	0.00443	0.00877	0.00112
6918.54	0.00168	0.00416	0.0082	0.000905541
6923.61	0.00153	0.00103	0.00755	-0.000541572
6928.55	0.00136	0.00146	0.00694	0.00211
6933.61	0.00125	0.000538822	0.00644	0.000616559
6938.61	0.00112	0.000881754	0.00589	-0.00185
6943.57	0.000982427	0.000572561	0.00529	0.000179714
6948.59	0.000870447	0.000736706	0.00469	-0.00061236
6953.57	0.000738492	0.000143795	0.00426	-4.80468e-05
6958.55	0.00062098	0.000485999	0.00389	0.00113
6963.55	0.000529152	0.000454958	0.00335	0.000474518
6968.58	0.00041957	-0.000331682	0.00285	0.00389
6973.6	0.000305046	-0.000156008	0.00236	-0.00152
6978.59	0.000216929	-0.000896525	0.00205	-0.000362797
6983.55	0.000124266	-0.000861733	0.00167	-0.00225
6988.58	4.68401e-05	-0.000103913	0.00124	-0.00144
6993.59	-3.22623e-05	-0.000869052	0.00083637	-0.000185918
6998.61	-8.42408e-05	-0.00207	0.000474527	-0.000429737
7003.62	-0.000144141	-0.000575058	0.000277502	0.000131524
7008.63	-0.000216392	-0.0016	-3.40436e-05	0.000401079
7013.61	-0.000266752	-0.000979678	-0.000340604	-0.00181
7018.61	-0.000323272	-0.00114	-0.00066866	-0.00233
7023.61	-0.000347001	-0.00103	-0.00088891	0.000235438
7028.61	-0.000360822	-0.00176	-0.000944254	-0.000293783
7033.55	-0.00039091	-0.00174	-0.00119	0.00114
7038.62	-0.000355096	-0.0018	-0.00142	0.000568828
7043.55	-0.000362614	-0.00179	-0.00163	-0.00109
7048.61	-0.000335583	-0.00223	-0.00178	2.68191e-05
7053.61	-0.000262609	-0.00186	-0.00168	0.000605607
7058.54	-0.000181681	-0.0014	-0.00166	-0.000194993
7063.59	-3.60263e-05	-0.000779831	-0.0017	0.000626517
7068.58	0.000113567	-0.00108	-0.00164	0.000318845
7073.58	0.000322996	-0.000504882	-0.00156	0.000277688
7078.55	0.000615711	-7.14651e-05	-0.00126	0.000798338
7083.55	0.00101	-0.000500888	-0.000738727	-0.000549806
7088.59	0.00153	-0.000154222	-0.000256924	0.00116
7093.57	0.00226	-0.000186404	0.000340904	0.00646
7093.99	0.00205	0.00137	0.000535834	0.00313
7094.5	0.00219	0.00213	0.000718877	0.00398
7094.99	0.00234	0.00239	0.000789376	0.004
7095.5	0.0025	0.00341	0.000845076	0.00528
7095.99	0.00271	0.00233	0.000955372	0.00454
7096.5	0.00291	0.00425	0.00112	0.00398
7097	0.0031	0.00395	0.00114	0.00609
7097.51	0.00331	0.00366	0.00124	0.00621
7098.01	0.00353	0.00346	0.00147	0.00779
7098.51	0.00378	0.00283	0.00173	0.00702
7099.02	0.00401	0.00292	0.00192	0.008
7099.5	0.00429	0.00224	0.00202	0.00859
7100	0.00458	0.00181	0.00216	0.00599
7100.5	0.00489	0.00292	0.00238	0.0075
7101	0.00524	0.0018	0.00253	0.00892
7101.5	0.00556	0.00263	0.00262	0.00726
7102	0.00599	0.00176	0.00288	0.01225
7102.5	0.00645	0.00352	0.00318	0.00809
7103	0.00692	0.00349	0.0035	0.00947
7103.5	0.00744	0.00417	0.00376	0.01139
7104	0.00807	0.00621	0.00397	0.00862
7104.49	0.00878	0.00481	0.00424	0.00827
7105	0.00952	0.00502	0.00458	0.00976
7105.51	0.01041	0.00599	0.00492	0.01033
7106	0.01145	0.00672	0.00525	0.01113
7106.5	0.01259	0.00628	0.00568	0.01111
7107	0.014	0.00767	0.00613	0.01183
7107.5	0.0157	0.00689	0.00659	0.01376
7108	0.01784	0.00822	0.00714	0.01198
7108.5	0.02062	0.0087	0.00776	0.01199
7109	0.02456	0.01059	0.00842	0.01202
7109.48	0.03031	0.01023	0.0092	0.01438
7109.99	0.0395	0.01244	0.01034	0.01629
7110.5	0.05598	0.01311	0.01169	0.01686
7110.99	0.08271	0.01546	0.01301	0.01872
7111.5	0.11785	0.01875	0.01495	0.02075
7112	0.16016	0.02506	0.01877	0.02472
7112.49	0.20076	0.03343	0.02741	0.02955
7113	0.23516	0.04696	0.04073	0.03795
7113.51	0.26364	0.05949	0.05106	0.04684
7114	0.28754	0.06919	0.06028	0.05455
7114.5	0.30652	0.07226	0.06703	0.05838
7115	0.32179	0.06829	0.06429	0.05747
7115.51	0.33278	0.06442	0.06068	0.05765
7116	0.34083	0.05944	0.05913	0.05426
7116.49	0.34778	0.05769	0.05955	0.05063
7117	0.35725	0.05855	0.06192	0.05303
7117.49	0.37239	0.06195	0.06436	0.05288
7117.99	0.39364	0.06689	0.06615	0.05611
7118.5	0.42157	0.07333	0.06922	0.06326
7118.99	0.45498	0.08319	0.07455	0.06884
7119.48	0.48893	0.09724	0.08059	0.07813
7119.98	0.52568	0.11398	0.08856	0.09072
7120.48	0.56379	0.13856	0.10366	0.10711
7120.98	0.60171	0.16955	0.13021	0.12758
7121.49	0.6372	0.20838	0.16686	0.15721
7122	0.67077	0.25459	0.21051	0.18969
7122.5	0.7	0.30607	0.27489	0.23501
7123	0.72501	0.36177	0.36595	0.28759
7123.51	0.7467	0.41284	0.43209	0.34622
7124.01	0.76562	0.4679	0.4777	0.40155
7124.5	0.78312	0.52418	0.52405	0.46078
7125	0.79861	0.57847	0.58688	0.52928
7125.5	0.81367	0.64105	0.66386	0.59545
7125.99	0.82827	0.70333	0.73944	0.65711
7126.49	0.84301	0.77841	0.82111	0.72913
7127	0.8588	0.8519	0.9309	0.80274
7127.49	0.87675	0.92495	1.02604	0.87724
7127.99	0.89569	0.99377	1.08611	0.95536
7128.49	0.91654	1.06476	1.13726	1.03999
7128.99	0.93879	1.12558	1.20026	1.10741
7129.48	0.96075	1.17733	1.26633	1.18102
7129.99	0.98058	1.22729	1.30898	1.24135
7130.49	0.99665	1.2594	1.32989	1.2954
7131	1.00587	1.29343	1.34584	1.33875
7131.5	1.00704	1.31845	1.37213	1.37935
7132	1.00028	1.33159	1.40161	1.40565
7132.5	0.98729	1.33595	1.42467	1.41907
7133	0.97061	1.32978	1.44594	1.42544
7133.5	0.95307	1.31704	1.46425	1.42511
7134	0.93612	1.30203	1.46399	1.40286
7134.49	0.92041	1.27852	1.4452	1.38214
7134.99	0.90773	1.25546	1.41857	1.34431
7135.5	0.89797	1.23931	1.37787	1.31122
7135.99	0.89078	1.22409	1.33447	1.28566
7136.49	0.88661	1.21173	1.31118	1.25736
7136.99	0.885	1.19984	1.29556	1.24708
7137.5	0.8859	1.19711	1.2806	1.2253
7137.99	0.889	1.18918	1.26242	1.21927
7138.49	0.89368	1.17542	1.24286	1.20333
7139	0.89971	1.15852	1.22334	1.19427
7139.5	0.90636	1.15389	1.20232	1.17939
7140	0.91299	1.14065	1.17345	1.16518
7140.5	0.91859	1.13021	1.14587	1.15625
7141.01	0.92312	1.11665	1.12944	1.13632
7141.49	0.92594	1.1075	1.11427	1.12424
7142	0.92717	1.09388	1.0952	1.11216
7142.5	0.92704	1.0858	1.07308	1.10024
7143	0.92589	1.07582	1.05573	1.09135
7143.49	0.9243	1.06807	1.04405	1.07846
7144.49	0.92343	1.06299	1.02826	1.07159
7145.5	0.92305	1.05676	1.02816	1.06346
7146.5	0.92832	1.04841	1.03362	1.04556
7147.5	0.93988	1.04721	1.03728	1.03544
7148.51	0.9555	1.02356	1.02787	1.01722
7149.52	0.9717	1.00833	1.00493	0.99173
7150.52	0.98395	0.98281	0.98445	0.97056
7151.51	0.9926	0.95695	0.95472	0.94572
7152.51	0.99866	0.9388	0.93294	0.92002
7153.5	1.00329	0.91808	0.91165	0.9004
7154.51	1.00559	0.90222	0.89898	0.88411
7155.5	1.0049	0.88567	0.88159	0.86055
7156.51	1.00239	0.87239	0.86422	0.85079
7157.52	0.99939	0.85998	0.84667	0.83647
7158.52	0.99757	0.85041	0.83482	0.82898
7159.5	0.9971	0.84306	0.82659	0.82068
7160.51	0.99735	0.8412	0.82112	0.81157
7161.49	0.9971	0.83832	0.82041	0.80831
7162.5	0.99587	0.83631	0.82324	0.81011
7163.51	0.99351	0.84095	0.82757	0.81325
7164.51	0.99042	0.84627	0.83519	0.81919
7165.52	0.98753	0.85083	0.84324	0.82739
7166.52	0.98513	0.8585	0.85282	0.84199
7167.52	0.98335	0.86963	0.86036	0.85066
7168.52	0.98204	0.88108	0.87154	0.86603
7169.51	0.9803	0.90035	0.88568	0.88779
7170.51	0.9779	0.91216	0.90352	0.89897
7171.5	0.97447	0.92538	0.92183	0.91826
7172.5	0.96939	0.94352	0.94144	0.93193
7173.51	0.96288	0.95651	0.96799	0.95002
7174.52	0.95491	0.97605	0.99307	0.96933
7175.52	0.94625	0.99136	1.01692	0.98178
7176.52	0.93719	1.00343	1.02978	1.00335
7177.51	0.92834	1.01112	1.04281	1.01927
7178.51	0.92076	1.02264	1.05175	1.03089
7179.5	0.91492	1.03036	1.05916	1.03099
7180.51	0.91169	1.02938	1.06348	1.04183
7181.51	0.91089	1.04017	1.06665	1.04786
7182.51	0.91217	1.03988	1.06805	1.04795
7183.52	0.91485	1.03632	1.06762	1.05342
7184.53	0.91872	1.03516	1.06612	1.0539
7185.52	0.92414	1.03498	1.06469	1.05365
7186.51	0.93127	1.03506	1.06222	1.04573
7187.51	0.93963	1.03425	1.06032	1.04451
7188.52	0.94887	1.03403	1.05811	1.04617
7189.51	0.95843	1.03436	1.05732	1.04307
7190.51	0.96813	1.03325	1.05542	1.03975
7191.53	0.97831	1.02998	1.05311	1.03214
7192.53	0.98845	1.02811	1.04939	1.03272
7193.52	0.99701	1.02204	1.0461	1.03031
7194.53	1.00281	1.02337	1.0421	1.02622
7195.52	1.00491	1.01983	1.03673	1.02651
7196.52	1.00352	1.01482	1.03183	1.02374
7197.51	0.99915	1.01845	1.02677	1.01699
7198.52	0.99279	1.01666	1.02353	1.01759
7199.52	0.98466	1.00973	1.01828	1.01645
7200.52	0.97562	1.01128	1.0135	1.01486
7201.53	0.96562	1.00728	1.00713	1.01188
7202.52	0.95537	1.00976	1.00303	1.00986
7203.52	0.94451	1.00302	0.99724	1.00896
7204.51	0.93409	1.00834	0.99154	1.00194
7205.52	0.92418	1.00376	0.98642	1.00553
7206.52	0.91589	1.00047	0.98272	1.00293
7207.51	0.91101	0.99849	0.98053	0.99652
7208.5	0.91002	0.99805	0.9778	0.9991
7209.54	0.91377	0.99791	0.97609	0.9961
7210.53	0.92321	0.99448	0.97437	0.99533
7211.54	0.93751	0.99378	0.97393	0.99072
7212.52	0.95723	0.99062	0.97337	0.98534
7213.52	0.97972	0.98602	0.9728	0.98038
7214.53	1.00464	0.98495	0.97355	0.97864
7215.52	1.03048	0.9811	0.97435	0.97591
7216.53	1.05448	0.97864	0.97639	0.98603
7217.5	1.07644	0.98044	0.97843	0.97244
7218.53	1.09439	0.97713	0.98157	0.97087
7219.53	1.10881	0.97935	0.98452	0.96945
7220.54	1.11785	0.98043	0.98714	0.97359
7221.52	1.12166	0.97723	0.98964	0.96932
7222.51	1.12008	0.97683	0.99131	0.97146
7223.51	1.1134	0.97748	0.99283	0.9686
7224.52	1.10212	0.97726	0.99363	0.96808
7225.53	1.08775	0.97637	0.99442	0.96779
7226.51	1.07116	0.9735	0.99423	0.96246
7227.53	1.05382	0.97536	0.99395	0.96619
7228.52	1.03497	0.97538	0.99304	0.97292
7229.54	1.01665	0.97608	0.99211	0.96605
7230.52	0.99798	0.97313	0.9903	0.96331
7231.52	0.98087	0.97474	0.98837	0.96383
7232.53	0.96418	0.97651	0.9874	0.95717
7233.51	0.94898	0.97255	0.98646	0.95908
7234.52	0.93593	0.97366	0.98631	0.96141
7235.51	0.92497	0.97184	0.98626	0.95984
7236.52	0.91677	0.97188	0.98677	0.95495
7237.52	0.91091	0.97559	0.9873	0.9538
7238.53	0.90744	0.97417	0.98792	0.95781
7239.52	0.90663	0.96866	0.9885	0.95879
7240.51	0.90757	0.96776	0.98849	0.95637
7241.51	0.91045	0.96852	0.98834	0.95297
7242.51	0.91504	0.96939	0.98767	0.95918
7243.52	0.92074	0.96984	0.98697	0.9616
7244.5	0.9274	0.9725	0.98475	0.96127
7245.53	0.93424	0.97051	0.98245	0.9674
7246.53	0.94111	0.97208	0.98048	0.97056
7247.53	0.94708	0.97419	0.97847	0.97454
7248.51	0.95199	0.97509	0.97665	0.97836
7249.52	0.95534	0.97745	0.97479	0.97961
7250.52	0.95709	0.98239	0.97416	0.98317
7251.52	0.95722	0.98368	0.97354	0.98244
7252.52	0.95603	0.9862	0.9735	0.98709
7253.51	0.95376	0.98578	0.97355	0.98816
7254.53	0.95103	0.99003	0.97458	0.99467
7255.51	0.94838	0.99137	0.9756	0.99288
7256.53	0.94662	0.99312	0.97774	0.99636
7257.52	0.94612	0.99319	0.9799	1.00439
7258.51	0.94707	0.99983	0.98316	1.00643
7259.53	0.94939	1.00312	0.98649	1.00974
7260.51	0.95284	1.00491	0.98971	1.00917
7261.53	0.95688	1.00817	0.993	1.0116
7262.5	0.96111	1.00644	0.99611	1.01699
7263.53	0.965	1.01135	0.99926	1.01717
7264.53	0.96875	1.01485	1.00186	1.01378
7265.53	0.97193	1.01463	1.00448	1.0197
7266.53	0.97513	1.01781	1.00692	1.02722
7267.5	0.97839	1.01473	1.00925	1.01754
7268.52	0.98206	1.01799	1.01063	1.01922
7269.52	0.98681	1.01885	1.01197	1.02946
7270.51	0.99247	1.01855	1.01252	1.0266
7271.51	0.9988	1.0202	1.01296	1.02359
7272.53	1.00562	1.02262	1.01335	1.02458
7273.52	1.01224	1.0191	1.01374	1.02368
7274.53	1.01789	1.02029	1.01493	1.03275
7275.53	1.0225	1.02081	1.01617	1.02742
7276.51	1.02611	1.01712	1.0181	1.0295
7277.51	1.02894	1.01801	1.02003	1.02328
7278.52	1.03168	1.0154	1.02183	1.02966
7279.52	1.0347	1.01791	1.02361	1.02446
7280.51	1.03818	1.01577	1.02477	1.02315
7281.52	1.0422	1.01848	1.02586	1.01938
7282.53	1.04671	1.01512	1.02649	1.01953
7283.53	1.05147	1.0129	1.02711	1.02077
7284.51	1.05633	1.01515	1.02702	1.01641
7285.52	1.06104	1.01227	1.02688	1.01614
7286.52	1.0651	1.01078	1.02636	1.00984
7287.5	1.06863	1.0085	1.02586	1.00994
7288.52	1.07099	1.00522	1.02468	1.00816
7289.52	1.07165	1.00248	1.02343	1.00866
7290.53	1.07011	1.00451	1.02213	1.00447
7291.52	1.06634	1.00016	1.02085	1.00133
7292.54	1.06035	1.00249	1.01957	1.00019
7293.52	1.05276	0.99823	1.01832	0.99955
7294.52	1.04396	0.99771	1.01684	0.99124
7295.51	1.03475	1.00433	1.01545	0.99331
7296.51	1.02535	0.99594	1.01436	0.99148
7297.51	1.01605	0.9992	1.01327	0.99134
7298.52	1.00712	0.9966	1.01148	0.99543
7299.52	0.99871	0.99732	1.00973	0.9935
7300.54	0.99123	0.99827	1.00823	0.99024
7301.53	0.98431	0.99536	1.00677	0.99558
7302.54	0.9783	0.99727	1.00436	0.99413
7303.53	0.97274	0.99483	1.00196	0.9949
7304.51	0.96827	0.993	0.99998	0.98742
7305.53	0.96441	0.99432	0.99792	0.98589
7306.51	0.96111	0.9954	0.99557	0.99182
7307.53	0.95876	0.994	0.99308	0.99306
7308.52	0.95701	0.99285	0.99096	0.99654
7309.52	0.95608	0.9938	0.98886	0.99062
7310.53	0.95592	0.98898	0.98696	0.98949
7311.52	0.95626	0.9905	0.98507	0.99309
7312.54	0.95705	0.99219	0.98274	0.99245
7313.51	0.95798	0.99342	0.98064	0.99133
7315.55	0.95967	0.99002	0.97732	0.99802
7317.64	0.96089	0.9931	0.97342	0.98971
7319.55	0.9613	0.99028	0.97143	0.99409
7321.53	0.96174	0.99452	0.97022	0.9933
7323.52	0.96227	0.99321	0.9711	0.99457
7325.53	0.96304	0.99782	0.97342	0.99361
7327.65	0.96413	0.99378	0.97762	0.98932
7329.55	0.96494	0.99722	0.98197	0.99684
7331.54	0.96488	0.99778	0.98724	0.99548
7333.52	0.96314	0.99319	0.99203	1.00015
7335.52	0.96025	0.99626	0.99707	1.00034
7337.55	0.95755	0.99689	1.0017	0.99686
7339.55	0.95633	0.99692	1.00604	0.9974
7341.54	0.95769	0.99765	1.00948	1.00061
7343.54	0.96208	0.99609	1.01192	0.99529
7345.53	0.96992	0.9954	1.01308	0.99909
7347.53	0.98028	0.99139	1.01344	0.99049
7349.52	0.99171	0.99304	1.01214	0.99105
7351.52	1.00284	0.99785	1.01077	0.99061
7353.54	1.01328	0.99342	1.00872	0.99759
7355.55	1.02293	0.99613	1.00722	0.98771
7357.53	1.0318	0.99374	1.00549	0.98916
7359.54	1.03983	0.99559	1.00359	0.99646
7361.53	1.04737	0.99848	1.00211	0.99198
7363.52	1.05376	0.99786	1.00006	0.99221
7365.55	1.05837	0.99581	0.99793	0.99881
7367.53	1.06069	0.99836	0.99579	0.99763
7369.53	1.06035	0.99762	0.99356	0.99729
7371.53	1.05718	1.00016	0.99142	0.99858
7373.52	1.05068	1.00124	0.98944	0.99542
7375.54	1.04081	1.00135	0.98853	0.99496
7377.52	1.02785	0.99625	0.988	0.99626
7379.53	1.01226	1.00094	0.98783	1.00164
7381.53	0.99589	0.9998	0.98747	1.00166
7383.54	0.98078	0.99859	0.98734	1.00305
7385.52	0.9693	1.0015	0.98735	1.00518
7387.53	0.96264	1.00421	0.98738	1.00856
7389.51	0.96032	1.00528	0.98732	1.00635
7391.53	0.96144	1.0021	0.98728	1.00897
7393.53	0.96475	1.00625	0.98816	1.00294
7395.52	0.96886	1.00722	0.98954	1.00438
7397.52	0.9728	1.00413	0.99136	1.00683
7399.52	0.9758	1.00174	0.99383	1.01599
7401.53	0.97742	1.0047	0.99658	1.00471
7403.52	0.97818	1.00105	0.99946	1.01267
7405.53	0.97889	1.00353	1.00228	1.00295
7407.52	0.97988	1.00371	1.00484	1.00838
7409.54	0.98121	1.004	1.00713	1.00997
7411.55	0.98275	1.0021	1.00876	1.00739
7413.53	0.98431	1.00372	1.0099	1.00725
7415.51	0.98565	0.99942	1.01061	0.99916
7417.53	0.98671	0.99644	1.01098	0.99751
7419.52	0.98709	0.99963	1.01099	1.00193
7421.55	0.98678	0.9983	1.01067	0.99132
7423.52	0.98543	0.99913	1.00936	0.99462
7425.52	0.98352	0.99877	1.00803	0.99708
7427.53	0.98149	0.9946	1.00669	1.00048
7429.55	0.98051	0.99506	1.00511	0.99191
7431.53	0.98083	0.99574	1.0032	0.99307
7433.53	0.98214	0.9957	1.00092	0.9896
7435.5	0.98398	0.99555	0.99924	1.00072
7437.55	0.98645	0.99832	0.9974	0.99726
7439.53	0.98991	1.0005	0.99557	0.99644
7441.53	0.99437	0.99775	0.99324	0.99215
7443.52	0.99974	0.99575	0.99138	0.99602
7445.51	1.00554	0.99944	0.98989	0.99156
7447.53	1.01115	0.99441	0.98876	0.99527
7449.52	1.01603	0.99736	0.9881	0.99815
7451.52	1.01964	0.99423	0.98781	0.99616
7453.53	1.02208	0.99639	0.9878	0.99872
7455.53	1.02363	0.99639	0.98805	0.99889
7457.54	1.02444	0.99432	0.98862	0.99309
7459.51	1.02489	0.99852	0.9896	1.00256
7461.53	1.02495	0.99465	0.99066	1.00031
7463.51	1.02435	0.99461	0.99173	0.99642
7465.54	1.02303	0.99364	0.99248	1.00055
7467.53	1.02063	0.99881	0.9933	1.00276
7469.52	1.01751	0.99938	0.99419	1.00598
7471.54	1.01389	0.99808	0.99522	1.00064
7473.52	1.01008	1.00138	0.99621	0.99592
7475.52	1.00664	0.99892	0.99718	0.99964
7477.53	1.00365	0.99609	0.99827	1.00591
7479.52	1.00137	1.00108	0.99915	0.99926
7481.53	0.99947	0.99748	0.99986	1.00113
7483.54	0.99742	1.00242	1.00051	0.99705
7485.54	0.995	1.00044	1.00099	1.00254
7487.51	0.99218	0.99697	1.00131	1.00155
7489.52	0.98935	0.99615	1.00097	1.0014
7491.52	0.9867	0.99661	1.00083	0.9951
7493.53	0.98458	0.99888	1.00081	1.00158
7495.55	0.98323	1.00264	1.0007	1.0013
7497.52	0.98281	1.00169	1.00046	0.99995
7499.53	0.98353	1.00009	1.00008	0.99787
7501.53	0.98494	1.00276	1.00001	0.99938
7503.52	0.98673	1.00125	0.99982	1.0014
7505.54	0.98867	1.00134	0.99955	0.99621
7507.52	0.99028	0.99941	0.99943	0.99773
7509.54	0.99168	1.00308	0.99929	0.99659
7511.52	0.99257	1.00108	0.99914	1.00015
7513.54	0.99309	1.00297	0.99887	0.99886
7515.53	0.99323	0.99915	0.99861	0.99521
7517.52	0.99321	0.99993	0.99825	0.99874
7519.5	0.99314	0.99922	0.99799	0.99846
7521.52	0.99337	1.00242	0.99817	0.99851
7523.55	0.99383	1.00257	0.99835	0.99908
7525.53	0.99441	0.99942	0.99849	0.99498
7527.54	0.99534	0.99911	0.99864	0.99746
7529.51	0.99645	0.99762	0.99879	1.00146
7531.52	0.99768	1.00153	0.99895	1.002
7533.54	0.99887	0.99966	0.99906	1.0008
7535.53	0.99979	1.00192	0.99916	0.99766
7537.51	1.00036	0.99959	0.99918	0.99837
7539.54	1.00058	0.99803	0.9992	1.00253
7541.53	1.00056	1.00094	0.99927	0.99961
7543.53	1.00056	1.00111	0.99939	1.00003
7545.52	1.00053	1.00447	0.99967	0.99685
7547.53	1.00066	1.00152	0.99993	0.99235
7549.52	1.00088	0.99958	1.00011	0.99639
7551.54	1.00147	0.99991	1.00029	0.99652
7553.55	1.00242	0.99625	1.00051	1.0007
7555.53	1.0039	1.00081	1.00072	1.00019
7557.53	1.00586	1.0009	1.00077	1.00173
7559.53	1.00799	1.00287	1.00083	1.00744
7561.54	1.01008	1.003	1.00059	1.00581
7563.54	1.01191	1.00391	1.00039	1.00786
7565.53	1.0133	1.00469	1.00036	1.00162
7567.52	1.01415	1.00011	1.00037	1.00094
7569.51	1.01438	0.99647	1.00051	1.00179
7571.52	1.01407	1.00149	1.00065	0.99823
7573.53	1.01309	1.00507	1.00073	0.99994
7575.52	1.0117	1.00078	1.0008	1.00239
7577.53	1.00997	0.99494	1.00081	0.99897
7579.53	1.00793	1.00142	1.00081	0.99669
7581.54	1.0058	0.99648	1.00072	1.00146
7583.51	1.00372	1.00065	1.00063	1.00113
7585.51	1.00205	0.99919	1.00045	1.00335
7587.53	1.00082	0.99968	1.00033	1.00112
7589.52	0.99996	0.99531	1.00043	1.0029
7591.53	0.99953	1.00417	1.0005	0.996
7593.54	0.99929	0.99809	1.00042	1.00267
7595.51	0.99945	0.9992	1.00035	0.99346
7597.52	0.99982	1.00104	1.0003	0.99731
7599.52	1.00036	0.99934	1.00025	1.00423
7601.53	1.00092	0.99742	1.00018	0.99522
7603.53	1.00123	1.00277	1.0001	0.99864
7605.52	1.00137	1.00196	0.99971	1.00103
7607.53	1.00123	1.00204	0.99946	0.99879
7609.53	1.00083	0.99934	0.99958	1.00023
7611.53	1.0002	1.00399	0.99972	0.99808
7613.52	0.99952	1.00075	0.99993	1.00268
7615.51	0.99905	1.00344	1.00018	1.00319
7617.52	0.99879	1.00517	1.00062	1.00138
7619.53	0.99899	1.00631	1.00107	0.99757
7621.54	0.99954	0.9984	1.00161	0.99986
7623.54	1.00033	1.00115	1.00212	0.99844
7625.52	1.00117	1.00385	1.00232	0.99914
7627.53	1.00193	1.00151	1.00253	1.00784
7629.52	1.00249	1.00301	1.00277	1.00502
7631.54	1.00277	1.00328	1.00295	1.00173
7633.54	1.00267	1.00083	1.0029	1.00564
7635.53	1.00231	0.99762	1.00281	1.00152
7637.52	1.00176	0.99953	1.00252	1.00355
7639.52	1.00106	1.00108	1.00224	1.00397
7641.53	1.00029	1.00088	1.00199	1.00538
7643.52	0.9995	0.99947	1.00172	1.00398
7645.55	0.99887	0.9992	1.0012	1.00008
7647.52	0.99887	1.00445	1.00078	1.00507
7649.53	0.99851	0.99616	1.00063	1.00097
7651.55	0.99833	1.00273	1.0005	1.00023
7653.54	0.99834	1.00298	1.00047	1.00364
7655.52	0.99842	1.00044	1.00045	1.00501
7657.53	0.99862	1.00217	1.00051	1.00376
7659.53	0.99889	1.00032	1.00057	0.99993
7661.55	0.99934	1.00274	1.00064	1.00843
7663.55	0.99992	1.00017	1.00069	0.99624
7665.55	1.00056	1.0049	1.00059	1.00095
7667.53	1.00138	1.00392	1.00052	1.00142
7669.52	1.00217	1.00226	1.00055	1.00624
7671.53	1.00307	1.00131	1.00058	1.00222
7673.55	1.00392	1.00146	1.00065	1.00482
7675.54	1.00481	1.0047	1.00075	1.00683
7677.52	1.0056	1.00022	1.00094	1.00993
7679.53	1.00642	1.00451	1.00116	1.00509
7681.54	1.00718	0.99967	1.00146	1.00645
7683.53	1.00773	1.00191	1.00169	1.00285
7685.52	1.00803	0.99904	1.00152	1.00255
7687.53	1.00818	1.00052	1.0015	0.99811
7689.54	1.00811	0.99779	1.00179	1.00307
7691.55	1.00781	1.00249	1.00207	0.99708
7693.54	1.00744	1.0011	1.00235	1.00057
7695.51	1.00706	0.9992	1.00264	1.00116
7697.51	1.00661	1.00043	1.00299	1.00247
7699.51	1.00624	1.00331	1.00333	1.00199
7701.55	1.00593	1.00033	1.00363	0.99605
7703.53	1.00558	1.00034	1.00385	1.00495
7705.52	1.0053	0.99897	1.0038	0.99741
7707.52	1.00502	1.00495	1.00387	0.99875
7709.53	1.00466	1.00319	1.00415	0.99873
7711.52	1.00418	0.9996	1.00437	0.99663
7713.52	1.00366	1.00163	1.00441	1.00217
7718.53	1.00455	1.00001	1.00449	0.99797
7723.51	1.00326	1.00292	1.00448	1.00095
7728.52	1.0025	0.99839	1.00433	0.99317
7733.52	1.00247	1.00214	1.00409	0.99717
7738.55	1.00265	1.00081	1.00388	1.0042
7743.56	1.00274	0.99986	1.00363	1.00328
7748.54	1.00265	1.00505	1.00332	0.99987
7753.55	1.00267	0.99818	1.00302	1.00565
7758.65	1.00291	1.0039	1.00269	0.99787
7763.51	1.00253	0.99806	1.00238	0.99714
7768.69	1.00186	1.00441	1.00209	0.99861
7773.53	1.00085	0.9978	1.00196	0.99135
7778.68	1.00002	0.9996	1.00205	0.99301
7783.51	0.99935	0.9982	1.00218	0.99823
7788.66	0.99912	0.9976	1.00237	0.99874
7793.61	0.99879	0.99943	1.00254	0.99645
7798.66	0.99872	0.99948	1.00265	1.0026
7803.62	0.99882	0.99658	1.00275	0.996
7808.63	0.99913	1.0049	1.0028	0.99637
7813.6	0.99941	0.99911	1.00281	0.99794
7818.64	0.99962	0.99682	1.00275	0.9938
7823.64	0.9996	1.00262	1.00262	0.99854
7828.63	0.99946	0.99788	1.00245	1.00245
7833.55	0.99931	0.99823	1.0023	0.99688
7838.63	0.99925	0.99977	1.00217	1.00466
7843.64	0.99903	0.99284	1.0018	0.99901
7848.62	0.99865	1.00393	1.00177	0.99938
7853.53	0.99814	0.99699	1.00182	1.00172
7858.56	0.99771	0.99817	1.00164	0.99453
7863.55	0.99706	0.99892	1.00138	0.99927
7868.62	0.99617	0.99898	1.00109	1.00479
7873.62	0.99535	0.99386	1.00087	1.00308
7878.55	0.99449	1.00049	1.00072	0.99735
7883.53	0.99362	0.99786	1.00063	1.00142
7888.62	0.99286	0.99794	1.00058	0.99637
7893.6	0.99215	0.99783	1.00055	1.00303
7898.62	0.99153	0.99725	1.0005	0.99161
7903.57	0.99084	0.99772	1.00039	0.99829
7908.63	0.99009	0.99775	1.00015	1.00318
7913.54	0.98939	0.99199	0.99984	0.99493

## Sheet: Fig. 3c
x	y	z
-8	0.5	0.01048
-7.95	0.5	0.01053
-7.9	0.5	0.0106
-7.85	0.5	0.01072
-7.8	0.5	0.01079
-7.75	0.5	0.0109
-7.7	0.5	0.01099
-7.65	0.5	0.01104
-7.6	0.5	0.01097
-7.55	0.5	0.01103
-7.5	0.5	0.01095
-7.45	0.5	0.01099
-7.4	0.5	0.01082
-7.35	0.5	0.01045
-7.3	0.5	0.01012
-7.25	0.5	0.00958
-7.2	0.5	0.00935
-7.15	0.5	0.00902
-7.1	0.5	0.00883
-7.05	0.5	0.00853
-7	0.5	0.00834
-6.95	0.5	0.00819
-6.9	0.5	0.00829
-6.85	0.5	0.00837
-6.8	0.5	0.00839
-6.75	0.5	0.00883
-6.7	0.5	0.00921
-6.65	0.5	0.00965
-6.6	0.5	0.00964
-6.55	0.5	0.00998
-6.5	0.5	0.00996
-6.45	0.5	0.01046
-6.4	0.5	0.01106
-6.35	0.5	0.01169
-6.3	0.5	0.01185
-6.25	0.5	0.01264
-6.2	0.5	0.01319
-6.15	0.5	0.01334
-6.1	0.5	0.01325
-6.05	0.5	0.01383
-6	0.5	0.01392
-5.95	0.5	0.01363
-5.9	0.5	0.0142
-5.85	0.5	0.01455
-5.8	0.5	0.01416
-5.75	0.5	0.01391
-5.7	0.5	0.01369
-5.65	0.5	0.0138
-5.6	0.5	0.01347
-5.55	0.5	0.01332
-5.5	0.5	0.01341
-5.45	0.5	0.01306
-5.4	0.5	0.0132
-5.35	0.5	0.0133
-5.3	0.5	0.01325
-5.25	0.5	0.01347
-5.2	0.5	0.01341
-5.15	0.5	0.01317
-5.1	0.5	0.01326
-5.05	0.5	0.01347
-5	0.5	0.0134
-4.95	0.5	0.01325
-4.9	0.5	0.01321
-4.85	0.5	0.01331
-4.8	0.5	0.01331
-4.75	0.5	0.01339
-4.7	0.5	0.01345
-4.65	0.5	0.01352
-4.6	0.5	0.01356
-4.55	0.5	0.0136
-4.5	0.5	0.01361
-4.45	0.5	0.01369
-4.4	0.5	0.01373
-4.35	0.5	0.01385
-4.3	0.5	0.01415
-4.25	0.5	0.01428
-4.2	0.5	0.01451
-4.15	0.5	0.01481
-4.1	0.5	0.01459
-4.05	0.5	0.0145
-4	0.5	0.01431
-3.95	0.5	0.01421
-3.9	0.5	0.01452
-3.85	0.5	0.01454
-3.8	0.5	0.01451
-3.75	0.5	0.01518
-3.7	0.5	0.01528
-3.65	0.5	0.01571
-3.6	0.5	0.01575
-3.55	0.5	0.01554
-3.5	0.5	0.01498
-3.45	0.5	0.01486
-3.4	0.5	0.01501
-3.35	0.5	0.01472
-3.3	0.5	0.01499
-3.25	0.5	0.01477
-3.2	0.5	0.01461
-3.15	0.5	0.01485
-3.1	0.5	0.01447
-3.05	0.5	0.0142
-3	0.5	0.01434
-2.95	0.5	0.01396
-2.9	0.5	0.01441
-2.85	0.5	0.01467
-2.8	0.5	0.01455
-2.75	0.5	0.01477
-2.7	0.5	0.01471
-2.65	0.5	0.01517
-2.6	0.5	0.01457
-2.55	0.5	0.01431
-2.5	0.5	0.01382
-2.45	0.5	0.01349
-2.4	0.5	0.01347
-2.35	0.5	0.01325
-2.3	0.5	0.0133
-2.25	0.5	0.01361
-2.2	0.5	0.01352
-2.15	0.5	0.01357
-2.1	0.5	0.01364
-2.05	0.5	0.01364
-2	0.5	0.01368
-1.95	0.5	0.01368
-1.9	0.5	0.01371
-1.85	0.5	0.01373
-1.8	0.5	0.01375
-1.75	0.5	0.01377
-1.7	0.5	0.01379
-1.65	0.5	0.01381
-1.6	0.5	0.01383
-1.55	0.5	0.01385
-1.5	0.5	0.01387
-1.45	0.5	0.01389
-1.4	0.5	0.01391
-1.35	0.5	0.01392
-1.3	0.5	0.01394
-1.25	0.5	0.01396
-1.2	0.5	0.01398
-1.15	0.5	0.01399
-1.1	0.5	0.01401
-1.05	0.5	0.01402
-1	0.5	0.01404
-0.95	0.5	0.01405
-0.9	0.5	0.01407
-0.85	0.5	0.01408
-0.8	0.5	0.0141
-0.75	0.5	0.01411
-0.7	0.5	0.01412
-0.65	0.5	0.01413
-0.6	0.5	0.01415
-0.55	0.5	0.01416
-0.5	0.5	0.01417
-0.45	0.5	0.01418
-0.4	0.5	0.01419
-0.35	0.5	0.0142
-0.3	0.5	0.01421
-0.25	0.5	0.01422
-0.2	0.5	0.01423
-0.15	0.5	0.01424
-0.1	0.5	0.01425
-0.05	0.5	0.01426
0	0.5	0.01427
0.05	0.5	0.01427
0.1	0.5	0.01428
0.15	0.5	0.01429
0.2	0.5	0.01429
0.25	0.5	0.0143
0.3	0.5	0.0143
0.35	0.5	0.01431
0.4	0.5	0.01431
0.45	0.5	0.01432
0.5	0.5	0.01432
0.55	0.5	0.01433
0.6	0.5	0.01433
0.65	0.5	0.01433
0.7	0.5	0.01433
0.75	0.5	0.01434
0.8	0.5	0.01434
0.85	0.5	0.01434
0.9	0.5	0.01434
0.95	0.5	0.01434
1	0.5	0.01434
1.05	0.5	0.01434
1.1	0.5	0.01434
1.15	0.5	0.01434
1.2	0.5	0.01434
1.25	0.5	0.01434
1.3	0.5	0.01434
1.35	0.5	0.01433
1.4	0.5	0.01433
1.45	0.5	0.01433
1.5	0.5	0.01432
1.55	0.5	0.01432
1.6	0.5	0.01432
1.65	0.5	0.01431
1.7	0.5	0.01431
1.75	0.5	0.0143
1.8	0.5	0.01429
1.85	0.5	0.01429
1.9	0.5	0.01428
1.95	0.5	0.01427
2	0.5	0.01427
2.05	0.5	0.01426
2.1	0.5	0.01425
2.15	0.5	0.01424
2.2	0.5	0.01423
2.25	0.5	0.01423
2.3	0.5	0.01422
2.35	0.5	0.01421
2.4	0.5	0.0142
2.45	0.5	0.01419
2.5	0.5	0.01417
2.55	0.5	0.01416
2.6	0.5	0.01415
2.65	0.5	0.01414
2.7	0.5	0.01413
2.75	0.5	0.01412
2.8	0.5	0.0141
2.85	0.5	0.01409
2.9	0.5	0.01408
2.95	0.5	0.01406
3	0.5	0.01405
3.05	0.5	0.01403
3.1	0.5	0.01402
3.15	0.5	0.014
3.2	0.5	0.01399
3.25	0.5	0.01397
3.3	0.5	0.01395
3.35	0.5	0.01394
3.4	0.5	0.01392
3.45	0.5	0.0139
3.5	0.5	0.01389
3.55	0.5	0.01387
3.6	0.5	0.01385
3.65	0.5	0.01383
3.7	0.5	0.01381
3.75	0.5	0.01379
3.8	0.5	0.01377
3.85	0.5	0.01375
3.9	0.5	0.01373
3.95	0.5	0.01371
4	0.5	0.01369
4.05	0.5	0.01367
4.1	0.5	0.01365
4.15	0.5	0.01363
4.2	0.5	0.01361
4.25	0.5	0.01358
4.3	0.5	0.01356
4.35	0.5	0.01354
4.4	0.5	0.01352
4.45	0.5	0.01349
4.5	0.5	0.01347
4.55	0.5	0.01345
4.6	0.5	0.01342
4.65	0.5	0.0134
4.7	0.5	0.01337
4.75	0.5	0.01335
4.8	0.5	0.01332
4.85	0.5	0.0133
4.9	0.5	0.01327
4.95	0.5	0.01325
5	0.5	0.01322
5.05	0.5	0.01319
5.1	0.5	0.01317
5.15	0.5	0.01314
5.2	0.5	0.01311
5.25	0.5	0.01309
5.3	0.5	0.01306
5.35	0.5	0.01303
5.4	0.5	0.013
5.45	0.5	0.01297
5.5	0.5	0.01295
5.55	0.5	0.01292
5.6	0.5	0.01289
5.65	0.5	0.01286
5.7	0.5	0.01283
5.75	0.5	0.0128
5.8	0.5	0.01277
5.85	0.5	0.01274
5.9	0.5	0.01271
5.95	0.5	0.01268
6	0.5	0.01265
6.05	0.5	0.01262
6.1	0.5	0.01259
6.15	0.5	0.01256
6.2	0.5	0.01253
6.25	0.5	0.0125
6.3	0.5	0.01247
6.35	0.5	0.01243
6.4	0.5	0.0124
6.45	0.5	0.01237
6.5	0.5	0.01234
6.55	0.5	0.01231
6.6	0.5	0.01227
6.65	0.5	0.01224
6.7	0.5	0.01221
6.75	0.5	0.01218
6.8	0.5	0.01214
6.85	0.5	0.01211
6.9	0.5	0.01208
6.95	0.5	0.01205
7	0.5	0.01201
7.05	0.5	0.01198
7.1	0.5	0.01195
7.15	0.5	0.01191
7.2	0.5	0.01188
7.25	0.5	0.01185
7.3	0.5	0.01181
7.35	0.5	0.01178
7.4	0.5	0.01174
7.45	0.5	0.01171
7.5	0.5	0.01168
7.55	0.5	0.01164
7.6	0.5	0.01161
7.65	0.5	0.01157
7.7	0.5	0.01154
7.75	0.5	0.0115
7.8	0.5	0.01147
7.85	0.5	0.01144
7.9	0.5	0.0114
7.95	0.5	0.01137
8	0.5	0.01133
8.05	0.5	0.0113
8.1	0.5	0.01126
8.15	0.5	0.01123
8.2	0.5	0.01119
8.25	0.5	0.01116
8.3	0.5	0.01112
8.35	0.5	0.01109
8.4	0.5	0.01105
8.45	0.5	0.01102
8.5	0.5	0.01098
8.55	0.5	0.01095
8.6	0.5	0.01092
8.65	0.5	0.01088
8.7	0.5	0.01085
8.75	0.5	0.01081
8.8	0.5	0.01078
8.85	0.5	0.01074
8.9	0.5	0.01071
8.95	0.5	0.01067
9	0.5	0.01064
9.05	0.5	0.0106
9.1	0.5	0.01057
9.15	0.5	0.01053
9.2	0.5	0.0105
9.25	0.5	0.01046
9.3	0.5	0.01043
9.35	0.5	0.0104
9.4	0.5	0.01036
9.45	0.5	0.01033
9.5	0.5	0.01029
9.55	0.5	0.01026
9.6	0.5	0.01023
9.65	0.5	0.01019
9.7	0.5	0.01016
9.75	0.5	0.01012
9.8	0.5	0.01009
9.85	0.5	0.01006
9.9	0.5	0.01002
9.95	0.5	0.00999
10	0.5	0.00996
10.05	0.5	0.00992
10.1	0.5	0.00989
10.15	0.5	0.00986
10.2	0.5	0.00982
10.25	0.5	0.00979
10.3	0.5	0.00976
10.35	0.5	0.00973
10.4	0.5	0.00969
10.45	0.5	0.00966
10.5	0.5	0.00963
10.55	0.5	0.0096
10.6	0.5	0.00956
10.65	0.5	0.00953
10.7	0.5	0.0095
10.75	0.5	0.00947
10.8	0.5	0.00944
10.85	0.5	0.0094
10.9	0.5	0.00937
10.95	0.5	0.00934
11	0.5	0.00931
11.05	0.5	0.00928
11.1	0.5	0.00925
11.15	0.5	0.00922
11.2	0.5	0.00919
11.25	0.5	0.00916
11.3	0.5	0.00913
11.35	0.5	0.0091
11.4	0.5	0.00907
11.45	0.5	0.00904
11.5	0.5	0.00901
11.55	0.5	0.00898
11.6	0.5	0.00895
11.65	0.5	0.00892
11.7	0.5	0.00889
11.75	0.5	0.00886
11.8	0.5	0.00883
11.85	0.5	0.0088
11.9	0.5	0.00878
11.95	0.5	0.00875
12	0.5	0.00872
12.05	0.5	0.00869
12.1	0.5	0.00866
12.15	0.5	0.00864
12.2	0.5	0.00861
12.25	0.5	0.00858
12.3	0.5	0.00855
12.35	0.5	0.00853
12.4	0.5	0.0085
12.45	0.5	0.00847
12.5	0.5	0.00845
12.55	0.5	0.00842
12.6	0.5	0.00839
12.65	0.5	0.00837
12.7	0.5	0.00834
12.75	0.5	0.00832
12.8	0.5	0.00829
12.85	0.5	0.00827
12.9	0.5	0.00824
12.95	0.5	0.00822
13	0.5	0.00819
13.05	0.5	0.00817
13.1	0.5	0.00814
13.15	0.5	0.00812
13.2	0.5	0.00809
13.25	0.5	0.00807
13.3	0.5	0.00804
13.35	0.5	0.00802
13.4	0.5	0.008
13.45	0.5	0.00797
13.5	0.5	0.00795
13.55	0.5	0.00793
13.6	0.5	0.0079
13.65	0.5	0.00788
13.7	0.5	0.00786
13.75	0.5	0.00783
13.8	0.5	0.00781
13.85	0.5	0.00779
13.9	0.5	0.00777
13.95	0.5	0.00775
14	0.5	0.00772
14.05	0.5	0.0077
14.1	0.5	0.00768
14.15	0.5	0.00766
14.2	0.5	0.00764
14.25	0.5	0.00762
14.3	0.5	0.00759
14.35	0.5	0.00757
14.4	0.5	0.00755
14.45	0.5	0.00753
14.5	0.5	0.00751
14.55	0.5	0.00749
14.6	0.5	0.00747
14.65	0.5	0.00745
14.7	0.5	0.00743
14.75	0.5	0.00741
14.8	0.5	0.00739
14.85	0.5	0.00737
14.9	0.5	0.00735
14.95	0.5	0.00733
15	0.5	0.00731
15.05	0.5	0.00729
15.1	0.5	0.00727
15.15	0.5	0.00725
15.2	0.5	0.00724
15.25	0.5	0.00722
15.3	0.5	0.0072
15.35	0.5	0.00718
15.4	0.5	0.00716
15.45	0.5	0.00714
15.5	0.5	0.00712
15.55	0.5	0.00711
15.6	0.5	0.00709
15.65	0.5	0.00707
15.7	0.5	0.00705
15.75	0.5	0.00703
15.8	0.5	0.00701
15.85	0.5	0.007
15.9	0.5	0.00698
15.95	0.5	0.00696
16	0.5	0.00694
16.05	0.5	0.00693
16.1	0.5	0.00691
16.15	0.5	0.00689
16.2	0.5	0.00687
16.25	0.5	0.00686
16.3	0.5	0.00684
16.35	0.5	0.00682
16.4	0.5	0.0068
16.45	0.5	0.00679
16.5	0.5	0.00677
16.55	0.5	0.00675
16.6	0.5	0.00674
16.65	0.5	0.00672
16.7	0.5	0.0067
16.75	0.5	0.00669
16.8	0.5	0.00667
16.85	0.5	0.00665
16.9	0.5	0.00664
16.95	0.5	0.00662
17	0.5	0.0066
17.05	0.5	0.00659
17.1	0.5	0.00657
17.15	0.5	0.00655
17.2	0.5	0.00654
17.25	0.5	0.00652
17.3	0.5	0.00652
17.35	0.5	0.00653
17.4	0.5	0.00658
17.45	0.5	0.00667
17.5	0.5	0.00682
17.55	0.5	0.00705
17.6	0.5	0.00735
17.65	0.5	0.00772
17.7	0.5	0.00817
17.75	0.5	0.00868
17.8	0.5	0.00924
17.85	0.5	0.00988
17.9	0.5	0.0106
17.95	0.5	0.01136
18	0.5	0.01216
18.05	0.5	0.01299
18.1	0.5	0.01367
18.15	0.5	0.01423
18.2	0.5	0.01458
18.25	0.5	0.01466
18.3	0.5	0.01454
18.35	0.5	0.01421
18.4	0.5	0.01372
18.45	0.5	0.01311
18.5	0.5	0.01245
18.55	0.5	0.01185
18.6	0.5	0.01143
18.65	0.5	0.01134
18.7	0.5	0.01168
18.75	0.5	0.01248
18.8	0.5	0.01368
18.85	0.5	0.01514
18.9	0.5	0.01678
18.95	0.5	0.01846
19	0.5	0.02003
19.05	0.5	0.02133
19.1	0.5	0.02237
19.15	0.5	0.02308
19.2	0.5	0.02343
19.25	0.5	0.02322
19.3	0.5	0.02252
19.35	0.5	0.02157
19.4	0.5	0.02025
19.45	0.5	0.01879
19.5	0.5	0.01708
19.55	0.5	0.01544
19.6	0.5	0.01392
19.65	0.5	0.01244
19.7	0.5	0.01104
19.75	0.5	0.00974
19.8	0.5	0.00861
19.85	0.5	0.00775
19.9	0.5	0.00721
19.95	0.5	0.00689
20	0.5	0.00681
20.05	0.5	0.00692
20.1	0.5	0.00713
20.15	0.5	0.0074
20.2	0.5	0.00765
20.25	0.5	0.00799
20.3	0.5	0.00819
20.35	0.5	0.00836
20.4	0.5	0.0084
20.45	0.5	0.00832
20.5	0.5	0.00804
20.55	0.5	0.00753
20.6	0.5	0.00696
20.65	0.5	0.00642
20.7	0.5	0.00574
20.75	0.5	0.00507
20.8	0.5	0.00429
20.85	0.5	0.00356
20.9	0.5	0.00291
20.95	0.5	0.00236
21	0.5	0.00212
21.05	0.5	0.00243
21.1	0.5	0.00305
21.15	0.5	0.00417
21.2	0.5	0.0054
21.25	0.5	0.0066
21.3	0.5	0.00784
21.35	0.5	0.00893
21.4	0.5	0.00975
21.45	0.5	0.01029
21.5	0.5	0.01053
21.55	0.5	0.01065
21.6	0.5	0.01031
21.65	0.5	0.00973
21.7	0.5	0.00898
21.75	0.5	0.0081
21.8	0.5	0.00742
21.85	0.5	0.00697
21.9	0.5	0.00692
21.95	0.5	0.00731
22	0.5	0.00795
22.05	0.5	0.00882
22.1	0.5	0.00977
22.15	0.5	0.01071
22.2	0.5	0.01133
22.25	0.5	0.01165
22.3	0.5	0.01172
22.35	0.5	0.01187
22.4	0.5	0.0117
22.45	0.5	0.01159
22.5	0.5	0.0113
22.55	0.5	0.01087
22.6	0.5	0.01035
22.65	0.5	0.00964
22.7	0.5	0.00907
22.75	0.5	0.00828
22.8	0.5	0.00762
22.85	0.5	0.00717
22.9	0.5	0.00675
22.95	0.5	0.00646
23	0.5	0.0063
23.05	0.5	0.006
23.1	0.5	0.00571
23.15	0.5	0.00554
23.2	0.5	0.00541
23.25	0.5	0.00519
23.3	0.5	0.00482
-8	0.551	0.01179
-7.95	0.551	0.01197
-7.9	0.551	0.01217
-7.85	0.551	0.01244
-7.8	0.551	0.01254
-7.75	0.551	0.01274
-7.7	0.551	0.01286
-7.65	0.551	0.01293
-7.6	0.551	0.01284
-7.55	0.551	0.01292
-7.5	0.551	0.01282
-7.45	0.551	0.01287
-7.4	0.551	0.01266
-7.35	0.551	0.01219
-7.3	0.551	0.01174
-7.25	0.551	0.01099
-7.2	0.551	0.01064
-7.15	0.551	0.01013
-7.1	0.551	0.00982
-7.05	0.551	0.00933
-7	0.551	0.00902
-6.95	0.551	0.00876
-6.9	0.551	0.0089
-6.85	0.551	0.00901
-6.8	0.551	0.00904
-6.75	0.551	0.00957
-6.7	0.551	0.00999
-6.65	0.551	0.01044
-6.6	0.551	0.01044
-6.55	0.551	0.01076
-6.5	0.551	0.01077
-6.45	0.551	0.01119
-6.4	0.551	0.01168
-6.35	0.551	0.01218
-6.3	0.551	0.01232
-6.25	0.551	0.01289
-6.2	0.551	0.01329
-6.15	0.551	0.01342
-6.1	0.551	0.0134
-6.05	0.551	0.01378
-6	0.551	0.01387
-5.95	0.551	0.01374
-5.9	0.551	0.01407
-5.85	0.551	0.01429
-5.8	0.551	0.01415
-5.75	0.551	0.01409
-5.7	0.551	0.01405
-5.65	0.551	0.01414
-5.6	0.551	0.0141
-5.55	0.551	0.01412
-5.5	0.551	0.01419
-5.45	0.551	0.01421
-5.4	0.551	0.01429
-5.35	0.551	0.01435
-5.3	0.551	0.01443
-5.25	0.551	0.01447
-5.2	0.551	0.01456
-5.15	0.551	0.01475
-5.1	0.551	0.01479
-5.05	0.551	0.01475
-5	0.551	0.01493
-4.95	0.551	0.01525
-4.9	0.551	0.0155
-4.85	0.551	0.01541
-4.8	0.551	0.01575
-4.75	0.551	0.01553
-4.7	0.551	0.01535
-4.65	0.551	0.01507
-4.6	0.551	0.01518
-4.55	0.551	0.01515
-4.5	0.551	0.01483
-4.45	0.551	0.01512
-4.4	0.551	0.01513
-4.35	0.551	0.01543
-4.3	0.551	0.01609
-4.25	0.551	0.01631
-4.2	0.551	0.01667
-4.15	0.551	0.01713
-4.1	0.551	0.01681
-4.05	0.551	0.01669
-4	0.551	0.01646
-3.95	0.551	0.01633
-3.9	0.551	0.0167
-3.85	0.551	0.01674
-3.8	0.551	0.01673
-3.75	0.551	0.01739
-3.7	0.551	0.01751
-3.65	0.551	0.01791
-3.6	0.551	0.01797
-3.55	0.551	0.01784
-3.5	0.551	0.01745
-3.45	0.551	0.01741
-3.4	0.551	0.01754
-3.35	0.551	0.0174
-3.3	0.551	0.01759
-3.25	0.551	0.01751
-3.2	0.551	0.01747
-3.15	0.551	0.01762
-3.1	0.551	0.01751
-3.05	0.551	0.01746
-3	0.551	0.01755
-2.95	0.551	0.01749
-2.9	0.551	0.01765
-2.85	0.551	0.01776
-2.8	0.551	0.01779
-2.75	0.551	0.01787
-2.7	0.551	0.01792
-2.65	0.551	0.018
-2.6	0.551	0.01806
-2.55	0.551	0.01815
-2.5	0.551	0.0183
-2.45	0.551	0.01846
-2.4	0.551	0.01853
-2.35	0.551	0.01871
-2.3	0.551	0.01876
-2.25	0.551	0.01862
-2.2	0.551	0.01877
-2.15	0.551	0.0188
-2.1	0.551	0.01881
-2.05	0.551	0.01889
-2	0.551	0.01892
-1.95	0.551	0.01901
-1.9	0.551	0.01905
-1.85	0.551	0.01911
-1.8	0.551	0.01916
-1.75	0.551	0.01922
-1.7	0.551	0.01927
-1.65	0.551	0.01933
-1.6	0.551	0.01938
-1.55	0.551	0.01943
-1.5	0.551	0.01949
-1.45	0.551	0.01954
-1.4	0.551	0.01959
-1.35	0.551	0.01965
-1.3	0.551	0.0197
-1.25	0.551	0.01975
-1.2	0.551	0.0198
-1.15	0.551	0.01985
-1.1	0.551	0.0199
-1.05	0.551	0.01995
-1	0.551	0.02
-0.95	0.551	0.02005
-0.9	0.551	0.0201
-0.85	0.551	0.02015
-0.8	0.551	0.0202
-0.75	0.551	0.02024
-0.7	0.551	0.02029
-0.65	0.551	0.02034
-0.6	0.551	0.02038
-0.55	0.551	0.02043
-0.5	0.551	0.02048
-0.45	0.551	0.02052
-0.4	0.551	0.02057
-0.35	0.551	0.02061
-0.3	0.551	0.02065
-0.25	0.551	0.0207
-0.2	0.551	0.02074
-0.15	0.551	0.02078
-0.1	0.551	0.02082
-0.05	0.551	0.02087
0	0.551	0.02091
0.05	0.551	0.02095
0.1	0.551	0.02099
0.15	0.551	0.02103
0.2	0.551	0.02107
0.25	0.551	0.02111
0.3	0.551	0.02114
0.35	0.551	0.02118
0.4	0.551	0.02122
0.45	0.551	0.02126
0.5	0.551	0.02129
0.55	0.551	0.02133
0.6	0.551	0.02136
0.65	0.551	0.0214
0.7	0.551	0.02143
0.75	0.551	0.02147
0.8	0.551	0.0215
0.85	0.551	0.02153
0.9	0.551	0.02157
0.95	0.551	0.0216
1	0.551	0.02163
1.05	0.551	0.02166
1.1	0.551	0.02169
1.15	0.551	0.02172
1.2	0.551	0.02175
1.25	0.551	0.02178
1.3	0.551	0.02181
1.35	0.551	0.02184
1.4	0.551	0.02187
1.45	0.551	0.02189
1.5	0.551	0.02192
1.55	0.551	0.02195
1.6	0.551	0.02197
1.65	0.551	0.022
1.7	0.551	0.02202
1.75	0.551	0.02205
1.8	0.551	0.02207
1.85	0.551	0.02209
1.9	0.551	0.02211
1.95	0.551	0.02214
2	0.551	0.02216
2.05	0.551	0.02218
2.1	0.551	0.0222
2.15	0.551	0.02222
2.2	0.551	0.02224
2.25	0.551	0.02226
2.3	0.551	0.02228
2.35	0.551	0.0223
2.4	0.551	0.02231
2.45	0.551	0.02233
2.5	0.551	0.02235
2.55	0.551	0.02236
2.6	0.551	0.02238
2.65	0.551	0.02239
2.7	0.551	0.02241
2.75	0.551	0.02242
2.8	0.551	0.02243
2.85	0.551	0.02245
2.9	0.551	0.02246
2.95	0.551	0.02247
3	0.551	0.02248
3.05	0.551	0.02249
3.1	0.551	0.0225
3.15	0.551	0.02251
3.2	0.551	0.02252
3.25	0.551	0.02253
3.3	0.551	0.02254
3.35	0.551	0.02255
3.4	0.551	0.02255
3.45	0.551	0.02256
3.5	0.551	0.02257
3.55	0.551	0.02257
3.6	0.551	0.02258
3.65	0.551	0.02258
3.7	0.551	0.02259
3.75	0.551	0.02259
3.8	0.551	0.02259
3.85	0.551	0.0226
3.9	0.551	0.0226
3.95	0.551	0.0226
4	0.551	0.0226
4.05	0.551	0.0226
4.1	0.551	0.0226
4.15	0.551	0.0226
4.2	0.551	0.0226
4.25	0.551	0.0226
4.3	0.551	0.0226
4.35	0.551	0.0226
4.4	0.551	0.02259
4.45	0.551	0.02259
4.5	0.551	0.02259
4.55	0.551	0.02258
4.6	0.551	0.02258
4.65	0.551	0.02257
4.7	0.551	0.02256
4.75	0.551	0.02256
4.8	0.551	0.02255
4.85	0.551	0.02254
4.9	0.551	0.02254
4.95	0.551	0.02253
5	0.551	0.02252
5.05	0.551	0.02251
5.1	0.551	0.0225
5.15	0.551	0.02249
5.2	0.551	0.02248
5.25	0.551	0.02247
5.3	0.551	0.02246
5.35	0.551	0.02245
5.4	0.551	0.02243
5.45	0.551	0.02242
5.5	0.551	0.02241
5.55	0.551	0.02239
5.6	0.551	0.02238
5.65	0.551	0.02237
5.7	0.551	0.02235
5.75	0.551	0.02233
5.8	0.551	0.02232
5.85	0.551	0.0223
5.9	0.551	0.02229
5.95	0.551	0.02227
6	0.551	0.02225
6.05	0.551	0.02223
6.1	0.551	0.02221
6.15	0.551	0.02219
6.2	0.551	0.02218
6.25	0.551	0.02216
6.3	0.551	0.02214
6.35	0.551	0.02211
6.4	0.551	0.02209
6.45	0.551	0.02207
6.5	0.551	0.02205
6.55	0.551	0.02203
6.6	0.551	0.022
6.65	0.551	0.02198
6.7	0.551	0.02196
6.75	0.551	0.02193
6.8	0.551	0.02191
6.85	0.551	0.02188
6.9	0.551	0.02186
6.95	0.551	0.02183
7	0.551	0.02181
7.05	0.551	0.02178
7.1	0.551	0.02175
7.15	0.551	0.02173
7.2	0.551	0.0217
7.25	0.551	0.02167
7.3	0.551	0.02164
7.35	0.551	0.02162
7.4	0.551	0.02159
7.45	0.551	0.02156
7.5	0.551	0.02153
7.55	0.551	0.0215
7.6	0.551	0.02147
7.65	0.551	0.02144
7.7	0.551	0.02141
7.75	0.551	0.02137
7.8	0.551	0.02134
7.85	0.551	0.02131
7.9	0.551	0.02128
7.95	0.551	0.02124
8	0.551	0.02121
8.05	0.551	0.02118
8.1	0.551	0.02114
8.15	0.551	0.02111
8.2	0.551	0.02108
8.25	0.551	0.02104
8.3	0.551	0.02101
8.35	0.551	0.02097
8.4	0.551	0.02093
8.45	0.551	0.0209
8.5	0.551	0.02086
8.55	0.551	0.02083
8.6	0.551	0.02079
8.65	0.551	0.02075
8.7	0.551	0.02071
8.75	0.551	0.02068
8.8	0.551	0.02064
8.85	0.551	0.0206
8.9	0.551	0.02056
8.95	0.551	0.02052
9	0.551	0.02048
9.05	0.551	0.02044
9.1	0.551	0.0204
9.15	0.551	0.02036
9.2	0.551	0.02032
9.25	0.551	0.02028
9.3	0.551	0.02024
9.35	0.551	0.0202
9.4	0.551	0.02016
9.45	0.551	0.02012
9.5	0.551	0.02008
9.55	0.551	0.02003
9.6	0.551	0.01999
9.65	0.551	0.01995
9.7	0.551	0.0199
9.75	0.551	0.01986
9.8	0.551	0.01982
9.85	0.551	0.01977
9.9	0.551	0.01973
9.95	0.551	0.01969
10	0.551	0.01964
10.05	0.551	0.0196
10.1	0.551	0.01955
10.15	0.551	0.01951
10.2	0.551	0.01946
10.25	0.551	0.01942
10.3	0.551	0.01937
10.35	0.551	0.01933
10.4	0.551	0.01928
10.45	0.551	0.01923
10.5	0.551	0.01919
10.55	0.551	0.01914
10.6	0.551	0.01909
10.65	0.551	0.01905
10.7	0.551	0.019
10.75	0.551	0.01895
10.8	0.551	0.0189
10.85	0.551	0.01886
10.9	0.551	0.01881
10.95	0.551	0.01876
11	0.551	0.01871
11.05	0.551	0.01866
11.1	0.551	0.01862
11.15	0.551	0.01857
11.2	0.551	0.01852
11.25	0.551	0.01847
11.3	0.551	0.01842
11.35	0.551	0.01837
11.4	0.551	0.01832
11.45	0.551	0.01827
11.5	0.551	0.01822
11.55	0.551	0.01817
11.6	0.551	0.01812
11.65	0.551	0.01807
11.7	0.551	0.01802
11.75	0.551	0.01797
11.8	0.551	0.01792
11.85	0.551	0.01787
11.9	0.551	0.01782
11.95	0.551	0.01776
12	0.551	0.01771
12.05	0.551	0.01766
12.1	0.551	0.01761
12.15	0.551	0.01756
12.2	0.551	0.01751
12.25	0.551	0.01745
12.3	0.551	0.0174
12.35	0.551	0.01735
12.4	0.551	0.0173
12.45	0.551	0.01724
12.5	0.551	0.01719
12.55	0.551	0.01714
12.6	0.551	0.01709
12.65	0.551	0.01703
12.7	0.551	0.01698
12.75	0.551	0.01693
12.8	0.551	0.01687
12.85	0.551	0.01682
12.9	0.551	0.01677
12.95	0.551	0.01671
13	0.551	0.01666
13.05	0.551	0.01661
13.1	0.551	0.01655
13.15	0.551	0.0165
13.2	0.551	0.01645
13.25	0.551	0.01639
13.3	0.551	0.01634
13.35	0.551	0.01628
13.4	0.551	0.01623
13.45	0.551	0.01617
13.5	0.551	0.01612
13.55	0.551	0.01607
13.6	0.551	0.01601
13.65	0.551	0.01596
13.7	0.551	0.0159
13.75	0.551	0.01585
13.8	0.551	0.01579
13.85	0.551	0.01574
13.9	0.551	0.01568
13.95	0.551	0.01563
14	0.551	0.01557
14.05	0.551	0.01552
14.1	0.551	0.01546
14.15	0.551	0.01541
14.2	0.551	0.01535
14.25	0.551	0.0153
14.3	0.551	0.01524
14.35	0.551	0.01519
14.4	0.551	0.01513
14.45	0.551	0.01507
14.5	0.551	0.01502
14.55	0.551	0.01496
14.6	0.551	0.01491
14.65	0.551	0.01485
14.7	0.551	0.0148
14.75	0.551	0.01474
14.8	0.551	0.01468
14.85	0.551	0.01463
14.9	0.551	0.01457
14.95	0.551	0.01452
15	0.551	0.01446
15.05	0.551	0.01441
15.1	0.551	0.01435
15.15	0.551	0.01429
15.2	0.551	0.01424
15.25	0.551	0.01418
15.3	0.551	0.01413
15.35	0.551	0.01407
15.4	0.551	0.01401
15.45	0.551	0.01396
15.5	0.551	0.0139
15.55	0.551	0.01385
15.6	0.551	0.01379
15.65	0.551	0.01373
15.7	0.551	0.01368
15.75	0.551	0.01362
15.8	0.551	0.01357
15.85	0.551	0.01351
15.9	0.551	0.01345
15.95	0.551	0.0134
16	0.551	0.01334
16.05	0.551	0.01329
16.1	0.551	0.01323
16.15	0.551	0.01317
16.2	0.551	0.01312
16.25	0.551	0.01306
16.3	0.551	0.01301
16.35	0.551	0.01295
16.4	0.551	0.01289
16.45	0.551	0.01284
16.5	0.551	0.01278
16.55	0.551	0.01273
16.6	0.551	0.01267
16.65	0.551	0.01261
16.7	0.551	0.01256
16.75	0.551	0.0125
16.8	0.551	0.01245
16.85	0.551	0.01239
16.9	0.551	0.01234
16.95	0.551	0.01228
17	0.551	0.01222
17.05	0.551	0.01217
17.1	0.551	0.01211
17.15	0.551	0.01206
17.2	0.551	0.012
17.25	0.551	0.01195
17.3	0.551	0.0119
17.35	0.551	0.01186
17.4	0.551	0.01185
17.45	0.551	0.01188
17.5	0.551	0.01195
17.55	0.551	0.01209
17.6	0.551	0.0123
17.65	0.551	0.01257
17.7	0.551	0.01292
17.75	0.551	0.01334
17.8	0.551	0.01382
17.85	0.551	0.01437
17.9	0.551	0.015
17.95	0.551	0.01568
18	0.551	0.01638
18.05	0.551	0.01711
18.1	0.551	0.0177
18.15	0.551	0.01819
18.2	0.551	0.01847
18.25	0.551	0.01851
18.3	0.551	0.01837
18.35	0.551	0.01802
18.4	0.551	0.0175
18.45	0.551	0.01682
18.5	0.551	0.01603
18.55	0.551	0.01517
18.6	0.551	0.01431
18.65	0.551	0.01354
18.7	0.551	0.01296
18.75	0.551	0.01264
18.8	0.551	0.01265
18.85	0.551	0.01298
18.9	0.551	0.01359
18.95	0.551	0.01441
19	0.551	0.01528
19.05	0.551	0.01607
19.1	0.551	0.01674
19.15	0.551	0.01721
19.2	0.551	0.01743
19.25	0.551	0.01725
19.3	0.551	0.01671
19.35	0.551	0.01596
19.4	0.551	0.01493
19.45	0.551	0.01377
19.5	0.551	0.0124
19.55	0.551	0.01107
19.6	0.551	0.0098
19.65	0.551	0.00852
19.7	0.551	0.00726
19.75	0.551	0.006
19.8	0.551	0.00476
19.85	0.551	0.00363
19.9	0.551	0.00269
19.95	0.551	0.00176
20	0.551	0.00102
20.05	0.551	0.000533
20.1	0.551	0.00075
20.15	0.551	0.00121
20.2	0.551	0.00157
20.25	0.551	0.00203
20.3	0.551	0.00227
20.35	0.551	0.00246
20.4	0.551	0.00251
20.45	0.551	0.00244
20.5	0.551	0.00218
20.55	0.551	0.00172
20.6	0.551	0.00123
20.65	0.551	0.000821
20.7	0.551	0.000595
20.75	0.551	0.000922
20.8	0.551	0.00158
20.85	0.551	0.00229
20.9	0.551	0.00301
20.95	0.551	0.0038
21	0.551	0.00468
21.05	0.551	0.00563
21.1	0.551	0.00646
21.15	0.551	0.0076
21.2	0.551	0.00872
21.25	0.551	0.00975
21.3	0.551	0.01078
21.35	0.551	0.01167
21.4	0.551	0.01232
21.45	0.551	0.01273
21.5	0.551	0.0129
21.55	0.551	0.01296
21.6	0.551	0.01264
21.65	0.551	0.01212
21.7	0.551	0.01144
21.75	0.551	0.01062
21.8	0.551	0.0099
21.85	0.551	0.00923
21.9	0.551	0.00874
21.95	0.551	0.00851
22	0.551	0.00853
22.05	0.551	0.00875
22.1	0.551	0.00913
22.15	0.551	0.00959
22.2	0.551	0.00992
22.25	0.551	0.01009
22.3	0.551	0.01011
22.35	0.551	0.01019
22.4	0.551	0.01005
22.45	0.551	0.00994
22.5	0.551	0.00971
22.55	0.551	0.00938
22.6	0.551	0.00898
22.65	0.551	0.00842
22.7	0.551	0.00798
22.75	0.551	0.00735
22.8	0.551	0.00681
22.85	0.551	0.00644
22.9	0.551	0.00608
22.95	0.551	0.00582
23	0.551	0.00568
23.05	0.551	0.0054
23.1	0.551	0.00512
23.15	0.551	0.00495
23.2	0.551	0.00481
23.25	0.551	0.00457
23.3	0.551	0.00411
-8	0.602	0.01245
-7.95	0.602	0.01271
-7.9	0.602	0.01296
-7.85	0.602	0.0133
-7.8	0.602	0.01343
-7.75	0.602	0.01366
-7.7	0.602	0.01381
-7.65	0.602	0.0139
-7.6	0.602	0.01383
-7.55	0.602	0.01393
-7.5	0.602	0.01386
-7.45	0.602	0.01394
-7.4	0.602	0.01378
-7.35	0.602	0.0134
-7.3	0.602	0.01305
-7.25	0.602	0.01246
-7.2	0.602	0.01221
-7.15	0.602	0.01185
-7.1	0.602	0.01165
-7.05	0.602	0.01134
-7	0.602	0.01117
-6.95	0.602	0.01105
-6.9	0.602	0.01117
-6.85	0.602	0.01128
-6.8	0.602	0.01135
-6.75	0.602	0.01166
-6.7	0.602	0.01192
-6.65	0.602	0.01218
-6.6	0.602	0.01223
-6.55	0.602	0.01241
-6.5	0.602	0.01247
-6.45	0.602	0.01267
-6.4	0.602	0.01288
-6.35	0.602	0.01309
-6.3	0.602	0.01318
-6.25	0.602	0.01338
-6.2	0.602	0.01353
-6.15	0.602	0.01362
-6.1	0.602	0.01368
-6.05	0.602	0.01378
-6	0.602	0.01386
-5.95	0.602	0.01395
-5.9	0.602	0.01399
-5.85	0.602	0.01404
-5.8	0.602	0.01418
-5.75	0.602	0.01432
-5.7	0.602	0.01446
-5.65	0.602	0.01453
-5.6	0.602	0.01474
-5.55	0.602	0.01491
-5.5	0.602	0.01497
-5.45	0.602	0.01527
-5.4	0.602	0.0153
-5.35	0.602	0.01534
-5.3	0.602	0.0155
-5.25	0.602	0.01545
-5.2	0.602	0.01563
-5.15	0.602	0.01604
-5.1	0.602	0.01606
-5.05	0.602	0.01593
-5	0.602	0.01621
-4.95	0.602	0.0167
-4.9	0.602	0.01705
-4.85	0.602	0.01693
-4.8	0.602	0.01734
-4.75	0.602	0.0171
-4.7	0.602	0.01692
-4.65	0.602	0.01663
-4.6	0.602	0.01676
-4.55	0.602	0.01675
-4.5	0.602	0.01648
-4.45	0.602	0.01676
-4.4	0.602	0.0168
-4.35	0.602	0.01705
-4.3	0.602	0.01756
-4.25	0.602	0.01774
-4.2	0.602	0.01801
-4.15	0.602	0.01833
-4.1	0.602	0.0182
-4.05	0.602	0.01818
-4	0.602	0.01812
-3.95	0.602	0.01812
-3.9	0.602	0.01832
-3.85	0.602	0.0184
-3.8	0.602	0.01845
-3.75	0.602	0.01871
-3.7	0.602	0.0188
-3.65	0.602	0.01895
-3.6	0.602	0.01903
-3.55	0.602	0.01909
-3.5	0.602	0.01914
-3.45	0.602	0.01922
-3.4	0.602	0.0193
-3.35	0.602	0.01941
-3.3	0.602	0.01946
-3.25	0.602	0.01959
-3.2	0.602	0.01971
-3.15	0.602	0.01974
-3.1	0.602	0.01994
-3.05	0.602	0.02011
-3	0.602	0.02016
-2.95	0.602	0.0204
-2.9	0.602	0.0203
-2.85	0.602	0.02028
-2.8	0.602	0.02044
-2.75	0.602	0.02042
-2.7	0.602	0.02055
-2.65	0.602	0.02038
-2.6	0.602	0.02086
-2.55	0.602	0.02114
-2.5	0.602	0.02162
-2.45	0.602	0.02199
-2.4	0.602	0.02212
-2.35	0.602	0.02245
-2.3	0.602	0.02252
-2.25	0.602	0.02227
-2.2	0.602	0.0225
-2.15	0.602	0.02255
-2.1	0.602	0.02257
-2.05	0.602	0.02268
-2	0.602	0.02274
-1.95	0.602	0.02286
-1.9	0.602	0.02293
-1.85	0.602	0.02301
-1.8	0.602	0.02309
-1.75	0.602	0.02318
-1.7	0.602	0.02326
-1.65	0.602	0.02334
-1.6	0.602	0.02342
-1.55	0.602	0.0235
-1.5	0.602	0.02358
-1.45	0.602	0.02366
-1.4	0.602	0.02374
-1.35	0.602	0.02382
-1.3	0.602	0.0239
-1.25	0.602	0.02397
-1.2	0.602	0.02405
-1.15	0.602	0.02413
-1.1	0.602	0.02421
-1.05	0.602	0.02428
-1	0.602	0.02436
-0.95	0.602	0.02443
-0.9	0.602	0.02451
-0.85	0.602	0.02458
-0.8	0.602	0.02465
-0.75	0.602	0.02473
-0.7	0.602	0.0248
-0.65	0.602	0.02487
-0.6	0.602	0.02494
-0.55	0.602	0.02501
-0.5	0.602	0.02508
-0.45	0.602	0.02515
-0.4	0.602	0.02522
-0.35	0.602	0.02529
-0.3	0.602	0.02536
-0.25	0.602	0.02542
-0.2	0.602	0.02549
-0.15	0.602	0.02556
-0.1	0.602	0.02562
-0.05	0.602	0.02569
0	0.602	0.02575
0.05	0.602	0.02582
0.1	0.602	0.02588
0.15	0.602	0.02594
0.2	0.602	0.026
0.25	0.602	0.02606
0.3	0.602	0.02613
0.35	0.602	0.02619
0.4	0.602	0.02624
0.45	0.602	0.0263
0.5	0.602	0.02636
0.55	0.602	0.02642
0.6	0.602	0.02648
0.65	0.602	0.02653
0.7	0.602	0.02659
0.75	0.602	0.02664
0.8	0.602	0.0267
0.85	0.602	0.02675
0.9	0.602	0.0268
0.95	0.602	0.02686
1	0.602	0.02691
1.05	0.602	0.02696
1.1	0.602	0.02701
1.15	0.602	0.02706
1.2	0.602	0.02711
1.25	0.602	0.02716
1.3	0.602	0.0272
1.35	0.602	0.02725
1.4	0.602	0.0273
1.45	0.602	0.02734
1.5	0.602	0.02739
1.55	0.602	0.02743
1.6	0.602	0.02747
1.65	0.602	0.02752
1.7	0.602	0.02756
1.75	0.602	0.0276
1.8	0.602	0.02764
1.85	0.602	0.02768
1.9	0.602	0.02772
1.95	0.602	0.02776
2	0.602	0.02779
2.05	0.602	0.02783
2.1	0.602	0.02787
2.15	0.602	0.0279
2.2	0.602	0.02794
2.25	0.602	0.02797
2.3	0.602	0.028
2.35	0.602	0.02804
2.4	0.602	0.02807
2.45	0.602	0.0281
2.5	0.602	0.02813
2.55	0.602	0.02816
2.6	0.602	0.02819
2.65	0.602	0.02822
2.7	0.602	0.02824
2.75	0.602	0.02827
2.8	0.602	0.0283
2.85	0.602	0.02832
2.9	0.602	0.02835
2.95	0.602	0.02837
3	0.602	0.02839
3.05	0.602	0.02842
3.1	0.602	0.02844
3.15	0.602	0.02846
3.2	0.602	0.02848
3.25	0.602	0.0285
3.3	0.602	0.02852
3.35	0.602	0.02853
3.4	0.602	0.02855
3.45	0.602	0.02857
3.5	0.602	0.02858
3.55	0.602	0.0286
3.6	0.602	0.02861
3.65	0.602	0.02862
3.7	0.602	0.02864
3.75	0.602	0.02865
3.8	0.602	0.02866
3.85	0.602	0.02867
3.9	0.602	0.02868
3.95	0.602	0.02869
4	0.602	0.0287
4.05	0.602	0.0287
4.1	0.602	0.02871
4.15	0.602	0.02872
4.2	0.602	0.02872
4.25	0.602	0.02873
4.3	0.602	0.02873
4.35	0.602	0.02873
4.4	0.602	0.02873
4.45	0.602	0.02874
4.5	0.602	0.02874
4.55	0.602	0.02874
4.6	0.602	0.02874
4.65	0.602	0.02873
4.7	0.602	0.02873
4.75	0.602	0.02873
4.8	0.602	0.02872
4.85	0.602	0.02872
4.9	0.602	0.02872
4.95	0.602	0.02871
5	0.602	0.0287
5.05	0.602	0.0287
5.1	0.602	0.02869
5.15	0.602	0.02868
5.2	0.602	0.02867
5.25	0.602	0.02866
5.3	0.602	0.02865
5.35	0.602	0.02864
5.4	0.602	0.02863
5.45	0.602	0.02861
5.5	0.602	0.0286
5.55	0.602	0.02858
5.6	0.602	0.02857
5.65	0.602	0.02855
5.7	0.602	0.02854
5.75	0.602	0.02852
5.8	0.602	0.0285
5.85	0.602	0.02848
5.9	0.602	0.02847
5.95	0.602	0.02845
6	0.602	0.02843
6.05	0.602	0.0284
6.1	0.602	0.02838
6.15	0.602	0.02836
6.2	0.602	0.02834
6.25	0.602	0.02831
6.3	0.602	0.02829
6.35	0.602	0.02826
6.4	0.602	0.02824
6.45	0.602	0.02821
6.5	0.602	0.02819
6.55	0.602	0.02816
6.6	0.602	0.02813
6.65	0.602	0.0281
6.7	0.602	0.02807
6.75	0.602	0.02804
6.8	0.602	0.02801
6.85	0.602	0.02798
6.9	0.602	0.02795
6.95	0.602	0.02792
7	0.602	0.02788
7.05	0.602	0.02785
7.1	0.602	0.02781
7.15	0.602	0.02778
7.2	0.602	0.02774
7.25	0.602	0.02771
7.3	0.602	0.02767
7.35	0.602	0.02763
7.4	0.602	0.0276
7.45	0.602	0.02756
7.5	0.602	0.02752
7.55	0.602	0.02748
7.6	0.602	0.02744
7.65	0.602	0.0274
7.7	0.602	0.02736
7.75	0.602	0.02732
7.8	0.602	0.02727
7.85	0.602	0.02723
7.9	0.602	0.02719
7.95	0.602	0.02714
8	0.602	0.0271
8.05	0.602	0.02705
8.1	0.602	0.02701
8.15	0.602	0.02696
8.2	0.602	0.02691
8.25	0.602	0.02687
8.3	0.602	0.02682
8.35	0.602	0.02677
8.4	0.602	0.02672
8.45	0.602	0.02667
8.5	0.602	0.02662
8.55	0.602	0.02657
8.6	0.602	0.02652
8.65	0.602	0.02647
8.7	0.602	0.02642
8.75	0.602	0.02637
8.8	0.602	0.02632
8.85	0.602	0.02626
8.9	0.602	0.02621
8.95	0.602	0.02616
9	0.602	0.0261
9.05	0.602	0.02605
9.1	0.602	0.02599
9.15	0.602	0.02594
9.2	0.602	0.02588
9.25	0.602	0.02582
9.3	0.602	0.02577
9.35	0.602	0.02571
9.4	0.602	0.02565
9.45	0.602	0.02559
9.5	0.602	0.02553
9.55	0.602	0.02547
9.6	0.602	0.02541
9.65	0.602	0.02535
9.7	0.602	0.02529
9.75	0.602	0.02523
9.8	0.602	0.02517
9.85	0.602	0.02511
9.9	0.602	0.02505
9.95	0.602	0.02499
10	0.602	0.02492
10.05	0.602	0.02486
10.1	0.602	0.0248
10.15	0.602	0.02473
10.2	0.602	0.02467
10.25	0.602	0.02461
10.3	0.602	0.02454
10.35	0.602	0.02448
10.4	0.602	0.02441
10.45	0.602	0.02435
10.5	0.602	0.02428
10.55	0.602	0.02421
10.6	0.602	0.02415
10.65	0.602	0.02408
10.7	0.602	0.02401
10.75	0.602	0.02394
10.8	0.602	0.02388
10.85	0.602	0.02381
10.9	0.602	0.02374
10.95	0.602	0.02367
11	0.602	0.0236
11.05	0.602	0.02353
11.1	0.602	0.02346
11.15	0.602	0.02339
11.2	0.602	0.02332
11.25	0.602	0.02325
11.3	0.602	0.02318
11.35	0.602	0.02311
11.4	0.602	0.02304
11.45	0.602	0.02297
11.5	0.602	0.02289
11.55	0.602	0.02282
11.6	0.602	0.02275
11.65	0.602	0.02268
11.7	0.602	0.0226
11.75	0.602	0.02253
11.8	0.602	0.02246
11.85	0.602	0.02238
11.9	0.602	0.02231
11.95	0.602	0.02224
12	0.602	0.02216
12.05	0.602	0.02209
12.1	0.602	0.02201
12.15	0.602	0.02194
12.2	0.602	0.02186
12.25	0.602	0.02179
12.3	0.602	0.02171
12.35	0.602	0.02164
12.4	0.602	0.02156
12.45	0.602	0.02148
12.5	0.602	0.02141
12.55	0.602	0.02133
12.6	0.602	0.02126
12.65	0.602	0.02118
12.7	0.602	0.0211
12.75	0.602	0.02103
12.8	0.602	0.02095
12.85	0.602	0.02087
12.9	0.602	0.02079
12.95	0.602	0.02072
13	0.602	0.02064
13.05	0.602	0.02056
13.1	0.602	0.02048
13.15	0.602	0.0204
13.2	0.602	0.02033
13.25	0.602	0.02025
13.3	0.602	0.02017
13.35	0.602	0.02009
13.4	0.602	0.02001
13.45	0.602	0.01993
13.5	0.602	0.01985
13.55	0.602	0.01978
13.6	0.602	0.0197
13.65	0.602	0.01962
13.7	0.602	0.01954
13.75	0.602	0.01946
13.8	0.602	0.01938
13.85	0.602	0.0193
13.9	0.602	0.01922
13.95	0.602	0.01914
14	0.602	0.01906
14.05	0.602	0.01898
14.1	0.602	0.0189
14.15	0.602	0.01882
14.2	0.602	0.01874
14.25	0.602	0.01866
14.3	0.602	0.01858
14.35	0.602	0.0185
14.4	0.602	0.01842
14.45	0.602	0.01834
14.5	0.602	0.01826
14.55	0.602	0.01818
14.6	0.602	0.0181
14.65	0.602	0.01802
14.7	0.602	0.01794
14.75	0.602	0.01786
14.8	0.602	0.01778
14.85	0.602	0.0177
14.9	0.602	0.01762
14.95	0.602	0.01754
15	0.602	0.01746
15.05	0.602	0.01738
15.1	0.602	0.0173
15.15	0.602	0.01722
15.2	0.602	0.01714
15.25	0.602	0.01706
15.3	0.602	0.01698
15.35	0.602	0.01689
15.4	0.602	0.01681
15.45	0.602	0.01673
15.5	0.602	0.01665
15.55	0.602	0.01657
15.6	0.602	0.01649
15.65	0.602	0.01641
15.7	0.602	0.01633
15.75	0.602	0.01625
15.8	0.602	0.01617
15.85	0.602	0.01609
15.9	0.602	0.01601
15.95	0.602	0.01593
16	0.602	0.01585
16.05	0.602	0.01577
16.1	0.602	0.01569
16.15	0.602	0.01561
16.2	0.602	0.01553
16.25	0.602	0.01545
16.3	0.602	0.01537
16.35	0.602	0.01529
16.4	0.602	0.01522
16.45	0.602	0.01514
16.5	0.602	0.01506
16.55	0.602	0.01498
16.6	0.602	0.0149
16.65	0.602	0.01482
16.7	0.602	0.01474
16.75	0.602	0.01466
16.8	0.602	0.01458
16.85	0.602	0.0145
16.9	0.602	0.01443
16.95	0.602	0.01435
17	0.602	0.01427
17.05	0.602	0.01419
17.1	0.602	0.01411
17.15	0.602	0.01403
17.2	0.602	0.01396
17.25	0.602	0.01388
17.3	0.602	0.0138
17.35	0.602	0.01373
17.4	0.602	0.01366
17.45	0.602	0.01361
17.5	0.602	0.01357
17.55	0.602	0.01356
17.6	0.602	0.01359
17.65	0.602	0.01367
17.7	0.602	0.0138
17.75	0.602	0.01398
17.8	0.602	0.01421
17.85	0.602	0.01451
17.9	0.602	0.01489
17.95	0.602	0.01532
18	0.602	0.01579
18.05	0.602	0.01631
18.1	0.602	0.01674
18.15	0.602	0.01709
18.2	0.602	0.0173
18.25	0.602	0.01731
18.3	0.602	0.01716
18.35	0.602	0.01684
18.4	0.602	0.01635
18.45	0.602	0.01569
18.5	0.602	0.01488
18.55	0.602	0.01394
18.6	0.602	0.01289
18.65	0.602	0.01178
18.7	0.602	0.01068
18.75	0.602	0.00963
18.8	0.602	0.00872
18.85	0.602	0.00802
18.9	0.602	0.0076
18.95	0.602	0.00748
19	0.602	0.00761
19.05	0.602	0.00787
19.1	0.602	0.00817
19.15	0.602	0.00841
19.2	0.602	0.00852
19.25	0.602	0.00841
19.3	0.602	0.00807
19.35	0.602	0.00761
19.4	0.602	0.00698
19.45	0.602	0.0063
19.5	0.602	0.00554
19.55	0.602	0.00489
19.6	0.602	0.00436
19.65	0.602	0.00395
19.7	0.602	0.00371
19.75	0.602	0.00366
19.8	0.602	0.00381
19.85	0.602	0.00408
19.9	0.602	0.00438
19.95	0.602	0.00473
20	0.602	0.00505
20.05	0.602	0.00538
20.1	0.602	0.00564
20.15	0.602	0.00587
20.2	0.602	0.00602
20.25	0.602	0.0062
20.3	0.602	0.00627
20.35	0.602	0.00631
20.4	0.602	0.00629
20.45	0.602	0.00623
20.5	0.602	0.00612
20.55	0.602	0.00599
20.6	0.602	0.0059
20.65	0.602	0.00586
20.7	0.602	0.00588
20.75	0.602	0.00597
20.8	0.602	0.00617
20.85	0.602	0.00643
20.9	0.602	0.00677
20.95	0.602	0.00718
21	0.602	0.00771
21.05	0.602	0.00832
21.1	0.602	0.00889
21.15	0.602	0.00971
21.2	0.602	0.01054
21.25	0.602	0.01132
21.3	0.602	0.01211
21.35	0.602	0.0128
21.4	0.602	0.0133
21.45	0.602	0.0136
21.5	0.602	0.01371
21.55	0.602	0.01372
21.6	0.602	0.01341
21.65	0.602	0.01292
21.7	0.602	0.01228
21.75	0.602	0.01148
21.8	0.602	0.01071
21.85	0.602	0.00992
21.9	0.602	0.00917
21.95	0.602	0.00858
22	0.602	0.00818
22.05	0.602	0.00791
22.1	0.602	0.0078
22.15	0.602	0.00781
22.2	0.602	0.00786
22.25	0.602	0.00789
22.3	0.602	0.00786
22.35	0.602	0.00786
22.4	0.602	0.00777
22.45	0.602	0.00769
22.5	0.602	0.00754
22.55	0.602	0.00733
22.6	0.602	0.00708
22.65	0.602	0.00674
22.7	0.602	0.00646
22.75	0.602	0.00608
22.8	0.602	0.00574
22.85	0.602	0.00551
22.9	0.602	0.00528
22.95	0.602	0.00511
23	0.602	0.00501
23.05	0.602	0.00481
23.1	0.602	0.00461
23.15	0.602	0.00448
23.2	0.602	0.00438
23.25	0.602	0.00419
23.3	0.602	0.00384
-8	0.653	0.01264
-7.95	0.653	0.01292
-7.9	0.653	0.01318
-7.85	0.653	0.01351
-7.8	0.653	0.01365
-7.75	0.653	0.01388
-7.7	0.653	0.01404
-7.65	0.653	0.01415
-7.6	0.653	0.01414
-7.55	0.653	0.01426
-7.5	0.653	0.01426
-7.45	0.653	0.01437
-7.4	0.653	0.01432
-7.35	0.653	0.01414
-7.3	0.653	0.01399
-7.25	0.653	0.01372
-7.2	0.653	0.01366
-7.15	0.653	0.01356
-7.1	0.653	0.01355
-7.05	0.653	0.01351
-7	0.653	0.01353
-6.95	0.653	0.01359
-6.9	0.653	0.01371
-6.85	0.653	0.01382
-6.8	0.653	0.01392
-6.75	0.653	0.01404
-6.7	0.653	0.01415
-6.65	0.653	0.01424
-6.6	0.653	0.01435
-6.55	0.653	0.01443
-6.5	0.653	0.01454
-6.45	0.653	0.01457
-6.4	0.653	0.01458
-6.35	0.653	0.01457
-6.3	0.653	0.01465
-6.25	0.653	0.01457
-6.2	0.653	0.01454
-6.15	0.653	0.01461
-6.1	0.653	0.01475
-6.05	0.653	0.01468
-6	0.653	0.01477
-5.95	0.653	0.01499
-5.9	0.653	0.01489
-5.85	0.653	0.01486
-5.8	0.653	0.01515
-5.75	0.653	0.01539
-5.7	0.653	0.01563
-5.65	0.653	0.0157
-5.6	0.653	0.016
-5.55	0.653	0.01622
-5.5	0.653	0.0163
-5.45	0.653	0.01666
-5.4	0.653	0.0167
-5.35	0.653	0.01677
-5.3	0.653	0.01694
-5.25	0.653	0.01693
-5.2	0.653	0.01711
-5.15	0.653	0.01748
-5.1	0.653	0.01754
-5.05	0.653	0.01749
-5	0.653	0.01772
-4.95	0.653	0.01808
-4.9	0.653	0.01835
-4.85	0.653	0.01834
-4.8	0.653	0.01861
-4.75	0.653	0.01856
-4.7	0.653	0.01855
-4.65	0.653	0.01851
-4.6	0.653	0.01863
-4.55	0.653	0.0187
-4.5	0.653	0.01872
-4.45	0.653	0.01886
-4.4	0.653	0.01896
-4.35	0.653	0.01908
-4.3	0.653	0.01921
-4.25	0.653	0.01931
-4.2	0.653	0.0194
-4.15	0.653	0.01948
-4.1	0.653	0.01962
-4.05	0.653	0.01974
-4	0.653	0.0199
-3.95	0.653	0.02004
-3.9	0.653	0.02006
-3.85	0.653	0.02016
-3.8	0.653	0.02029
-3.75	0.653	0.02017
-3.7	0.653	0.02024
-3.65	0.653	0.02019
-3.6	0.653	0.02029
-3.55	0.653	0.02049
-3.5	0.653	0.02084
-3.45	0.653	0.021
-3.4	0.653	0.02105
-3.35	0.653	0.0213
-3.3	0.653	0.02129
-3.25	0.653	0.02151
-3.2	0.653	0.0217
-3.15	0.653	0.0217
-3.1	0.653	0.022
-3.05	0.653	0.02224
-3	0.653	0.02229
-2.95	0.653	0.02259
-2.9	0.653	0.02248
-2.85	0.653	0.02247
-2.8	0.653	0.02264
-2.75	0.653	0.02265
-2.7	0.653	0.02278
-2.65	0.653	0.02268
-2.6	0.653	0.02306
-2.55	0.653	0.02329
-2.5	0.653	0.02363
-2.45	0.653	0.02389
-2.4	0.653	0.02401
-2.35	0.653	0.02422
-2.3	0.653	0.02431
-2.25	0.653	0.02428
-2.2	0.653	0.02442
-2.15	0.653	0.0245
[truncated: 41,891 more rows]

[truncated: 12 more sheets: Fig. 3d, Fig. 4a, Fig. 4b, Fig. 4c, Fig. 4d, Fig. 5a, Fig. 5b, Fig. 5c, Fig. 5d, Fig. 6a, Fig. 6b, Fig. 6c]
